# Supplementary material for: Genome-Wide Association Study in Pseudo-F2 Populations of Switchgrass Identifies Genetic Loci Affecting Heading and Anthesis Dates
Source: Front Plant Sci. 2018 Sep 13;9:1250. doi: 10.3389/fpls.2018.01250 (PMC6146286; doi:10.3389/fpls.2018.01250)
Supplement: Supplementary file 1 [file Data_Sheet_1.fasta]

###################################################
# Formatting and processing of SNP data
###################################################
#--------------------
# Script parameters
#--------------------
# PMV threshold
pmv_threshold <- 0.2

# Sequencing depth threshold
seqD_threshold <- -log(0.2)

# MAF threshold
# If NULL, 1/2N
maf_threshold <- 0.05

# Starting value of error rate estimate
er <- 0.01

# Maximum number of iterations in EM
n_iter <- 100

# Convergence threshold on error rate estimate in EM
conv_threshold <- 1e-7

# QC based on duplicates ?
QC_duplicates <- FALSE
threshold_on_discrepancy <- 0.1

# Number of cores (parallelization of EM algorithm)
n_cores <- 4

#--------------------
# Working directory
#--------------------
setwd("~/ELLSU/")

input_dir <- "Input"
pop_names <- c("34", "43", "17", "71")

#--------------------
# Libraries
#--------------------
library(snow)
library(abind)

#--------------------
# Functions
#--------------------
# Returns "naive" calls of dosage; i.e. the number of non-reference alleles by site
getDosage <- function(mat, alleles) {
  
  n <- nrow(mat)
  p <- ncol(mat)
  
  if (ncol(alleles) != 2 | nrow(alleles) != p) stop("'alleles' must be a matrix of dimension ncol('mat') x 2")
  
  out <- sapply(1:p, function(j) {
    
    X_j <- mat[,j]
    
    a1 <- numeric( n )
    a1[grep(alleles[j,1], X_j)] <- 1
    
    a2 <- numeric( n )
    a2[grep(alleles[j,2], X_j)] <- 1
    
    counts <- a2 - a1 + 1
    counts[X_j == "."] <- NA
    
    return( counts )
    
  })
  
  rownames(out) <- rownames(mat)
  colnames(out) <- colnames(mat)
  
  return( out )
  
}

# Returns an array of matrices of (1) reference allele counts and (2) non-reference allele counts
getCount <- function(mat, alleles) {
  
  n <- nrow(mat)
  p <- ncol(mat)
  
  if (ncol(alleles) != 2 | nrow(alleles) != p) stop("'alleles' must be a matrix of dimension ncol('mat') x 2")
  
  c1 <- sapply(1:p, function(j) {
    
    X_j <- mat[,j]
    
    c <- as.numeric(gsub( "[[:alpha:]()/]", "", gsub(paste(alleles[j,2],"[(][0-9]*[)]", sep=""), "", X_j)))
    
    c[is.na(c)] <- 0
    
    return(c)
    
  })
  
  c2 <- sapply(1:p, function(j) {

    X_j <- mat[,j]
    
    c <- as.numeric(gsub( "[[:alpha:]()/]", "", gsub(paste(alleles[j,1],"[(][0-9]*[)]", sep=""), "", X_j)))
    
    c[is.na(c)] <- 0
    
    return(c)
    
  })
  
  out <- array(c(c1, c2), dim = c(n, p, 2), dimnames = list(rownames(mat), colnames(mat), NULL))
  
  return( out )
  
}

# EM algorithm for parameter estimation
EME <- function(X, N, pop, alpha_init, q_init, maxIter, tol){
  
  # Initialization
  pop <- factor(pop)
  
  alpha <- alpha_init
  q <- q_init
  
  # Iteration
  for ( k in 1:maxIter ){
    
    X_vv <- 0
    N_vv <- 0
    
    X_rr <- 0
    N_rr <- 0
    
    ## Posterior probabilities for each genotype
    for ( j in 1:nlevels(pop) ) {
      
      S_j <- sum( pop == levels(pop)[j] )
      
      X_j <- X[pop == levels(pop)[j]]
      N_j <- N[pop == levels(pop)[j]]
      
      P_j <- sapply(1:S_j, function(i) {
        
        p_vv <- (1 - alpha )^X_j[i] * alpha^(N_j[i]-X_j[i]) * q[j]^2
        p_rv <- (0.5)^N_j[i] * 2*q[j]*(1-q[j])
        p_rr <- alpha^X_j[i] * (1 - alpha )^(N_j[i]-X_j[i]) * (1-q[j])^2
        
        p_total <- p_vv + p_rv + p_rr
        
        return( c(p_vv, p_rv, p_rr)/p_total )
        
      }
      )
      
      ## E-step
      X_vv <- X_vv + sum( X_j * P_j[1,] )
      N_vv <- N_vv + sum( N_j * P_j[1,] )
      
      
      X_rr <- X_rr + sum( X_j * P_j[3,] )
      N_rr <- N_rr + sum( N_j * P_j[3,] )
      
      S_j_vv <- sum( P_j[1,] )
      S_j_rv <- sum( P_j[2,] )
      
      ## M-step on q
      q[j] <- (2*S_j_vv + S_j_rv)/(2*S_j)
      
    }
    
    ## M-step on alpha
    alpha_old <- alpha
    alpha <- ( N_vv - X_vv + X_rr )/(N_vv + N_rr)
    
    # Termination ?
    if ( abs(alpha_old - alpha) <= tol ) break
    
  }
  
  return( list(alpha=alpha, q=q, n_iter=k) )
  
}

# Bayesian genotype calling
BC <- function(X, N, pop, alpha, q) {
  
  pop <- factor(pop)
  
  out <- rep(NA, length(X))
  
  for ( j in 1:nlevels(pop) ) {
    
    S_j <- sum( pop == levels(pop)[j] )
    
    X_j <- X[pop == levels(pop)[j]]
    N_j <- N[pop == levels(pop)[j]]
    
    out[pop == levels(pop)[j]][which(N_j > 0)] <- sapply(which(N_j > 0), function(i) {
      
      p_vv <- (1 - alpha )^X_j[i] * alpha^(N_j[i]-X_j[i]) * q[j]^2
      p_rv <- (0.5)^N_j[i] * 2*q[j]*(1-q[j])
      p_rr <- alpha^X_j[i] * (1 - alpha )^(N_j[i]-X_j[i]) * (1-q[j])^2
      
      p_total <- p_vv + p_rv + p_rr
      
      return( (2*p_vv + p_rv)/p_total )
      
    }
    )
    
  }
  
  return(out)
  
}

#--------------------
# Importation
#--------------------
# Sample information
SI <- do.call(rbind,
              lapply(pop_names, function(pop_name) {
                tmp <- as.character(read.table(paste(input_dir, paste("ellsu_", pop_name, ".txt", sep=""), sep="/"), nrows=1, stringsAsFactors = FALSE))
                return( data.frame(pop=pop_name, genotype=tmp[5:length(tmp)]) )
              })
)


# SNP information
raw <- read.table(paste(input_dir, paste("ellsu_", pop_names[1], ".txt", sep=""), sep="/"), header=TRUE, check.names = FALSE, stringsAsFactors = FALSE)
GM <- raw[, 1:4]
GM$SNP <- paste("rs", rownames(raw), sep="")

rm(raw)

# Non-formatted SNP data matrix
geno_nf <- do.call(
  rbind,
  lapply(pop_names,
         function(pop_name) {
           
           raw <- read.table(paste(input_dir, paste("ellsu_", pop_name, ".txt", sep=""), sep="/"), header=TRUE, check.names = FALSE, stringsAsFactors = FALSE)
           
           out <- t(raw[, 5:length(raw)])
           
           colnames(out) <- paste("rs", rownames(raw), sep="")
           
           return(out)
           
         })
)

# Alleles by SNP
alleles <- GM[,c(3,4)]

# Naive SNP calls
geno_naive <- getDosage(mat = geno_nf, alleles = alleles)

# Count data
geno_count <- getCount(mat = geno_nf, alleles = alleles)

###############################################################################################
# Quality control based on naive calls and read count data
###############################################################################################
# Filtering criteria
## PMV
pmv <- sapply(pop_names, function(pop_name) {
  apply(geno_naive[SI$pop == pop_name,], 2, function(x) mean(is.na(x)))
})

## Sequencing depth
seqD <- sapply(pop_names, function(pop_name) {
  apply(apply(geno_count[SI$pop == pop_name,,], c(1,2), sum), 2, mean)
})

## MAF
maf <- sapply(pop_names, function(pop_name) {
  apply(geno_naive[SI$pop == pop_name,], 2, function(x) {
    af <- mean(x, na.rm=TRUE)/2
    return(min(af, 1-af))
    })
})

# Filtering markers
## High enough call rate
OK_pmv <- apply(pmv, 1, function(x) sum(x > pmv_threshold) == 0)
## High enough sequencing depth
OK_seqD <- apply(seqD, 1, function(x) sum(x < seqD_threshold) == 0)
## Polymorphism
if (is.null(maf_threshold)) {
  OK_maf <- apply(sapply(pop_names, function(pop_name) maf[,pop_name] > 1/(2*sum(SI$pop == pop_name))), 1, any)
} else {
  OK_maf <- apply(maf, 1, function(x) any(x > maf_threshold))
}

OK <- OK_pmv & OK_seqD & OK_maf

geno_naive <- geno_naive[, OK]
geno_count <- geno_count[, OK,]

#--------------------
# Exporting data
#--------------------
saveRDS(GM, "Output/GM.rds")
saveRDS(geno_naive, "Output/geno_naive.rds")
saveRDS(geno_count, "Output/geno_count.rds")

###############################################################################################
#--------------------
# EM estimation of error rate (alpha) and population-wise frequency of non-reference allele (q)
#--------------------
pop <- factor( SI$pop )

## Starting clusters
cl <- makeCluster(rep("localhost", n_cores), type = "SOCK")

## Exporting objects to nodes
clusterExport(cl, list("er", "n_iter", "conv_threshold", "pop", "geno_naive", "geno_count", "EME", "BC"))

#
t0 <- Sys.time()

em_est <- parSapply(cl, 1:ncol(geno_naive), function(j) {
  
  em <- EME(X = geno_count[,j,2],
            N = geno_count[,j,1] + geno_count[,j,2],
            pop = pop,
            alpha_init = er,
            q_init = tapply(geno_naive[,j], pop, function(x) mean(x, na.rm=TRUE)/2),
            maxIter = n_iter,
            tol = conv_threshold
  )
  
  return( unlist(em) )
  
}
)

t1 <- Sys.time()

print( t1-t0 )

#--------------------
# Genotype calling, based on EM estimates of error rate and population-wise frequencies of non-reference allele
#--------------------
## Exporting objects to nodes
clusterExport(cl, list("em_est"))

#
geno <- parSapply(cl, 1:ncol(geno_naive), function(j) {
  
  BC(X = geno_count[,j,2],
     N = geno_count[,j,1] + geno_count[,j,2],
     pop = pop,
     alpha = em_est["alpha",j],
     q = em_est[!(rownames(em_est) %in% c("alpha", "n_iter")), j]
     )

}
)

rownames(geno) <- rownames(geno_naive)
colnames(geno) <- colnames(geno_naive)

## Stopping clusters
stopCluster(cl)

###############################################################################################
# Quality control based on expected allelic dosages
###############################################################################################
# Filtering criteria
## MAF
maf <- sapply(pop_names, function(pop_name) {
  apply(geno[SI$pop == pop_name,], 2, function(x) {
    af <- mean(x, na.rm=TRUE)/2
    return(min(af, 1-af))
  })
})

# Filtering markers
## Polymorphism
if (is.null(maf_threshold)) {
  OK_maf <- apply(sapply(pop_names, function(pop_name) maf[,pop_name] > 1/(2*sum(SI$pop == pop_name))), 1, any)
} else {
  OK_maf <- apply(maf, 1, function(x) any(x > maf_threshold))
}

OK <- OK_maf

geno <- geno[, OK]

#--------------------
# Exporting formatted and processed genotype data
#--------------------
# csv
write.table(geno, "Output/geno.csv", sep=",")

# rds
saveRDS(geno, "Output/geno.rds")
