# Supplementary material for: Genome-Wide Association Study in Pseudo-F2 Populations of Switchgrass Identifies Genetic Loci Affecting Heading and Anthesis Dates
Source: Front Plant Sci. 2018 Sep 13;9:1250. doi: 10.3389/fpls.2018.01250 (PMC6146286; doi:10.3389/fpls.2018.01250)
Supplement: Supplementary file 5 [file Table_1.xlsx]

## Sheet: Sheet1
Supplementary Table S1. Sample name of the four genotyped pseudo-F2 switchgrass populations
Sample Name	Sample Title	Sample ID	Grandmother	Grandfather	Mother	Father	Population	ellsu_17_(376)	ellsu_71_(118)	ellsu_34_(134)	ellsu_43_(77)	Biosample
1001	Sample: 1001, Grandmother: B9-001, Grandfather: S-041, Mother: BxS #1, Father: BxS #7, Population: ellsu_17, Exome capture sequencing of seedling leaf tissue	1001	B9-001	S-041	BxS #1	BxS #7	ellsu_17	1				SAMN08938412
1002	Sample: 1002, Grandmother: B9-001, Grandfather: S-041, Mother: BxS #1, Father: BxS #7, Population: ellsu_17, Exome capture sequencing of seedling leaf tissue	1002	B9-001	S-041	BxS #1	BxS #7	ellsu_17	1				SAMN08938413
1003	Sample: 1003, Grandmother: B9-001, Grandfather: S-041, Mother: BxS #1, Father: BxS #7, Population: ellsu_17, Exome capture sequencing of seedling leaf tissue	1003	B9-001	S-041	BxS #1	BxS #7	ellsu_17	1				SAMN08938414
1004	Sample: 1004, Grandmother: B9-001, Grandfather: S-041, Mother: BxS #1, Father: BxS #7, Population: ellsu_17, Exome capture sequencing of seedling leaf tissue	1004	B9-001	S-041	BxS #1	BxS #7	ellsu_17	1				SAMN08938415
1005	Sample: 1005, Grandmother: B9-001, Grandfather: S-041, Mother: BxS #1, Father: BxS #7, Population: ellsu_17, Exome capture sequencing of seedling leaf tissue	1005	B9-001	S-041	BxS #1	BxS #7	ellsu_17	1				SAMN08938416
1006	Sample: 1006, Grandmother: B9-001, Grandfather: S-041, Mother: BxS #1, Father: BxS #7, Population: ellsu_17, Exome capture sequencing of seedling leaf tissue	1006	B9-001	S-041	BxS #1	BxS #7	ellsu_17	1				SAMN08938417
1007	Sample: 1007, Grandmother: B9-001, Grandfather: S-041, Mother: BxS #1, Father: BxS #7, Population: ellsu_17, Exome capture sequencing of seedling leaf tissue	1007	B9-001	S-041	BxS #1	BxS #7	ellsu_17	1				SAMN08938418
1008	Sample: 1008, Grandmother: B9-001, Grandfather: S-041, Mother: BxS #1, Father: BxS #7, Population: ellsu_17, Exome capture sequencing of seedling leaf tissue	1008	B9-001	S-041	BxS #1	BxS #7	ellsu_17	1				SAMN08938419
1009	Sample: 1009, Grandmother: B9-001, Grandfather: S-041, Mother: BxS #1, Father: BxS #7, Population: ellsu_17, Exome capture sequencing of seedling leaf tissue	1009	B9-001	S-041	BxS #1	BxS #7	ellsu_17	1				SAMN08938420
1010	Sample: 1010, Grandmother: B9-001, Grandfather: S-041, Mother: BxS #1, Father: BxS #7, Population: ellsu_17, Exome capture sequencing of seedling leaf tissue	1010	B9-001	S-041	BxS #1	BxS #7	ellsu_17	1				SAMN08938421
1011	Sample: 1011, Grandmother: B9-001, Grandfather: S-041, Mother: BxS #1, Father: BxS #7, Population: ellsu_17, Exome capture sequencing of seedling leaf tissue	1011	B9-001	S-041	BxS #1	BxS #7	ellsu_17	1				SAMN08938422
1012	Sample: 1012, Grandmother: B9-001, Grandfather: S-041, Mother: BxS #1, Father: BxS #7, Population: ellsu_17, Exome capture sequencing of seedling leaf tissue	1012	B9-001	S-041	BxS #1	BxS #7	ellsu_17	1				SAMN08938423
1013	Sample: 1013, Grandmother: B9-001, Grandfather: S-041, Mother: BxS #1, Father: BxS #7, Population: ellsu_17, Exome capture sequencing of seedling leaf tissue	1013	B9-001	S-041	BxS #1	BxS #7	ellsu_17	1				SAMN08938424
1014	Sample: 1014, Grandmother: B9-001, Grandfather: S-041, Mother: BxS #1, Father: BxS #7, Population: ellsu_17, Exome capture sequencing of seedling leaf tissue	1014	B9-001	S-041	BxS #1	BxS #7	ellsu_17	1				SAMN08938425
1015	Sample: 1015, Grandmother: B9-001, Grandfather: S-041, Mother: BxS #1, Father: BxS #7, Population: ellsu_17, Exome capture sequencing of seedling leaf tissue	1015	B9-001	S-041	BxS #1	BxS #7	ellsu_17	1				SAMN08938426
1018	Sample: 1018, Grandmother: B9-001, Grandfather: S-041, Mother: BxS #1, Father: BxS #7, Population: ellsu_17, Exome capture sequencing of seedling leaf tissue	1018	B9-001	S-041	BxS #1	BxS #7	ellsu_17	1				SAMN08938427
1019	Sample: 1019, Grandmother: B9-001, Grandfather: S-041, Mother: BxS #1, Father: BxS #7, Population: ellsu_17, Exome capture sequencing of seedling leaf tissue	1019	B9-001	S-041	BxS #1	BxS #7	ellsu_17	1				SAMN08938428
1020	Sample: 1020, Grandmother: B9-001, Grandfather: S-041, Mother: BxS #1, Father: BxS #7, Population: ellsu_17, Exome capture sequencing of seedling leaf tissue	1020	B9-001	S-041	BxS #1	BxS #7	ellsu_17	1				SAMN08938429
1021	Sample: 1021, Grandmother: B9-001, Grandfather: S-041, Mother: BxS #1, Father: BxS #7, Population: ellsu_17, Exome capture sequencing of seedling leaf tissue	1021	B9-001	S-041	BxS #1	BxS #7	ellsu_17	1				SAMN08938430
1022	Sample: 1022, Grandmother: B9-001, Grandfather: S-041, Mother: BxS #1, Father: BxS #7, Population: ellsu_17, Exome capture sequencing of seedling leaf tissue	1022	B9-001	S-041	BxS #1	BxS #7	ellsu_17	1				SAMN08938431
1023	Sample: 1023, Grandmother: B9-001, Grandfather: S-041, Mother: BxS #1, Father: BxS #7, Population: ellsu_17, Exome capture sequencing of seedling leaf tissue	1023	B9-001	S-041	BxS #1	BxS #7	ellsu_17	1				SAMN08938432
1024	Sample: 1024, Grandmother: B9-001, Grandfather: S-041, Mother: BxS #1, Father: BxS #7, Population: ellsu_17, Exome capture sequencing of seedling leaf tissue	1024	B9-001	S-041	BxS #1	BxS #7	ellsu_17	1				SAMN08938433
1025	Sample: 1025, Grandmother: B9-001, Grandfather: S-041, Mother: BxS #1, Father: BxS #7, Population: ellsu_17, Exome capture sequencing of seedling leaf tissue	1025	B9-001	S-041	BxS #1	BxS #7	ellsu_17	1				SAMN08938434
1026	Sample: 1026, Grandmother: B9-001, Grandfather: S-041, Mother: BxS #1, Father: BxS #7, Population: ellsu_17, Exome capture sequencing of seedling leaf tissue	1026	B9-001	S-041	BxS #1	BxS #7	ellsu_17	1				SAMN08938435
1027	Sample: 1027, Grandmother: B9-001, Grandfather: S-041, Mother: BxS #1, Father: BxS #7, Population: ellsu_17, Exome capture sequencing of seedling leaf tissue	1027	B9-001	S-041	BxS #1	BxS #7	ellsu_17	1				SAMN08938436
1028	Sample: 1028, Grandmother: B9-001, Grandfather: S-041, Mother: BxS #1, Father: BxS #7, Population: ellsu_17, Exome capture sequencing of seedling leaf tissue	1028	B9-001	S-041	BxS #1	BxS #7	ellsu_17	1				SAMN08938437
1029	Sample: 1029, Grandmother: B9-001, Grandfather: S-041, Mother: BxS #1, Father: BxS #7, Population: ellsu_17, Exome capture sequencing of seedling leaf tissue	1029	B9-001	S-041	BxS #1	BxS #7	ellsu_17	1				SAMN08938438
1030	Sample: 1030, Grandmother: B9-001, Grandfather: S-041, Mother: BxS #1, Father: BxS #7, Population: ellsu_17, Exome capture sequencing of seedling leaf tissue	1030	B9-001	S-041	BxS #1	BxS #7	ellsu_17	1				SAMN08938439
1031	Sample: 1031, Grandmother: B9-001, Grandfather: S-041, Mother: BxS #1, Father: BxS #7, Population: ellsu_17, Exome capture sequencing of seedling leaf tissue	1031	B9-001	S-041	BxS #1	BxS #7	ellsu_17	1				SAMN08938440
1032	Sample: 1032, Grandmother: B9-001, Grandfather: S-041, Mother: BxS #1, Father: BxS #7, Population: ellsu_17, Exome capture sequencing of seedling leaf tissue	1032	B9-001	S-041	BxS #1	BxS #7	ellsu_17	1				SAMN08938441
1033	Sample: 1033, Grandmother: B9-001, Grandfather: S-041, Mother: BxS #1, Father: BxS #7, Population: ellsu_17, Exome capture sequencing of seedling leaf tissue	1033	B9-001	S-041	BxS #1	BxS #7	ellsu_17	1				SAMN08938442
1034	Sample: 1034, Grandmother: B9-001, Grandfather: S-041, Mother: BxS #1, Father: BxS #7, Population: ellsu_17, Exome capture sequencing of seedling leaf tissue	1034	B9-001	S-041	BxS #1	BxS #7	ellsu_17	1				SAMN08938443
1035	Sample: 1035, Grandmother: B9-001, Grandfather: S-041, Mother: BxS #1, Father: BxS #7, Population: ellsu_17, Exome capture sequencing of seedling leaf tissue	1035	B9-001	S-041	BxS #1	BxS #7	ellsu_17	1				SAMN08938444
1036	Sample: 1036, Grandmother: B9-001, Grandfather: S-041, Mother: BxS #1, Father: BxS #7, Population: ellsu_17, Exome capture sequencing of seedling leaf tissue	1036	B9-001	S-041	BxS #1	BxS #7	ellsu_17	1				SAMN08938445
1037	Sample: 1037, Grandmother: B9-001, Grandfather: S-041, Mother: BxS #1, Father: BxS #7, Population: ellsu_17, Exome capture sequencing of seedling leaf tissue	1037	B9-001	S-041	BxS #1	BxS #7	ellsu_17	1				SAMN08938446
1038	Sample: 1038, Grandmother: B9-001, Grandfather: S-041, Mother: BxS #1, Father: BxS #7, Population: ellsu_17, Exome capture sequencing of seedling leaf tissue	1038	B9-001	S-041	BxS #1	BxS #7	ellsu_17	1				SAMN08938447
1039	Sample: 1039, Grandmother: B9-001, Grandfather: S-041, Mother: BxS #1, Father: BxS #7, Population: ellsu_17, Exome capture sequencing of seedling leaf tissue	1039	B9-001	S-041	BxS #1	BxS #7	ellsu_17	1				SAMN08938448
1041	Sample: 1041, Grandmother: B9-001, Grandfather: S-041, Mother: BxS #1, Father: BxS #7, Population: ellsu_17, Exome capture sequencing of seedling leaf tissue	1041	B9-001	S-041	BxS #1	BxS #7	ellsu_17	1				SAMN08938449
1042	Sample: 1042, Grandmother: B9-001, Grandfather: S-041, Mother: BxS #1, Father: BxS #7, Population: ellsu_17, Exome capture sequencing of seedling leaf tissue	1042	B9-001	S-041	BxS #1	BxS #7	ellsu_17	1				SAMN08938450
1043	Sample: 1043, Grandmother: B9-001, Grandfather: S-041, Mother: BxS #1, Father: BxS #7, Population: ellsu_17, Exome capture sequencing of seedling leaf tissue	1043	B9-001	S-041	BxS #1	BxS #7	ellsu_17	1				SAMN08938451
1044	Sample: 1044, Grandmother: B9-001, Grandfather: S-041, Mother: BxS #1, Father: BxS #7, Population: ellsu_17, Exome capture sequencing of seedling leaf tissue	1044	B9-001	S-041	BxS #1	BxS #7	ellsu_17	1				SAMN08938452
1045	Sample: 1045, Grandmother: B9-001, Grandfather: S-041, Mother: BxS #1, Father: BxS #7, Population: ellsu_17, Exome capture sequencing of seedling leaf tissue	1045	B9-001	S-041	BxS #1	BxS #7	ellsu_17	1				SAMN08938453
1046	Sample: 1046, Grandmother: B9-001, Grandfather: S-041, Mother: BxS #1, Father: BxS #7, Population: ellsu_17, Exome capture sequencing of seedling leaf tissue	1046	B9-001	S-041	BxS #1	BxS #7	ellsu_17	1				SAMN08938454
1047	Sample: 1047, Grandmother: B9-001, Grandfather: S-041, Mother: BxS #1, Father: BxS #7, Population: ellsu_17, Exome capture sequencing of seedling leaf tissue	1047	B9-001	S-041	BxS #1	BxS #7	ellsu_17	1				SAMN08938455
1048	Sample: 1048, Grandmother: B9-001, Grandfather: S-041, Mother: BxS #1, Father: BxS #7, Population: ellsu_17, Exome capture sequencing of seedling leaf tissue	1048	B9-001	S-041	BxS #1	BxS #7	ellsu_17	1				SAMN08938456
1049	Sample: 1049, Grandmother: B9-001, Grandfather: S-041, Mother: BxS #1, Father: BxS #7, Population: ellsu_17, Exome capture sequencing of seedling leaf tissue	1049	B9-001	S-041	BxS #1	BxS #7	ellsu_17	1				SAMN08938457
1051	Sample: 1051, Grandmother: B9-001, Grandfather: S-041, Mother: BxS #1, Father: BxS #7, Population: ellsu_17, Exome capture sequencing of seedling leaf tissue	1051	B9-001	S-041	BxS #1	BxS #7	ellsu_17	1				SAMN08938458
1052	Sample: 1052, Grandmother: B9-001, Grandfather: S-041, Mother: BxS #1, Father: BxS #7, Population: ellsu_17, Exome capture sequencing of seedling leaf tissue	1052	B9-001	S-041	BxS #1	BxS #7	ellsu_17	1				SAMN08938459
1053	Sample: 1053, Grandmother: B9-001, Grandfather: S-041, Mother: BxS #1, Father: BxS #7, Population: ellsu_17, Exome capture sequencing of seedling leaf tissue	1053	B9-001	S-041	BxS #1	BxS #7	ellsu_17	1				SAMN08938460
1054	Sample: 1054, Grandmother: B9-001, Grandfather: S-041, Mother: BxS #1, Father: BxS #7, Population: ellsu_17, Exome capture sequencing of seedling leaf tissue	1054	B9-001	S-041	BxS #1	BxS #7	ellsu_17	1				SAMN08938461
1055	Sample: 1055, Grandmother: B9-001, Grandfather: S-041, Mother: BxS #1, Father: BxS #7, Population: ellsu_17, Exome capture sequencing of seedling leaf tissue	1055	B9-001	S-041	BxS #1	BxS #7	ellsu_17	1				SAMN08938462
1056	Sample: 1056, Grandmother: B9-001, Grandfather: S-041, Mother: BxS #1, Father: BxS #7, Population: ellsu_17, Exome capture sequencing of seedling leaf tissue	1056	B9-001	S-041	BxS #1	BxS #7	ellsu_17	1				SAMN08938463
1057	Sample: 1057, Grandmother: B9-001, Grandfather: S-041, Mother: BxS #1, Father: BxS #7, Population: ellsu_17, Exome capture sequencing of seedling leaf tissue	1057	B9-001	S-041	BxS #1	BxS #7	ellsu_17	1				SAMN08938464
1058	Sample: 1058, Grandmother: B9-001, Grandfather: S-041, Mother: BxS #1, Father: BxS #7, Population: ellsu_17, Exome capture sequencing of seedling leaf tissue	1058	B9-001	S-041	BxS #1	BxS #7	ellsu_17	1				SAMN08938465
1059	Sample: 1059, Grandmother: B9-001, Grandfather: S-041, Mother: BxS #1, Father: BxS #7, Population: ellsu_17, Exome capture sequencing of seedling leaf tissue	1059	B9-001	S-041	BxS #1	BxS #7	ellsu_17	1				SAMN08938466
1060	Sample: 1060, Grandmother: B9-001, Grandfather: S-041, Mother: BxS #1, Father: BxS #7, Population: ellsu_17, Exome capture sequencing of seedling leaf tissue	1060	B9-001	S-041	BxS #1	BxS #7	ellsu_17	1				SAMN08938467
1061	Sample: 1061, Grandmother: B9-001, Grandfather: S-041, Mother: BxS #1, Father: BxS #7, Population: ellsu_17, Exome capture sequencing of seedling leaf tissue	1061	B9-001	S-041	BxS #1	BxS #7	ellsu_17	1				SAMN08938468
1062	Sample: 1062, Grandmother: B9-001, Grandfather: S-041, Mother: BxS #1, Father: BxS #7, Population: ellsu_17, Exome capture sequencing of seedling leaf tissue	1062	B9-001	S-041	BxS #1	BxS #7	ellsu_17	1				SAMN08938469
1063	Sample: 1063, Grandmother: B9-001, Grandfather: S-041, Mother: BxS #1, Father: BxS #7, Population: ellsu_17, Exome capture sequencing of seedling leaf tissue	1063	B9-001	S-041	BxS #1	BxS #7	ellsu_17	1				SAMN08938470
1065	Sample: 1065, Grandmother: B9-001, Grandfather: S-041, Mother: BxS #1, Father: BxS #7, Population: ellsu_17, Exome capture sequencing of seedling leaf tissue	1065	B9-001	S-041	BxS #1	BxS #7	ellsu_17	1				SAMN08938471
1067	Sample: 1067, Grandmother: B9-001, Grandfather: S-041, Mother: BxS #1, Father: BxS #7, Population: ellsu_17, Exome capture sequencing of seedling leaf tissue	1067	B9-001	S-041	BxS #1	BxS #7	ellsu_17	1				SAMN08938472
1068	Sample: 1068, Grandmother: B9-001, Grandfather: S-041, Mother: BxS #1, Father: BxS #7, Population: ellsu_17, Exome capture sequencing of seedling leaf tissue	1068	B9-001	S-041	BxS #1	BxS #7	ellsu_17	1				SAMN08938473
1069	Sample: 1069, Grandmother: B9-001, Grandfather: S-041, Mother: BxS #1, Father: BxS #7, Population: ellsu_17, Exome capture sequencing of seedling leaf tissue	1069	B9-001	S-041	BxS #1	BxS #7	ellsu_17	1				SAMN08938474
1070	Sample: 1070, Grandmother: B9-001, Grandfather: S-041, Mother: BxS #1, Father: BxS #7, Population: ellsu_17, Exome capture sequencing of seedling leaf tissue	1070	B9-001	S-041	BxS #1	BxS #7	ellsu_17	1				SAMN08938475
1071	Sample: 1071, Grandmother: B9-001, Grandfather: S-041, Mother: BxS #1, Father: BxS #7, Population: ellsu_17, Exome capture sequencing of seedling leaf tissue	1071	B9-001	S-041	BxS #1	BxS #7	ellsu_17	1				SAMN08938476
1072	Sample: 1072, Grandmother: B9-001, Grandfather: S-041, Mother: BxS #1, Father: BxS #7, Population: ellsu_17, Exome capture sequencing of seedling leaf tissue	1072	B9-001	S-041	BxS #1	BxS #7	ellsu_17	1				SAMN08938477
1073	Sample: 1073, Grandmother: B9-001, Grandfather: S-041, Mother: BxS #1, Father: BxS #7, Population: ellsu_17, Exome capture sequencing of seedling leaf tissue	1073	B9-001	S-041	BxS #1	BxS #7	ellsu_17	1				SAMN08938478
1074	Sample: 1074, Grandmother: B9-001, Grandfather: S-041, Mother: BxS #1, Father: BxS #7, Population: ellsu_17, Exome capture sequencing of seedling leaf tissue	1074	B9-001	S-041	BxS #1	BxS #7	ellsu_17	1				SAMN08938479
1075	Sample: 1075, Grandmother: B9-001, Grandfather: S-041, Mother: BxS #1, Father: BxS #7, Population: ellsu_17, Exome capture sequencing of seedling leaf tissue	1075	B9-001	S-041	BxS #1	BxS #7	ellsu_17	1				SAMN08938480
1076	Sample: 1076, Grandmother: B9-001, Grandfather: S-041, Mother: BxS #1, Father: BxS #7, Population: ellsu_17, Exome capture sequencing of seedling leaf tissue	1076	B9-001	S-041	BxS #1	BxS #7	ellsu_17	1				SAMN08938481
1077	Sample: 1077, Grandmother: B9-001, Grandfather: S-041, Mother: BxS #1, Father: BxS #7, Population: ellsu_17, Exome capture sequencing of seedling leaf tissue	1077	B9-001	S-041	BxS #1	BxS #7	ellsu_17	1				SAMN08938482
1078	Sample: 1078, Grandmother: B9-001, Grandfather: S-041, Mother: BxS #1, Father: BxS #7, Population: ellsu_17, Exome capture sequencing of seedling leaf tissue	1078	B9-001	S-041	BxS #1	BxS #7	ellsu_17	1				SAMN08938483
1079	Sample: 1079, Grandmother: B9-001, Grandfather: S-041, Mother: BxS #1, Father: BxS #7, Population: ellsu_17, Exome capture sequencing of seedling leaf tissue	1079	B9-001	S-041	BxS #1	BxS #7	ellsu_17	1				SAMN08938484
1080	Sample: 1080, Grandmother: B9-001, Grandfather: S-041, Mother: BxS #1, Father: BxS #7, Population: ellsu_17, Exome capture sequencing of seedling leaf tissue	1080	B9-001	S-041	BxS #1	BxS #7	ellsu_17	1				SAMN08938485
1081	Sample: 1081, Grandmother: B9-001, Grandfather: S-041, Mother: BxS #1, Father: BxS #7, Population: ellsu_17, Exome capture sequencing of seedling leaf tissue	1081	B9-001	S-041	BxS #1	BxS #7	ellsu_17	1				SAMN08938486
1082	Sample: 1082, Grandmother: B9-001, Grandfather: S-041, Mother: BxS #1, Father: BxS #7, Population: ellsu_17, Exome capture sequencing of seedling leaf tissue	1082	B9-001	S-041	BxS #1	BxS #7	ellsu_17	1				SAMN08938487
1083	Sample: 1083, Grandmother: B9-001, Grandfather: S-041, Mother: BxS #1, Father: BxS #7, Population: ellsu_17, Exome capture sequencing of seedling leaf tissue	1083	B9-001	S-041	BxS #1	BxS #7	ellsu_17	1				SAMN08938488
1084	Sample: 1084, Grandmother: B9-001, Grandfather: S-041, Mother: BxS #1, Father: BxS #7, Population: ellsu_17, Exome capture sequencing of seedling leaf tissue	1084	B9-001	S-041	BxS #1	BxS #7	ellsu_17	1				SAMN08938489
1085	Sample: 1085, Grandmother: B9-001, Grandfather: S-041, Mother: BxS #1, Father: BxS #7, Population: ellsu_17, Exome capture sequencing of seedling leaf tissue	1085	B9-001	S-041	BxS #1	BxS #7	ellsu_17	1				SAMN08938490
1086	Sample: 1086, Grandmother: B9-001, Grandfather: S-041, Mother: BxS #1, Father: BxS #7, Population: ellsu_17, Exome capture sequencing of seedling leaf tissue	1086	B9-001	S-041	BxS #1	BxS #7	ellsu_17	1				SAMN08938491
1087	Sample: 1087, Grandmother: B9-001, Grandfather: S-041, Mother: BxS #1, Father: BxS #7, Population: ellsu_17, Exome capture sequencing of seedling leaf tissue	1087	B9-001	S-041	BxS #1	BxS #7	ellsu_17	1				SAMN08938492
1088	Sample: 1088, Grandmother: B9-001, Grandfather: S-041, Mother: BxS #1, Father: BxS #7, Population: ellsu_17, Exome capture sequencing of seedling leaf tissue	1088	B9-001	S-041	BxS #1	BxS #7	ellsu_17	1				SAMN08938493
1089	Sample: 1089, Grandmother: B9-001, Grandfather: S-041, Mother: BxS #1, Father: BxS #7, Population: ellsu_17, Exome capture sequencing of seedling leaf tissue	1089	B9-001	S-041	BxS #1	BxS #7	ellsu_17	1				SAMN08938494
1090	Sample: 1090, Grandmother: B9-001, Grandfather: S-041, Mother: BxS #1, Father: BxS #7, Population: ellsu_17, Exome capture sequencing of seedling leaf tissue	1090	B9-001	S-041	BxS #1	BxS #7	ellsu_17	1				SAMN08938495
1091	Sample: 1091, Grandmother: B9-001, Grandfather: S-041, Mother: BxS #1, Father: BxS #7, Population: ellsu_17, Exome capture sequencing of seedling leaf tissue	1091	B9-001	S-041	BxS #1	BxS #7	ellsu_17	1				SAMN08938496
1092	Sample: 1092, Grandmother: B9-001, Grandfather: S-041, Mother: BxS #1, Father: BxS #7, Population: ellsu_17, Exome capture sequencing of seedling leaf tissue	1092	B9-001	S-041	BxS #1	BxS #7	ellsu_17	1				SAMN08938497
1093	Sample: 1093, Grandmother: B9-001, Grandfather: S-041, Mother: BxS #1, Father: BxS #7, Population: ellsu_17, Exome capture sequencing of seedling leaf tissue	1093	B9-001	S-041	BxS #1	BxS #7	ellsu_17	1				SAMN08938498
1094	Sample: 1094, Grandmother: B9-001, Grandfather: S-041, Mother: BxS #1, Father: BxS #7, Population: ellsu_17, Exome capture sequencing of seedling leaf tissue	1094	B9-001	S-041	BxS #1	BxS #7	ellsu_17	1				SAMN08938499
1095	Sample: 1095, Grandmother: B9-001, Grandfather: S-041, Mother: BxS #1, Father: BxS #7, Population: ellsu_17, Exome capture sequencing of seedling leaf tissue	1095	B9-001	S-041	BxS #1	BxS #7	ellsu_17	1				SAMN08938500
1096	Sample: 1096, Grandmother: B9-001, Grandfather: S-041, Mother: BxS #1, Father: BxS #7, Population: ellsu_17, Exome capture sequencing of seedling leaf tissue	1096	B9-001	S-041	BxS #1	BxS #7	ellsu_17	1				SAMN08938501
1097	Sample: 1097, Grandmother: B9-001, Grandfather: S-041, Mother: BxS #1, Father: BxS #7, Population: ellsu_17, Exome capture sequencing of seedling leaf tissue	1097	B9-001	S-041	BxS #1	BxS #7	ellsu_17	1				SAMN08938502
1098	Sample: 1098, Grandmother: B9-001, Grandfather: S-041, Mother: BxS #1, Father: BxS #7, Population: ellsu_17, Exome capture sequencing of seedling leaf tissue	1098	B9-001	S-041	BxS #1	BxS #7	ellsu_17	1				SAMN08938503
1099	Sample: 1099, Grandmother: B9-001, Grandfather: S-041, Mother: BxS #1, Father: BxS #7, Population: ellsu_17, Exome capture sequencing of seedling leaf tissue	1099	B9-001	S-041	BxS #1	BxS #7	ellsu_17	1				SAMN08938504
1100	Sample: 1100, Grandmother: B9-001, Grandfather: S-041, Mother: BxS #1, Father: BxS #7, Population: ellsu_17, Exome capture sequencing of seedling leaf tissue	1100	B9-001	S-041	BxS #1	BxS #7	ellsu_17	1				SAMN08938505
1101	Sample: 1101, Grandmother: B9-001, Grandfather: S-041, Mother: BxS #1, Father: BxS #7, Population: ellsu_17, Exome capture sequencing of seedling leaf tissue	1101	B9-001	S-041	BxS #1	BxS #7	ellsu_17	1				SAMN08938506
1102	Sample: 1102, Grandmother: B9-001, Grandfather: S-041, Mother: BxS #1, Father: BxS #7, Population: ellsu_17, Exome capture sequencing of seedling leaf tissue	1102	B9-001	S-041	BxS #1	BxS #7	ellsu_17	1				SAMN08938507
1103	Sample: 1103, Grandmother: B9-001, Grandfather: S-041, Mother: BxS #1, Father: BxS #7, Population: ellsu_17, Exome capture sequencing of seedling leaf tissue	1103	B9-001	S-041	BxS #1	BxS #7	ellsu_17	1				SAMN08938508
1104	Sample: 1104, Grandmother: B9-001, Grandfather: S-041, Mother: BxS #1, Father: BxS #7, Population: ellsu_17, Exome capture sequencing of seedling leaf tissue	1104	B9-001	S-041	BxS #1	BxS #7	ellsu_17	1				SAMN08938509
1105	Sample: 1105, Grandmother: B9-001, Grandfather: S-041, Mother: BxS #1, Father: BxS #7, Population: ellsu_17, Exome capture sequencing of seedling leaf tissue	1105	B9-001	S-041	BxS #1	BxS #7	ellsu_17	1				SAMN08938510
1106	Sample: 1106, Grandmother: B9-001, Grandfather: S-041, Mother: BxS #1, Father: BxS #7, Population: ellsu_17, Exome capture sequencing of seedling leaf tissue	1106	B9-001	S-041	BxS #1	BxS #7	ellsu_17	1				SAMN08938511
1107	Sample: 1107, Grandmother: B9-001, Grandfather: S-041, Mother: BxS #1, Father: BxS #7, Population: ellsu_17, Exome capture sequencing of seedling leaf tissue	1107	B9-001	S-041	BxS #1	BxS #7	ellsu_17	1				SAMN08938512
1109	Sample: 1109, Grandmother: B9-001, Grandfather: S-041, Mother: BxS #1, Father: BxS #7, Population: ellsu_17, Exome capture sequencing of seedling leaf tissue	1109	B9-001	S-041	BxS #1	BxS #7	ellsu_17	1				SAMN08938513
1110	Sample: 1110, Grandmother: B9-001, Grandfather: S-041, Mother: BxS #1, Father: BxS #7, Population: ellsu_17, Exome capture sequencing of seedling leaf tissue	1110	B9-001	S-041	BxS #1	BxS #7	ellsu_17	1				SAMN08938514
1111	Sample: 1111, Grandmother: B9-001, Grandfather: S-041, Mother: BxS #1, Father: BxS #7, Population: ellsu_17, Exome capture sequencing of seedling leaf tissue	1111	B9-001	S-041	BxS #1	BxS #7	ellsu_17	1				SAMN08938515
1112	Sample: 1112, Grandmother: B9-001, Grandfather: S-041, Mother: BxS #1, Father: BxS #7, Population: ellsu_17, Exome capture sequencing of seedling leaf tissue	1112	B9-001	S-041	BxS #1	BxS #7	ellsu_17	1				SAMN08938516
1113	Sample: 1113, Grandmother: B9-001, Grandfather: S-041, Mother: BxS #1, Father: BxS #7, Population: ellsu_17, Exome capture sequencing of seedling leaf tissue	1113	B9-001	S-041	BxS #1	BxS #7	ellsu_17	1				SAMN08938517
1114	Sample: 1114, Grandmother: B9-001, Grandfather: S-041, Mother: BxS #1, Father: BxS #7, Population: ellsu_17, Exome capture sequencing of seedling leaf tissue	1114	B9-001	S-041	BxS #1	BxS #7	ellsu_17	1				SAMN08938518
1115	Sample: 1115, Grandmother: B9-001, Grandfather: S-041, Mother: BxS #1, Father: BxS #7, Population: ellsu_17, Exome capture sequencing of seedling leaf tissue	1115	B9-001	S-041	BxS #1	BxS #7	ellsu_17	1				SAMN08938519
1116	Sample: 1116, Grandmother: B9-001, Grandfather: S-041, Mother: BxS #1, Father: BxS #7, Population: ellsu_17, Exome capture sequencing of seedling leaf tissue	1116	B9-001	S-041	BxS #1	BxS #7	ellsu_17	1				SAMN08938520
1118	Sample: 1118, Grandmother: B9-001, Grandfather: S-041, Mother: BxS #1, Father: BxS #7, Population: ellsu_17, Exome capture sequencing of seedling leaf tissue	1118	B9-001	S-041	BxS #1	BxS #7	ellsu_17	1				SAMN08938521
1119	Sample: 1119, Grandmother: B9-001, Grandfather: S-041, Mother: BxS #1, Father: BxS #7, Population: ellsu_17, Exome capture sequencing of seedling leaf tissue	1119	B9-001	S-041	BxS #1	BxS #7	ellsu_17	1				SAMN08938522
1120	Sample: 1120, Grandmother: B9-001, Grandfather: S-041, Mother: BxS #1, Father: BxS #7, Population: ellsu_17, Exome capture sequencing of seedling leaf tissue	1120	B9-001	S-041	BxS #1	BxS #7	ellsu_17	1				SAMN08938523
1121	Sample: 1121, Grandmother: B9-001, Grandfather: S-041, Mother: BxS #1, Father: BxS #7, Population: ellsu_17, Exome capture sequencing of seedling leaf tissue	1121	B9-001	S-041	BxS #1	BxS #7	ellsu_17	1				SAMN08938524
1122	Sample: 1122, Grandmother: B9-001, Grandfather: S-041, Mother: BxS #1, Father: BxS #7, Population: ellsu_17, Exome capture sequencing of seedling leaf tissue	1122	B9-001	S-041	BxS #1	BxS #7	ellsu_17	1				SAMN08938525
1123	Sample: 1123, Grandmother: B9-001, Grandfather: S-041, Mother: BxS #1, Father: BxS #7, Population: ellsu_17, Exome capture sequencing of seedling leaf tissue	1123	B9-001	S-041	BxS #1	BxS #7	ellsu_17	1				SAMN08938526
1124	Sample: 1124, Grandmother: B9-001, Grandfather: S-041, Mother: BxS #1, Father: BxS #7, Population: ellsu_17, Exome capture sequencing of seedling leaf tissue	1124	B9-001	S-041	BxS #1	BxS #7	ellsu_17	1				SAMN08938527
1125	Sample: 1125, Grandmother: B9-001, Grandfather: S-041, Mother: BxS #1, Father: BxS #7, Population: ellsu_17, Exome capture sequencing of seedling leaf tissue	1125	B9-001	S-041	BxS #1	BxS #7	ellsu_17	1				SAMN08938528
1126	Sample: 1126, Grandmother: B9-001, Grandfather: S-041, Mother: BxS #1, Father: BxS #7, Population: ellsu_17, Exome capture sequencing of seedling leaf tissue	1126	B9-001	S-041	BxS #1	BxS #7	ellsu_17	1				SAMN08938529
1127	Sample: 1127, Grandmother: B9-001, Grandfather: S-041, Mother: BxS #1, Father: BxS #7, Population: ellsu_17, Exome capture sequencing of seedling leaf tissue	1127	B9-001	S-041	BxS #1	BxS #7	ellsu_17	1				SAMN08938530
1128	Sample: 1128, Grandmother: B9-001, Grandfather: S-041, Mother: BxS #1, Father: BxS #7, Population: ellsu_17, Exome capture sequencing of seedling leaf tissue	1128	B9-001	S-041	BxS #1	BxS #7	ellsu_17	1				SAMN08938531
1129	Sample: 1129, Grandmother: B9-001, Grandfather: S-041, Mother: BxS #1, Father: BxS #7, Population: ellsu_17, Exome capture sequencing of seedling leaf tissue	1129	B9-001	S-041	BxS #1	BxS #7	ellsu_17	1				SAMN08938532
1130	Sample: 1130, Grandmother: B9-001, Grandfather: S-041, Mother: BxS #1, Father: BxS #7, Population: ellsu_17, Exome capture sequencing of seedling leaf tissue	1130	B9-001	S-041	BxS #1	BxS #7	ellsu_17	1				SAMN08938533
1131	Sample: 1131, Grandmother: B9-001, Grandfather: S-041, Mother: BxS #1, Father: BxS #7, Population: ellsu_17, Exome capture sequencing of seedling leaf tissue	1131	B9-001	S-041	BxS #1	BxS #7	ellsu_17	1				SAMN08938534
1132	Sample: 1132, Grandmother: B9-001, Grandfather: S-041, Mother: BxS #1, Father: BxS #7, Population: ellsu_17, Exome capture sequencing of seedling leaf tissue	1132	B9-001	S-041	BxS #1	BxS #7	ellsu_17	1				SAMN08938535
1133	Sample: 1133, Grandmother: B9-001, Grandfather: S-041, Mother: BxS #1, Father: BxS #7, Population: ellsu_17, Exome capture sequencing of seedling leaf tissue	1133	B9-001	S-041	BxS #1	BxS #7	ellsu_17	1				SAMN08938536
1134	Sample: 1134, Grandmother: B9-001, Grandfather: S-041, Mother: BxS #1, Father: BxS #7, Population: ellsu_17, Exome capture sequencing of seedling leaf tissue	1134	B9-001	S-041	BxS #1	BxS #7	ellsu_17	1				SAMN08938537
1135	Sample: 1135, Grandmother: B9-001, Grandfather: S-041, Mother: BxS #1, Father: BxS #7, Population: ellsu_17, Exome capture sequencing of seedling leaf tissue	1135	B9-001	S-041	BxS #1	BxS #7	ellsu_17	1				SAMN08938538
1136	Sample: 1136, Grandmother: B9-001, Grandfather: S-041, Mother: BxS #1, Father: BxS #7, Population: ellsu_17, Exome capture sequencing of seedling leaf tissue	1136	B9-001	S-041	BxS #1	BxS #7	ellsu_17	1				SAMN08938539
1138	Sample: 1138, Grandmother: B9-001, Grandfather: S-041, Mother: BxS #1, Father: BxS #7, Population: ellsu_17, Exome capture sequencing of seedling leaf tissue	1138	B9-001	S-041	BxS #1	BxS #7	ellsu_17	1				SAMN08938540
1139	Sample: 1139, Grandmother: B9-001, Grandfather: S-041, Mother: BxS #1, Father: BxS #7, Population: ellsu_17, Exome capture sequencing of seedling leaf tissue	1139	B9-001	S-041	BxS #1	BxS #7	ellsu_17	1				SAMN08938541
1140	Sample: 1140, Grandmother: B9-001, Grandfather: S-041, Mother: BxS #1, Father: BxS #7, Population: ellsu_17, Exome capture sequencing of seedling leaf tissue	1140	B9-001	S-041	BxS #1	BxS #7	ellsu_17	1				SAMN08938542
1141	Sample: 1141, Grandmother: B9-001, Grandfather: S-041, Mother: BxS #1, Father: BxS #7, Population: ellsu_17, Exome capture sequencing of seedling leaf tissue	1141	B9-001	S-041	BxS #1	BxS #7	ellsu_17	1				SAMN08938543
1142	Sample: 1142, Grandmother: B9-001, Grandfather: S-041, Mother: BxS #1, Father: BxS #7, Population: ellsu_17, Exome capture sequencing of seedling leaf tissue	1142	B9-001	S-041	BxS #1	BxS #7	ellsu_17	1				SAMN08938544
1143	Sample: 1143, Grandmother: B9-001, Grandfather: S-041, Mother: BxS #1, Father: BxS #7, Population: ellsu_17, Exome capture sequencing of seedling leaf tissue	1143	B9-001	S-041	BxS #1	BxS #7	ellsu_17	1				SAMN08938545
1144	Sample: 1144, Grandmother: B9-001, Grandfather: S-041, Mother: BxS #1, Father: BxS #7, Population: ellsu_17, Exome capture sequencing of seedling leaf tissue	1144	B9-001	S-041	BxS #1	BxS #7	ellsu_17	1				SAMN08938546
1145	Sample: 1145, Grandmother: B9-001, Grandfather: S-041, Mother: BxS #1, Father: BxS #7, Population: ellsu_17, Exome capture sequencing of seedling leaf tissue	1145	B9-001	S-041	BxS #1	BxS #7	ellsu_17	1				SAMN08938547
1146	Sample: 1146, Grandmother: B9-001, Grandfather: S-041, Mother: BxS #1, Father: BxS #7, Population: ellsu_17, Exome capture sequencing of seedling leaf tissue	1146	B9-001	S-041	BxS #1	BxS #7	ellsu_17	1				SAMN08938548
1147	Sample: 1147, Grandmother: B9-001, Grandfather: S-041, Mother: BxS #1, Father: BxS #7, Population: ellsu_17, Exome capture sequencing of seedling leaf tissue	1147	B9-001	S-041	BxS #1	BxS #7	ellsu_17	1				SAMN08938549
1148	Sample: 1148, Grandmother: B9-001, Grandfather: S-041, Mother: BxS #1, Father: BxS #7, Population: ellsu_17, Exome capture sequencing of seedling leaf tissue	1148	B9-001	S-041	BxS #1	BxS #7	ellsu_17	1				SAMN08938550
1149	Sample: 1149, Grandmother: B9-001, Grandfather: S-041, Mother: BxS #1, Father: BxS #7, Population: ellsu_17, Exome capture sequencing of seedling leaf tissue	1149	B9-001	S-041	BxS #1	BxS #7	ellsu_17	1				SAMN08938551
1150	Sample: 1150, Grandmother: B9-001, Grandfather: S-041, Mother: BxS #1, Father: BxS #7, Population: ellsu_17, Exome capture sequencing of seedling leaf tissue	1150	B9-001	S-041	BxS #1	BxS #7	ellsu_17	1				SAMN08938552
1151	Sample: 1151, Grandmother: B9-001, Grandfather: S-041, Mother: BxS #1, Father: BxS #7, Population: ellsu_17, Exome capture sequencing of seedling leaf tissue	1151	B9-001	S-041	BxS #1	BxS #7	ellsu_17	1				SAMN08938553
1152	Sample: 1152, Grandmother: B9-001, Grandfather: S-041, Mother: BxS #1, Father: BxS #7, Population: ellsu_17, Exome capture sequencing of seedling leaf tissue	1152	B9-001	S-041	BxS #1	BxS #7	ellsu_17	1				SAMN08938554
1153	Sample: 1153, Grandmother: B9-001, Grandfather: S-041, Mother: BxS #1, Father: BxS #7, Population: ellsu_17, Exome capture sequencing of seedling leaf tissue	1153	B9-001	S-041	BxS #1	BxS #7	ellsu_17	1				SAMN08938555
1154	Sample: 1154, Grandmother: B9-001, Grandfather: S-041, Mother: BxS #1, Father: BxS #7, Population: ellsu_17, Exome capture sequencing of seedling leaf tissue	1154	B9-001	S-041	BxS #1	BxS #7	ellsu_17	1				SAMN08938556
1155	Sample: 1155, Grandmother: B9-001, Grandfather: S-041, Mother: BxS #1, Father: BxS #7, Population: ellsu_17, Exome capture sequencing of seedling leaf tissue	1155	B9-001	S-041	BxS #1	BxS #7	ellsu_17	1				SAMN08938557
1156	Sample: 1156, Grandmother: B9-001, Grandfather: S-041, Mother: BxS #1, Father: BxS #7, Population: ellsu_17, Exome capture sequencing of seedling leaf tissue	1156	B9-001	S-041	BxS #1	BxS #7	ellsu_17	1				SAMN08938558
1157	Sample: 1157, Grandmother: B9-001, Grandfather: S-041, Mother: BxS #1, Father: BxS #7, Population: ellsu_17, Exome capture sequencing of seedling leaf tissue	1157	B9-001	S-041	BxS #1	BxS #7	ellsu_17	1				SAMN08938559
1158	Sample: 1158, Grandmother: B9-001, Grandfather: S-041, Mother: BxS #1, Father: BxS #7, Population: ellsu_17, Exome capture sequencing of seedling leaf tissue	1158	B9-001	S-041	BxS #1	BxS #7	ellsu_17	1				SAMN08938560
1159	Sample: 1159, Grandmother: B9-001, Grandfather: S-041, Mother: BxS #1, Father: BxS #7, Population: ellsu_17, Exome capture sequencing of seedling leaf tissue	1159	B9-001	S-041	BxS #1	BxS #7	ellsu_17	1				SAMN08938561
1160	Sample: 1160, Grandmother: B9-001, Grandfather: S-041, Mother: BxS #1, Father: BxS #7, Population: ellsu_17, Exome capture sequencing of seedling leaf tissue	1160	B9-001	S-041	BxS #1	BxS #7	ellsu_17	1				SAMN08938562
1161	Sample: 1161, Grandmother: B9-001, Grandfather: S-041, Mother: BxS #1, Father: BxS #7, Population: ellsu_17, Exome capture sequencing of seedling leaf tissue	1161	B9-001	S-041	BxS #1	BxS #7	ellsu_17	1				SAMN08938563
1162	Sample: 1162, Grandmother: B9-001, Grandfather: S-041, Mother: BxS #1, Father: BxS #7, Population: ellsu_17, Exome capture sequencing of seedling leaf tissue	1162	B9-001	S-041	BxS #1	BxS #7	ellsu_17	1				SAMN08938564
1163	Sample: 1163, Grandmother: B9-001, Grandfather: S-041, Mother: BxS #1, Father: BxS #7, Population: ellsu_17, Exome capture sequencing of seedling leaf tissue	1163	B9-001	S-041	BxS #1	BxS #7	ellsu_17	1				SAMN08938565
1164	Sample: 1164, Grandmother: B9-001, Grandfather: S-041, Mother: BxS #1, Father: BxS #7, Population: ellsu_17, Exome capture sequencing of seedling leaf tissue	1164	B9-001	S-041	BxS #1	BxS #7	ellsu_17	1				SAMN08938566
1165	Sample: 1165, Grandmother: B9-001, Grandfather: S-041, Mother: BxS #1, Father: BxS #7, Population: ellsu_17, Exome capture sequencing of seedling leaf tissue	1165	B9-001	S-041	BxS #1	BxS #7	ellsu_17	1				SAMN08938567
1166	Sample: 1166, Grandmother: B9-001, Grandfather: S-041, Mother: BxS #1, Father: BxS #7, Population: ellsu_17, Exome capture sequencing of seedling leaf tissue	1166	B9-001	S-041	BxS #1	BxS #7	ellsu_17	1				SAMN08938568
1167	Sample: 1167, Grandmother: B9-001, Grandfather: S-041, Mother: BxS #1, Father: BxS #7, Population: ellsu_17, Exome capture sequencing of seedling leaf tissue	1167	B9-001	S-041	BxS #1	BxS #7	ellsu_17	1				SAMN08938569
1168	Sample: 1168, Grandmother: B9-001, Grandfather: S-041, Mother: BxS #1, Father: BxS #7, Population: ellsu_17, Exome capture sequencing of seedling leaf tissue	1168	B9-001	S-041	BxS #1	BxS #7	ellsu_17	1				SAMN08938570
1169	Sample: 1169, Grandmother: B9-001, Grandfather: S-041, Mother: BxS #1, Father: BxS #7, Population: ellsu_17, Exome capture sequencing of seedling leaf tissue	1169	B9-001	S-041	BxS #1	BxS #7	ellsu_17	1				SAMN08938571
1170	Sample: 1170, Grandmother: B9-001, Grandfather: S-041, Mother: BxS #1, Father: BxS #7, Population: ellsu_17, Exome capture sequencing of seedling leaf tissue	1170	B9-001	S-041	BxS #1	BxS #7	ellsu_17	1				SAMN08938572
1171	Sample: 1171, Grandmother: B9-001, Grandfather: S-041, Mother: BxS #1, Father: BxS #7, Population: ellsu_17, Exome capture sequencing of seedling leaf tissue	1171	B9-001	S-041	BxS #1	BxS #7	ellsu_17	1				SAMN08938573
1173	Sample: 1173, Grandmother: B9-001, Grandfather: S-041, Mother: BxS #1, Father: BxS #7, Population: ellsu_17, Exome capture sequencing of seedling leaf tissue	1173	B9-001	S-041	BxS #1	BxS #7	ellsu_17	1				SAMN08938574
1174	Sample: 1174, Grandmother: B9-001, Grandfather: S-041, Mother: BxS #1, Father: BxS #7, Population: ellsu_17, Exome capture sequencing of seedling leaf tissue	1174	B9-001	S-041	BxS #1	BxS #7	ellsu_17	1				SAMN08938575
1175	Sample: 1175, Grandmother: B9-001, Grandfather: S-041, Mother: BxS #1, Father: BxS #7, Population: ellsu_17, Exome capture sequencing of seedling leaf tissue	1175	B9-001	S-041	BxS #1	BxS #7	ellsu_17	1				SAMN08938576
1176	Sample: 1176, Grandmother: B9-001, Grandfather: S-041, Mother: BxS #1, Father: BxS #7, Population: ellsu_17, Exome capture sequencing of seedling leaf tissue	1176	B9-001	S-041	BxS #1	BxS #7	ellsu_17	1				SAMN08938577
1177	Sample: 1177, Grandmother: B9-001, Grandfather: S-041, Mother: BxS #1, Father: BxS #7, Population: ellsu_17, Exome capture sequencing of seedling leaf tissue	1177	B9-001	S-041	BxS #1	BxS #7	ellsu_17	1				SAMN08938578
1178	Sample: 1178, Grandmother: B9-001, Grandfather: S-041, Mother: BxS #1, Father: BxS #7, Population: ellsu_17, Exome capture sequencing of seedling leaf tissue	1178	B9-001	S-041	BxS #1	BxS #7	ellsu_17	1				SAMN08938579
1179	Sample: 1179, Grandmother: B9-001, Grandfather: S-041, Mother: BxS #1, Father: BxS #7, Population: ellsu_17, Exome capture sequencing of seedling leaf tissue	1179	B9-001	S-041	BxS #1	BxS #7	ellsu_17	1				SAMN08938580
1180	Sample: 1180, Grandmother: B9-001, Grandfather: S-041, Mother: BxS #1, Father: BxS #7, Population: ellsu_17, Exome capture sequencing of seedling leaf tissue	1180	B9-001	S-041	BxS #1	BxS #7	ellsu_17	1				SAMN08938581
1181	Sample: 1181, Grandmother: B9-001, Grandfather: S-041, Mother: BxS #1, Father: BxS #7, Population: ellsu_17, Exome capture sequencing of seedling leaf tissue	1181	B9-001	S-041	BxS #1	BxS #7	ellsu_17	1				SAMN08938582
1182	Sample: 1182, Grandmother: B9-001, Grandfather: S-041, Mother: BxS #1, Father: BxS #7, Population: ellsu_17, Exome capture sequencing of seedling leaf tissue	1182	B9-001	S-041	BxS #1	BxS #7	ellsu_17	1				SAMN08938583
1183	Sample: 1183, Grandmother: B9-001, Grandfather: S-041, Mother: BxS #1, Father: BxS #7, Population: ellsu_17, Exome capture sequencing of seedling leaf tissue	1183	B9-001	S-041	BxS #1	BxS #7	ellsu_17	1				SAMN08938584
1184	Sample: 1184, Grandmother: B9-001, Grandfather: S-041, Mother: BxS #1, Father: BxS #7, Population: ellsu_17, Exome capture sequencing of seedling leaf tissue	1184	B9-001	S-041	BxS #1	BxS #7	ellsu_17	1				SAMN08938585
1185	Sample: 1185, Grandmother: B9-001, Grandfather: S-041, Mother: BxS #1, Father: BxS #7, Population: ellsu_17, Exome capture sequencing of seedling leaf tissue	1185	B9-001	S-041	BxS #1	BxS #7	ellsu_17	1				SAMN08938586
1186	Sample: 1186, Grandmother: B9-001, Grandfather: S-041, Mother: BxS #1, Father: BxS #7, Population: ellsu_17, Exome capture sequencing of seedling leaf tissue	1186	B9-001	S-041	BxS #1	BxS #7	ellsu_17	1				SAMN08938587
1187	Sample: 1187, Grandmother: B9-001, Grandfather: S-041, Mother: BxS #1, Father: BxS #7, Population: ellsu_17, Exome capture sequencing of seedling leaf tissue	1187	B9-001	S-041	BxS #1	BxS #7	ellsu_17	1				SAMN08938588
1188	Sample: 1188, Grandmother: B9-001, Grandfather: S-041, Mother: BxS #1, Father: BxS #7, Population: ellsu_17, Exome capture sequencing of seedling leaf tissue	1188	B9-001	S-041	BxS #1	BxS #7	ellsu_17	1				SAMN08938589
1189	Sample: 1189, Grandmother: B9-001, Grandfather: S-041, Mother: BxS #1, Father: BxS #7, Population: ellsu_17, Exome capture sequencing of seedling leaf tissue	1189	B9-001	S-041	BxS #1	BxS #7	ellsu_17	1				SAMN08938590
1190	Sample: 1190, Grandmother: B9-001, Grandfather: S-041, Mother: BxS #1, Father: BxS #7, Population: ellsu_17, Exome capture sequencing of seedling leaf tissue	1190	B9-001	S-041	BxS #1	BxS #7	ellsu_17	1				SAMN08938591
1191	Sample: 1191, Grandmother: B9-001, Grandfather: S-041, Mother: BxS #1, Father: BxS #7, Population: ellsu_17, Exome capture sequencing of seedling leaf tissue	1191	B9-001	S-041	BxS #1	BxS #7	ellsu_17	1				SAMN08938592
1192	Sample: 1192, Grandmother: B9-001, Grandfather: S-041, Mother: BxS #1, Father: BxS #7, Population: ellsu_17, Exome capture sequencing of seedling leaf tissue	1192	B9-001	S-041	BxS #1	BxS #7	ellsu_17	1				SAMN08938593
1193	Sample: 1193, Grandmother: B9-001, Grandfather: S-041, Mother: BxS #1, Father: BxS #7, Population: ellsu_17, Exome capture sequencing of seedling leaf tissue	1193	B9-001	S-041	BxS #1	BxS #7	ellsu_17	1				SAMN08938594
1194	Sample: 1194, Grandmother: B9-001, Grandfather: S-041, Mother: BxS #1, Father: BxS #7, Population: ellsu_17, Exome capture sequencing of seedling leaf tissue	1194	B9-001	S-041	BxS #1	BxS #7	ellsu_17	1				SAMN08938595
1195	Sample: 1195, Grandmother: B9-001, Grandfather: S-041, Mother: BxS #1, Father: BxS #7, Population: ellsu_17, Exome capture sequencing of seedling leaf tissue	1195	B9-001	S-041	BxS #1	BxS #7	ellsu_17	1				SAMN08938596
1196	Sample: 1196, Grandmother: B9-001, Grandfather: S-041, Mother: BxS #1, Father: BxS #7, Population: ellsu_17, Exome capture sequencing of seedling leaf tissue	1196	B9-001	S-041	BxS #1	BxS #7	ellsu_17	1				SAMN08938597
1197	Sample: 1197, Grandmother: B9-001, Grandfather: S-041, Mother: BxS #1, Father: BxS #7, Population: ellsu_17, Exome capture sequencing of seedling leaf tissue	1197	B9-001	S-041	BxS #1	BxS #7	ellsu_17	1				SAMN08938598
1198	Sample: 1198, Grandmother: B9-001, Grandfather: S-041, Mother: BxS #1, Father: BxS #7, Population: ellsu_17, Exome capture sequencing of seedling leaf tissue	1198	B9-001	S-041	BxS #1	BxS #7	ellsu_17	1				SAMN08938599
1199	Sample: 1199, Grandmother: B9-001, Grandfather: S-041, Mother: BxS #1, Father: BxS #7, Population: ellsu_17, Exome capture sequencing of seedling leaf tissue	1199	B9-001	S-041	BxS #1	BxS #7	ellsu_17	1				SAMN08938600
1200	Sample: 1200, Grandmother: B9-001, Grandfather: S-041, Mother: BxS #1, Father: BxS #7, Population: ellsu_17, Exome capture sequencing of seedling leaf tissue	1200	B9-001	S-041	BxS #1	BxS #7	ellsu_17	1				SAMN08938601
1201	Sample: 1201, Grandmother: B9-001, Grandfather: S-041, Mother: BxS #1, Father: BxS #7, Population: ellsu_17, Exome capture sequencing of seedling leaf tissue	1201	B9-001	S-041	BxS #1	BxS #7	ellsu_17	1				SAMN08938602
1202	Sample: 1202, Grandmother: B9-001, Grandfather: S-041, Mother: BxS #1, Father: BxS #7, Population: ellsu_17, Exome capture sequencing of seedling leaf tissue	1202	B9-001	S-041	BxS #1	BxS #7	ellsu_17	1				SAMN08938603
1203	Sample: 1203, Grandmother: B9-001, Grandfather: S-041, Mother: BxS #1, Father: BxS #7, Population: ellsu_17, Exome capture sequencing of seedling leaf tissue	1203	B9-001	S-041	BxS #1	BxS #7	ellsu_17	1				SAMN08938604
1204	Sample: 1204, Grandmother: B9-001, Grandfather: S-041, Mother: BxS #1, Father: BxS #7, Population: ellsu_17, Exome capture sequencing of seedling leaf tissue	1204	B9-001	S-041	BxS #1	BxS #7	ellsu_17	1				SAMN08938605
1205	Sample: 1205, Grandmother: B9-001, Grandfather: S-041, Mother: BxS #1, Father: BxS #7, Population: ellsu_17, Exome capture sequencing of seedling leaf tissue	1205	B9-001	S-041	BxS #1	BxS #7	ellsu_17	1				SAMN08938606
1206	Sample: 1206, Grandmother: B9-001, Grandfather: S-041, Mother: BxS #1, Father: BxS #7, Population: ellsu_17, Exome capture sequencing of seedling leaf tissue	1206	B9-001	S-041	BxS #1	BxS #7	ellsu_17	1				SAMN08938607
1207	Sample: 1207, Grandmother: B9-001, Grandfather: S-041, Mother: BxS #1, Father: BxS #7, Population: ellsu_17, Exome capture sequencing of seedling leaf tissue	1207	B9-001	S-041	BxS #1	BxS #7	ellsu_17	1				SAMN08938608
1208	Sample: 1208, Grandmother: B9-001, Grandfather: S-041, Mother: BxS #1, Father: BxS #7, Population: ellsu_17, Exome capture sequencing of seedling leaf tissue	1208	B9-001	S-041	BxS #1	BxS #7	ellsu_17	1				SAMN08938609
1209	Sample: 1209, Grandmother: B9-001, Grandfather: S-041, Mother: BxS #1, Father: BxS #7, Population: ellsu_17, Exome capture sequencing of seedling leaf tissue	1209	B9-001	S-041	BxS #1	BxS #7	ellsu_17	1				SAMN08938610
1210	Sample: 1210, Grandmother: B9-001, Grandfather: S-041, Mother: BxS #1, Father: BxS #7, Population: ellsu_17, Exome capture sequencing of seedling leaf tissue	1210	B9-001	S-041	BxS #1	BxS #7	ellsu_17	1				SAMN08938611
1211	Sample: 1211, Grandmother: B9-001, Grandfather: S-041, Mother: BxS #1, Father: BxS #7, Population: ellsu_17, Exome capture sequencing of seedling leaf tissue	1211	B9-001	S-041	BxS #1	BxS #7	ellsu_17	1				SAMN08938612
1212	Sample: 1212, Grandmother: B9-001, Grandfather: S-041, Mother: BxS #1, Father: BxS #7, Population: ellsu_17, Exome capture sequencing of seedling leaf tissue	1212	B9-001	S-041	BxS #1	BxS #7	ellsu_17	1				SAMN08938613
1213	Sample: 1213, Grandmother: B9-001, Grandfather: S-041, Mother: BxS #1, Father: BxS #7, Population: ellsu_17, Exome capture sequencing of seedling leaf tissue	1213	B9-001	S-041	BxS #1	BxS #7	ellsu_17	1				SAMN08938614
1214	Sample: 1214, Grandmother: B9-001, Grandfather: S-041, Mother: BxS #1, Father: BxS #7, Population: ellsu_17, Exome capture sequencing of seedling leaf tissue	1214	B9-001	S-041	BxS #1	BxS #7	ellsu_17	1				SAMN08938615
1216	Sample: 1216, Grandmother: B9-001, Grandfather: S-041, Mother: BxS #1, Father: BxS #7, Population: ellsu_17, Exome capture sequencing of seedling leaf tissue	1216	B9-001	S-041	BxS #1	BxS #7	ellsu_17	1				SAMN08938616
1217	Sample: 1217, Grandmother: B9-001, Grandfather: S-041, Mother: BxS #1, Father: BxS #7, Population: ellsu_17, Exome capture sequencing of seedling leaf tissue	1217	B9-001	S-041	BxS #1	BxS #7	ellsu_17	1				SAMN08938617
1218	Sample: 1218, Grandmother: B9-001, Grandfather: S-041, Mother: BxS #1, Father: BxS #7, Population: ellsu_17, Exome capture sequencing of seedling leaf tissue	1218	B9-001	S-041	BxS #1	BxS #7	ellsu_17	1				SAMN08938618
1219	Sample: 1219, Grandmother: B9-001, Grandfather: S-041, Mother: BxS #1, Father: BxS #7, Population: ellsu_17, Exome capture sequencing of seedling leaf tissue	1219	B9-001	S-041	BxS #1	BxS #7	ellsu_17	1				SAMN08938619
1220	Sample: 1220, Grandmother: B9-001, Grandfather: S-041, Mother: BxS #1, Father: BxS #7, Population: ellsu_17, Exome capture sequencing of seedling leaf tissue	1220	B9-001	S-041	BxS #1	BxS #7	ellsu_17	1				SAMN08938620
1221	Sample: 1221, Grandmother: B9-001, Grandfather: S-041, Mother: BxS #1, Father: BxS #7, Population: ellsu_17, Exome capture sequencing of seedling leaf tissue	1221	B9-001	S-041	BxS #1	BxS #7	ellsu_17	1				SAMN08938621
1223	Sample: 1223, Grandmother: B9-001, Grandfather: S-041, Mother: BxS #1, Father: BxS #7, Population: ellsu_17, Exome capture sequencing of seedling leaf tissue	1223	B9-001	S-041	BxS #1	BxS #7	ellsu_17	1				SAMN08938622
1224	Sample: 1224, Grandmother: B9-001, Grandfather: S-041, Mother: BxS #1, Father: BxS #7, Population: ellsu_17, Exome capture sequencing of seedling leaf tissue	1224	B9-001	S-041	BxS #1	BxS #7	ellsu_17	1				SAMN08938623
1225	Sample: 1225, Grandmother: B9-001, Grandfather: S-041, Mother: BxS #1, Father: BxS #7, Population: ellsu_17, Exome capture sequencing of seedling leaf tissue	1225	B9-001	S-041	BxS #1	BxS #7	ellsu_17	1				SAMN08938624
1226	Sample: 1226, Grandmother: B9-001, Grandfather: S-041, Mother: BxS #1, Father: BxS #7, Population: ellsu_17, Exome capture sequencing of seedling leaf tissue	1226	B9-001	S-041	BxS #1	BxS #7	ellsu_17	1				SAMN08938625
1227	Sample: 1227, Grandmother: B9-001, Grandfather: S-041, Mother: BxS #1, Father: BxS #7, Population: ellsu_17, Exome capture sequencing of seedling leaf tissue	1227	B9-001	S-041	BxS #1	BxS #7	ellsu_17	1				SAMN08938626
1228	Sample: 1228, Grandmother: B9-001, Grandfather: S-041, Mother: BxS #1, Father: BxS #7, Population: ellsu_17, Exome capture sequencing of seedling leaf tissue	1228	B9-001	S-041	BxS #1	BxS #7	ellsu_17	1				SAMN08938627
1229	Sample: 1229, Grandmother: B9-001, Grandfather: S-041, Mother: BxS #1, Father: BxS #7, Population: ellsu_17, Exome capture sequencing of seedling leaf tissue	1229	B9-001	S-041	BxS #1	BxS #7	ellsu_17	1				SAMN08938628
1230	Sample: 1230, Grandmother: B9-001, Grandfather: S-041, Mother: BxS #1, Father: BxS #7, Population: ellsu_17, Exome capture sequencing of seedling leaf tissue	1230	B9-001	S-041	BxS #1	BxS #7	ellsu_17	1				SAMN08938629
1231	Sample: 1231, Grandmother: B9-001, Grandfather: S-041, Mother: BxS #1, Father: BxS #7, Population: ellsu_17, Exome capture sequencing of seedling leaf tissue	1231	B9-001	S-041	BxS #1	BxS #7	ellsu_17	1				SAMN08938630
1232	Sample: 1232, Grandmother: B9-001, Grandfather: S-041, Mother: BxS #1, Father: BxS #7, Population: ellsu_17, Exome capture sequencing of seedling leaf tissue	1232	B9-001	S-041	BxS #1	BxS #7	ellsu_17	1				SAMN08938631
1233	Sample: 1233, Grandmother: B9-001, Grandfather: S-041, Mother: BxS #1, Father: BxS #7, Population: ellsu_17, Exome capture sequencing of seedling leaf tissue	1233	B9-001	S-041	BxS #1	BxS #7	ellsu_17	1				SAMN08938632
1234	Sample: 1234, Grandmother: B9-001, Grandfather: S-041, Mother: BxS #1, Father: BxS #7, Population: ellsu_17, Exome capture sequencing of seedling leaf tissue	1234	B9-001	S-041	BxS #1	BxS #7	ellsu_17	1				SAMN08938633
1235	Sample: 1235, Grandmother: B9-001, Grandfather: S-041, Mother: BxS #1, Father: BxS #7, Population: ellsu_17, Exome capture sequencing of seedling leaf tissue	1235	B9-001	S-041	BxS #1	BxS #7	ellsu_17	1				SAMN08938634
1236	Sample: 1236, Grandmother: B9-001, Grandfather: S-041, Mother: BxS #1, Father: BxS #7, Population: ellsu_17, Exome capture sequencing of seedling leaf tissue	1236	B9-001	S-041	BxS #1	BxS #7	ellsu_17	1				SAMN08938635
1237	Sample: 1237, Grandmother: B9-001, Grandfather: S-041, Mother: BxS #1, Father: BxS #7, Population: ellsu_17, Exome capture sequencing of seedling leaf tissue	1237	B9-001	S-041	BxS #1	BxS #7	ellsu_17	1				SAMN08938636
1238	Sample: 1238, Grandmother: B9-001, Grandfather: S-041, Mother: BxS #1, Father: BxS #7, Population: ellsu_17, Exome capture sequencing of seedling leaf tissue	1238	B9-001	S-041	BxS #1	BxS #7	ellsu_17	1				SAMN08938637
1239	Sample: 1239, Grandmother: B9-001, Grandfather: S-041, Mother: BxS #1, Father: BxS #7, Population: ellsu_17, Exome capture sequencing of seedling leaf tissue	1239	B9-001	S-041	BxS #1	BxS #7	ellsu_17	1				SAMN08938638
1240	Sample: 1240, Grandmother: B9-001, Grandfather: S-041, Mother: BxS #1, Father: BxS #7, Population: ellsu_17, Exome capture sequencing of seedling leaf tissue	1240	B9-001	S-041	BxS #1	BxS #7	ellsu_17	1				SAMN08938639
1241	Sample: 1241, Grandmother: B9-001, Grandfather: S-041, Mother: BxS #1, Father: BxS #7, Population: ellsu_17, Exome capture sequencing of seedling leaf tissue	1241	B9-001	S-041	BxS #1	BxS #7	ellsu_17	1				SAMN08938640
1242	Sample: 1242, Grandmother: B9-001, Grandfather: S-041, Mother: BxS #1, Father: BxS #7, Population: ellsu_17, Exome capture sequencing of seedling leaf tissue	1242	B9-001	S-041	BxS #1	BxS #7	ellsu_17	1				SAMN08938641
1243	Sample: 1243, Grandmother: B9-001, Grandfather: S-041, Mother: BxS #1, Father: BxS #7, Population: ellsu_17, Exome capture sequencing of seedling leaf tissue	1243	B9-001	S-041	BxS #1	BxS #7	ellsu_17	1				SAMN08938642
1244	Sample: 1244, Grandmother: B9-001, Grandfather: S-041, Mother: BxS #1, Father: BxS #7, Population: ellsu_17, Exome capture sequencing of seedling leaf tissue	1244	B9-001	S-041	BxS #1	BxS #7	ellsu_17	1				SAMN08938643
1245	Sample: 1245, Grandmother: B9-001, Grandfather: S-041, Mother: BxS #1, Father: BxS #7, Population: ellsu_17, Exome capture sequencing of seedling leaf tissue	1245	B9-001	S-041	BxS #1	BxS #7	ellsu_17	1				SAMN08938644
1246	Sample: 1246, Grandmother: B9-001, Grandfather: S-041, Mother: BxS #1, Father: BxS #7, Population: ellsu_17, Exome capture sequencing of seedling leaf tissue	1246	B9-001	S-041	BxS #1	BxS #7	ellsu_17	1				SAMN08938645
1247	Sample: 1247, Grandmother: B9-001, Grandfather: S-041, Mother: BxS #1, Father: BxS #7, Population: ellsu_17, Exome capture sequencing of seedling leaf tissue	1247	B9-001	S-041	BxS #1	BxS #7	ellsu_17	1				SAMN08938646
1248	Sample: 1248, Grandmother: B9-001, Grandfather: S-041, Mother: BxS #1, Father: BxS #7, Population: ellsu_17, Exome capture sequencing of seedling leaf tissue	1248	B9-001	S-041	BxS #1	BxS #7	ellsu_17	1				SAMN08938647
1249	Sample: 1249, Grandmother: B9-001, Grandfather: S-041, Mother: BxS #1, Father: BxS #7, Population: ellsu_17, Exome capture sequencing of seedling leaf tissue	1249	B9-001	S-041	BxS #1	BxS #7	ellsu_17	1				SAMN08938648
1250	Sample: 1250, Grandmother: B9-001, Grandfather: S-041, Mother: BxS #1, Father: BxS #7, Population: ellsu_17, Exome capture sequencing of seedling leaf tissue	1250	B9-001	S-041	BxS #1	BxS #7	ellsu_17	1				SAMN08938649
1251	Sample: 1251, Grandmother: B9-001, Grandfather: S-041, Mother: BxS #1, Father: BxS #7, Population: ellsu_17, Exome capture sequencing of seedling leaf tissue	1251	B9-001	S-041	BxS #1	BxS #7	ellsu_17	1				SAMN08938650
1252	Sample: 1252, Grandmother: B9-001, Grandfather: S-041, Mother: BxS #1, Father: BxS #7, Population: ellsu_17, Exome capture sequencing of seedling leaf tissue	1252	B9-001	S-041	BxS #1	BxS #7	ellsu_17	1				SAMN08938651
1253	Sample: 1253, Grandmother: B9-001, Grandfather: S-041, Mother: BxS #1, Father: BxS #7, Population: ellsu_17, Exome capture sequencing of seedling leaf tissue	1253	B9-001	S-041	BxS #1	BxS #7	ellsu_17	1				SAMN08938652
1254	Sample: 1254, Grandmother: B9-001, Grandfather: S-041, Mother: BxS #1, Father: BxS #7, Population: ellsu_17, Exome capture sequencing of seedling leaf tissue	1254	B9-001	S-041	BxS #1	BxS #7	ellsu_17	1				SAMN08938653
1255	Sample: 1255, Grandmother: B9-001, Grandfather: S-041, Mother: BxS #1, Father: BxS #7, Population: ellsu_17, Exome capture sequencing of seedling leaf tissue	1255	B9-001	S-041	BxS #1	BxS #7	ellsu_17	1				SAMN08938654
1256	Sample: 1256, Grandmother: B9-001, Grandfather: S-041, Mother: BxS #1, Father: BxS #7, Population: ellsu_17, Exome capture sequencing of seedling leaf tissue	1256	B9-001	S-041	BxS #1	BxS #7	ellsu_17	1				SAMN08938655
1257	Sample: 1257, Grandmother: B9-001, Grandfather: S-041, Mother: BxS #1, Father: BxS #7, Population: ellsu_17, Exome capture sequencing of seedling leaf tissue	1257	B9-001	S-041	BxS #1	BxS #7	ellsu_17	1				SAMN08938656
1258	Sample: 1258, Grandmother: B9-001, Grandfather: S-041, Mother: BxS #1, Father: BxS #7, Population: ellsu_17, Exome capture sequencing of seedling leaf tissue	1258	B9-001	S-041	BxS #1	BxS #7	ellsu_17	1				SAMN08938657
1259	Sample: 1259, Grandmother: B9-001, Grandfather: S-041, Mother: BxS #1, Father: BxS #7, Population: ellsu_17, Exome capture sequencing of seedling leaf tissue	1259	B9-001	S-041	BxS #1	BxS #7	ellsu_17	1				SAMN08938658
1260	Sample: 1260, Grandmother: B9-001, Grandfather: S-041, Mother: BxS #1, Father: BxS #7, Population: ellsu_17, Exome capture sequencing of seedling leaf tissue	1260	B9-001	S-041	BxS #1	BxS #7	ellsu_17	1				SAMN08938659
1261	Sample: 1261, Grandmother: B9-001, Grandfather: S-041, Mother: BxS #1, Father: BxS #7, Population: ellsu_17, Exome capture sequencing of seedling leaf tissue	1261	B9-001	S-041	BxS #1	BxS #7	ellsu_17	1				SAMN08938660
1262	Sample: 1262, Grandmother: B9-001, Grandfather: S-041, Mother: BxS #1, Father: BxS #7, Population: ellsu_17, Exome capture sequencing of seedling leaf tissue	1262	B9-001	S-041	BxS #1	BxS #7	ellsu_17	1				SAMN08938661
1263	Sample: 1263, Grandmother: B9-001, Grandfather: S-041, Mother: BxS #1, Father: BxS #7, Population: ellsu_17, Exome capture sequencing of seedling leaf tissue	1263	B9-001	S-041	BxS #1	BxS #7	ellsu_17	1				SAMN08938662
1264	Sample: 1264, Grandmother: B9-001, Grandfather: S-041, Mother: BxS #1, Father: BxS #7, Population: ellsu_17, Exome capture sequencing of seedling leaf tissue	1264	B9-001	S-041	BxS #1	BxS #7	ellsu_17	1				SAMN08938663
1265	Sample: 1265, Grandmother: B9-001, Grandfather: S-041, Mother: BxS #1, Father: BxS #7, Population: ellsu_17, Exome capture sequencing of seedling leaf tissue	1265	B9-001	S-041	BxS #1	BxS #7	ellsu_17	1				SAMN08938664
1266	Sample: 1266, Grandmother: B9-001, Grandfather: S-041, Mother: BxS #1, Father: BxS #7, Population: ellsu_17, Exome capture sequencing of seedling leaf tissue	1266	B9-001	S-041	BxS #1	BxS #7	ellsu_17	1				SAMN08938665
1267	Sample: 1267, Grandmother: B9-001, Grandfather: S-041, Mother: BxS #1, Father: BxS #7, Population: ellsu_17, Exome capture sequencing of seedling leaf tissue	1267	B9-001	S-041	BxS #1	BxS #7	ellsu_17	1				SAMN08938666
1268	Sample: 1268, Grandmother: B9-001, Grandfather: S-041, Mother: BxS #1, Father: BxS #7, Population: ellsu_17, Exome capture sequencing of seedling leaf tissue	1268	B9-001	S-041	BxS #1	BxS #7	ellsu_17	1				SAMN08938667
1269	Sample: 1269, Grandmother: B9-001, Grandfather: S-041, Mother: BxS #1, Father: BxS #7, Population: ellsu_17, Exome capture sequencing of seedling leaf tissue	1269	B9-001	S-041	BxS #1	BxS #7	ellsu_17	1				SAMN08938668
1270	Sample: 1270, Grandmother: B9-001, Grandfather: S-041, Mother: BxS #1, Father: BxS #7, Population: ellsu_17, Exome capture sequencing of seedling leaf tissue	1270	B9-001	S-041	BxS #1	BxS #7	ellsu_17	1				SAMN08938669
1271	Sample: 1271, Grandmother: B9-001, Grandfather: S-041, Mother: BxS #1, Father: BxS #7, Population: ellsu_17, Exome capture sequencing of seedling leaf tissue	1271	B9-001	S-041	BxS #1	BxS #7	ellsu_17	1				SAMN08938670
1273	Sample: 1273, Grandmother: B9-001, Grandfather: S-041, Mother: BxS #1, Father: BxS #7, Population: ellsu_17, Exome capture sequencing of seedling leaf tissue	1273	B9-001	S-041	BxS #1	BxS #7	ellsu_17	1				SAMN08938671
1274	Sample: 1274, Grandmother: B9-001, Grandfather: S-041, Mother: BxS #1, Father: BxS #7, Population: ellsu_17, Exome capture sequencing of seedling leaf tissue	1274	B9-001	S-041	BxS #1	BxS #7	ellsu_17	1				SAMN08938672
1275	Sample: 1275, Grandmother: B9-001, Grandfather: S-041, Mother: BxS #1, Father: BxS #7, Population: ellsu_17, Exome capture sequencing of seedling leaf tissue	1275	B9-001	S-041	BxS #1	BxS #7	ellsu_17	1				SAMN08938673
1276	Sample: 1276, Grandmother: B9-001, Grandfather: S-041, Mother: BxS #1, Father: BxS #7, Population: ellsu_17, Exome capture sequencing of seedling leaf tissue	1276	B9-001	S-041	BxS #1	BxS #7	ellsu_17	1				SAMN08938674
1277	Sample: 1277, Grandmother: B9-001, Grandfather: S-041, Mother: BxS #1, Father: BxS #7, Population: ellsu_17, Exome capture sequencing of seedling leaf tissue	1277	B9-001	S-041	BxS #1	BxS #7	ellsu_17	1				SAMN08938675
1278	Sample: 1278, Grandmother: B9-001, Grandfather: S-041, Mother: BxS #1, Father: BxS #7, Population: ellsu_17, Exome capture sequencing of seedling leaf tissue	1278	B9-001	S-041	BxS #1	BxS #7	ellsu_17	1				SAMN08938676
1279	Sample: 1279, Grandmother: B9-001, Grandfather: S-041, Mother: BxS #1, Father: BxS #7, Population: ellsu_17, Exome capture sequencing of seedling leaf tissue	1279	B9-001	S-041	BxS #1	BxS #7	ellsu_17	1				SAMN08938677
1280	Sample: 1280, Grandmother: B9-001, Grandfather: S-041, Mother: BxS #1, Father: BxS #7, Population: ellsu_17, Exome capture sequencing of seedling leaf tissue	1280	B9-001	S-041	BxS #1	BxS #7	ellsu_17	1				SAMN08938678
1282	Sample: 1282, Grandmother: B9-001, Grandfather: S-041, Mother: BxS #1, Father: BxS #7, Population: ellsu_17, Exome capture sequencing of seedling leaf tissue	1282	B9-001	S-041	BxS #1	BxS #7	ellsu_17	1				SAMN08938679
1283	Sample: 1283, Grandmother: B9-001, Grandfather: S-041, Mother: BxS #1, Father: BxS #7, Population: ellsu_17, Exome capture sequencing of seedling leaf tissue	1283	B9-001	S-041	BxS #1	BxS #7	ellsu_17	1				SAMN08938680
1284	Sample: 1284, Grandmother: B9-001, Grandfather: S-041, Mother: BxS #1, Father: BxS #7, Population: ellsu_17, Exome capture sequencing of seedling leaf tissue	1284	B9-001	S-041	BxS #1	BxS #7	ellsu_17	1				SAMN08938681
1285	Sample: 1285, Grandmother: B9-001, Grandfather: S-041, Mother: BxS #1, Father: BxS #7, Population: ellsu_17, Exome capture sequencing of seedling leaf tissue	1285	B9-001	S-041	BxS #1	BxS #7	ellsu_17	1				SAMN08938682
1286	Sample: 1286, Grandmother: B9-001, Grandfather: S-041, Mother: BxS #1, Father: BxS #7, Population: ellsu_17, Exome capture sequencing of seedling leaf tissue	1286	B9-001	S-041	BxS #1	BxS #7	ellsu_17	1				SAMN08938683
1287	Sample: 1287, Grandmother: B9-001, Grandfather: S-041, Mother: BxS #1, Father: BxS #7, Population: ellsu_17, Exome capture sequencing of seedling leaf tissue	1287	B9-001	S-041	BxS #1	BxS #7	ellsu_17	1				SAMN08938684
1288	Sample: 1288, Grandmother: B9-001, Grandfather: S-041, Mother: BxS #1, Father: BxS #7, Population: ellsu_17, Exome capture sequencing of seedling leaf tissue	1288	B9-001	S-041	BxS #1	BxS #7	ellsu_17	1				SAMN08938685
1290	Sample: 1290, Grandmother: B9-001, Grandfather: S-041, Mother: BxS #1, Father: BxS #7, Population: ellsu_17, Exome capture sequencing of seedling leaf tissue	1290	B9-001	S-041	BxS #1	BxS #7	ellsu_17	1				SAMN08938686
1291	Sample: 1291, Grandmother: B9-001, Grandfather: S-041, Mother: BxS #1, Father: BxS #7, Population: ellsu_17, Exome capture sequencing of seedling leaf tissue	1291	B9-001	S-041	BxS #1	BxS #7	ellsu_17	1				SAMN08938687
1296	Sample: 1296, Grandmother: B9-001, Grandfather: S-041, Mother: BxS #1, Father: BxS #7, Population: ellsu_17, Exome capture sequencing of seedling leaf tissue	1296	B9-001	S-041	BxS #1	BxS #7	ellsu_17	1				SAMN08938688
1297	Sample: 1297, Grandmother: B9-001, Grandfather: S-041, Mother: BxS #1, Father: BxS #7, Population: ellsu_17, Exome capture sequencing of seedling leaf tissue	1297	B9-001	S-041	BxS #1	BxS #7	ellsu_17	1				SAMN08938689
1298	Sample: 1298, Grandmother: B9-001, Grandfather: S-041, Mother: BxS #1, Father: BxS #7, Population: ellsu_17, Exome capture sequencing of seedling leaf tissue	1298	B9-001	S-041	BxS #1	BxS #7	ellsu_17	1				SAMN08938690
1299	Sample: 1299, Grandmother: B9-001, Grandfather: S-041, Mother: BxS #1, Father: BxS #7, Population: ellsu_17, Exome capture sequencing of seedling leaf tissue	1299	B9-001	S-041	BxS #1	BxS #7	ellsu_17	1				SAMN08938691
1301	Sample: 1301, Grandmother: B9-001, Grandfather: S-041, Mother: BxS #1, Father: BxS #7, Population: ellsu_17, Exome capture sequencing of seedling leaf tissue	1301	B9-001	S-041	BxS #1	BxS #7	ellsu_17	1				SAMN08938692
1303	Sample: 1303, Grandmother: B9-001, Grandfather: S-041, Mother: BxS #1, Father: BxS #7, Population: ellsu_17, Exome capture sequencing of seedling leaf tissue	1303	B9-001	S-041	BxS #1	BxS #7	ellsu_17	1				SAMN08938693
1305	Sample: 1305, Grandmother: B9-001, Grandfather: S-041, Mother: BxS #1, Father: BxS #7, Population: ellsu_17, Exome capture sequencing of seedling leaf tissue	1305	B9-001	S-041	BxS #1	BxS #7	ellsu_17	1				SAMN08938694
1306	Sample: 1306, Grandmother: B9-001, Grandfather: S-041, Mother: BxS #1, Father: BxS #7, Population: ellsu_17, Exome capture sequencing of seedling leaf tissue	1306	B9-001	S-041	BxS #1	BxS #7	ellsu_17	1				SAMN08938695
1307	Sample: 1307, Grandmother: B9-001, Grandfather: S-041, Mother: BxS #1, Father: BxS #7, Population: ellsu_17, Exome capture sequencing of seedling leaf tissue	1307	B9-001	S-041	BxS #1	BxS #7	ellsu_17	1				SAMN08938696
1308	Sample: 1308, Grandmother: B9-001, Grandfather: S-041, Mother: BxS #1, Father: BxS #7, Population: ellsu_17, Exome capture sequencing of seedling leaf tissue	1308	B9-001	S-041	BxS #1	BxS #7	ellsu_17	1				SAMN08938697
1309	Sample: 1309, Grandmother: B9-001, Grandfather: S-041, Mother: BxS #1, Father: BxS #7, Population: ellsu_17, Exome capture sequencing of seedling leaf tissue	1309	B9-001	S-041	BxS #1	BxS #7	ellsu_17	1				SAMN08938698
1310	Sample: 1310, Grandmother: B9-001, Grandfather: S-041, Mother: BxS #1, Father: BxS #7, Population: ellsu_17, Exome capture sequencing of seedling leaf tissue	1310	B9-001	S-041	BxS #1	BxS #7	ellsu_17	1				SAMN08938699
1311	Sample: 1311, Grandmother: B9-001, Grandfather: S-041, Mother: BxS #1, Father: BxS #7, Population: ellsu_17, Exome capture sequencing of seedling leaf tissue	1311	B9-001	S-041	BxS #1	BxS #7	ellsu_17	1				SAMN08938700
1312	Sample: 1312, Grandmother: B9-001, Grandfather: S-041, Mother: BxS #1, Father: BxS #7, Population: ellsu_17, Exome capture sequencing of seedling leaf tissue	1312	B9-001	S-041	BxS #1	BxS #7	ellsu_17	1				SAMN08938701
1313	Sample: 1313, Grandmother: B9-001, Grandfather: S-041, Mother: BxS #1, Father: BxS #7, Population: ellsu_17, Exome capture sequencing of seedling leaf tissue	1313	B9-001	S-041	BxS #1	BxS #7	ellsu_17	1				SAMN08938702
1316	Sample: 1316, Grandmother: B9-001, Grandfather: S-041, Mother: BxS #1, Father: BxS #7, Population: ellsu_17, Exome capture sequencing of seedling leaf tissue	1316	B9-001	S-041	BxS #1	BxS #7	ellsu_17	1				SAMN08938703
1319	Sample: 1319, Grandmother: B9-001, Grandfather: S-041, Mother: BxS #1, Father: BxS #7, Population: ellsu_17, Exome capture sequencing of seedling leaf tissue	1319	B9-001	S-041	BxS #1	BxS #7	ellsu_17	1				SAMN08938704
1321	Sample: 1321, Grandmother: B9-001, Grandfather: S-041, Mother: BxS #1, Father: BxS #7, Population: ellsu_17, Exome capture sequencing of seedling leaf tissue	1321	B9-001	S-041	BxS #1	BxS #7	ellsu_17	1				SAMN08938705
1322	Sample: 1322, Grandmother: B9-001, Grandfather: S-041, Mother: BxS #1, Father: BxS #7, Population: ellsu_17, Exome capture sequencing of seedling leaf tissue	1322	B9-001	S-041	BxS #1	BxS #7	ellsu_17	1				SAMN08938706
1323	Sample: 1323, Grandmother: B9-001, Grandfather: S-041, Mother: BxS #1, Father: BxS #7, Population: ellsu_17, Exome capture sequencing of seedling leaf tissue	1323	B9-001	S-041	BxS #1	BxS #7	ellsu_17	1				SAMN08938707
1324	Sample: 1324, Grandmother: B9-001, Grandfather: S-041, Mother: BxS #1, Father: BxS #7, Population: ellsu_17, Exome capture sequencing of seedling leaf tissue	1324	B9-001	S-041	BxS #1	BxS #7	ellsu_17	1				SAMN08938708
1325	Sample: 1325, Grandmother: B9-001, Grandfather: S-041, Mother: BxS #1, Father: BxS #7, Population: ellsu_17, Exome capture sequencing of seedling leaf tissue	1325	B9-001	S-041	BxS #1	BxS #7	ellsu_17	1				SAMN08938709
1326	Sample: 1326, Grandmother: B9-001, Grandfather: S-041, Mother: BxS #1, Father: BxS #7, Population: ellsu_17, Exome capture sequencing of seedling leaf tissue	1326	B9-001	S-041	BxS #1	BxS #7	ellsu_17	1				SAMN08938710
1327	Sample: 1327, Grandmother: B9-001, Grandfather: S-041, Mother: BxS #1, Father: BxS #7, Population: ellsu_17, Exome capture sequencing of seedling leaf tissue	1327	B9-001	S-041	BxS #1	BxS #7	ellsu_17	1				SAMN08938711
1328	Sample: 1328, Grandmother: B9-001, Grandfather: S-041, Mother: BxS #1, Father: BxS #7, Population: ellsu_17, Exome capture sequencing of seedling leaf tissue	1328	B9-001	S-041	BxS #1	BxS #7	ellsu_17	1				SAMN08938712
1329	Sample: 1329, Grandmother: B9-001, Grandfather: S-041, Mother: BxS #1, Father: BxS #7, Population: ellsu_17, Exome capture sequencing of seedling leaf tissue	1329	B9-001	S-041	BxS #1	BxS #7	ellsu_17	1				SAMN08938713
1330	Sample: 1330, Grandmother: B9-001, Grandfather: S-041, Mother: BxS #1, Father: BxS #7, Population: ellsu_17, Exome capture sequencing of seedling leaf tissue	1330	B9-001	S-041	BxS #1	BxS #7	ellsu_17	1				SAMN08938714
1331	Sample: 1331, Grandmother: B9-001, Grandfather: S-041, Mother: BxS #1, Father: BxS #7, Population: ellsu_17, Exome capture sequencing of seedling leaf tissue	1331	B9-001	S-041	BxS #1	BxS #7	ellsu_17	1				SAMN08938715
1332	Sample: 1332, Grandmother: B9-001, Grandfather: S-041, Mother: BxS #1, Father: BxS #7, Population: ellsu_17, Exome capture sequencing of seedling leaf tissue	1332	B9-001	S-041	BxS #1	BxS #7	ellsu_17	1				SAMN08938716
1334	Sample: 1334, Grandmother: B9-001, Grandfather: S-041, Mother: BxS #1, Father: BxS #7, Population: ellsu_17, Exome capture sequencing of seedling leaf tissue	1334	B9-001	S-041	BxS #1	BxS #7	ellsu_17	1				SAMN08938717
1335	Sample: 1335, Grandmother: B9-001, Grandfather: S-041, Mother: BxS #1, Father: BxS #7, Population: ellsu_17, Exome capture sequencing of seedling leaf tissue	1335	B9-001	S-041	BxS #1	BxS #7	ellsu_17	1				SAMN08938718
1336	Sample: 1336, Grandmother: B9-001, Grandfather: S-041, Mother: BxS #1, Father: BxS #7, Population: ellsu_17, Exome capture sequencing of seedling leaf tissue	1336	B9-001	S-041	BxS #1	BxS #7	ellsu_17	1				SAMN08938719
1337	Sample: 1337, Grandmother: B9-001, Grandfather: S-041, Mother: BxS #1, Father: BxS #7, Population: ellsu_17, Exome capture sequencing of seedling leaf tissue	1337	B9-001	S-041	BxS #1	BxS #7	ellsu_17	1				SAMN08938720
1338	Sample: 1338, Grandmother: B9-001, Grandfather: S-041, Mother: BxS #1, Father: BxS #7, Population: ellsu_17, Exome capture sequencing of seedling leaf tissue	1338	B9-001	S-041	BxS #1	BxS #7	ellsu_17	1				SAMN08938721
1339	Sample: 1339, Grandmother: B9-001, Grandfather: S-041, Mother: BxS #1, Father: BxS #7, Population: ellsu_17, Exome capture sequencing of seedling leaf tissue	1339	B9-001	S-041	BxS #1	BxS #7	ellsu_17	1				SAMN08938722
1340	Sample: 1340, Grandmother: B9-001, Grandfather: S-041, Mother: BxS #1, Father: BxS #7, Population: ellsu_17, Exome capture sequencing of seedling leaf tissue	1340	B9-001	S-041	BxS #1	BxS #7	ellsu_17	1				SAMN08938723
1341	Sample: 1341, Grandmother: B9-001, Grandfather: S-041, Mother: BxS #1, Father: BxS #7, Population: ellsu_17, Exome capture sequencing of seedling leaf tissue	1341	B9-001	S-041	BxS #1	BxS #7	ellsu_17	1				SAMN08938724
1342	Sample: 1342, Grandmother: B9-001, Grandfather: S-041, Mother: BxS #1, Father: BxS #7, Population: ellsu_17, Exome capture sequencing of seedling leaf tissue	1342	B9-001	S-041	BxS #1	BxS #7	ellsu_17	1				SAMN08938725
1343	Sample: 1343, Grandmother: B9-001, Grandfather: S-041, Mother: BxS #1, Father: BxS #7, Population: ellsu_17, Exome capture sequencing of seedling leaf tissue	1343	B9-001	S-041	BxS #1	BxS #7	ellsu_17	1				SAMN08938726
1344	Sample: 1344, Grandmother: B9-001, Grandfather: S-041, Mother: BxS #1, Father: BxS #7, Population: ellsu_17, Exome capture sequencing of seedling leaf tissue	1344	B9-001	S-041	BxS #1	BxS #7	ellsu_17	1				SAMN08938727
1345	Sample: 1345, Grandmother: B9-001, Grandfather: S-041, Mother: BxS #1, Father: BxS #7, Population: ellsu_17, Exome capture sequencing of seedling leaf tissue	1345	B9-001	S-041	BxS #1	BxS #7	ellsu_17	1				SAMN08938728
1346	Sample: 1346, Grandmother: B9-001, Grandfather: S-041, Mother: BxS #1, Father: BxS #7, Population: ellsu_17, Exome capture sequencing of seedling leaf tissue	1346	B9-001	S-041	BxS #1	BxS #7	ellsu_17	1				SAMN08938729
1347	Sample: 1347, Grandmother: B9-001, Grandfather: S-041, Mother: BxS #1, Father: BxS #7, Population: ellsu_17, Exome capture sequencing of seedling leaf tissue	1347	B9-001	S-041	BxS #1	BxS #7	ellsu_17	1				SAMN08938730
1348	Sample: 1348, Grandmother: B9-001, Grandfather: S-041, Mother: BxS #1, Father: BxS #7, Population: ellsu_17, Exome capture sequencing of seedling leaf tissue	1348	B9-001	S-041	BxS #1	BxS #7	ellsu_17	1				SAMN08938731
1350	Sample: 1350, Grandmother: B9-001, Grandfather: S-041, Mother: BxS #1, Father: BxS #7, Population: ellsu_17, Exome capture sequencing of seedling leaf tissue	1350	B9-001	S-041	BxS #1	BxS #7	ellsu_17	1				SAMN08938732
1351	Sample: 1351, Grandmother: B9-001, Grandfather: S-041, Mother: BxS #1, Father: BxS #7, Population: ellsu_17, Exome capture sequencing of seedling leaf tissue	1351	B9-001	S-041	BxS #1	BxS #7	ellsu_17	1				SAMN08938733
1352	Sample: 1352, Grandmother: B9-001, Grandfather: S-041, Mother: BxS #1, Father: BxS #7, Population: ellsu_17, Exome capture sequencing of seedling leaf tissue	1352	B9-001	S-041	BxS #1	BxS #7	ellsu_17	1				SAMN08938734
1354	Sample: 1354, Grandmother: B9-001, Grandfather: S-041, Mother: BxS #1, Father: BxS #7, Population: ellsu_17, Exome capture sequencing of seedling leaf tissue	1354	B9-001	S-041	BxS #1	BxS #7	ellsu_17	1				SAMN08938735
1356	Sample: 1356, Grandmother: B9-001, Grandfather: S-041, Mother: BxS #1, Father: BxS #7, Population: ellsu_17, Exome capture sequencing of seedling leaf tissue	1356	B9-001	S-041	BxS #1	BxS #7	ellsu_17	1				SAMN08938736
1357	Sample: 1357, Grandmother: B9-001, Grandfather: S-041, Mother: BxS #1, Father: BxS #7, Population: ellsu_17, Exome capture sequencing of seedling leaf tissue	1357	B9-001	S-041	BxS #1	BxS #7	ellsu_17	1				SAMN08938737
1358	Sample: 1358, Grandmother: B9-001, Grandfather: S-041, Mother: BxS #1, Father: BxS #7, Population: ellsu_17, Exome capture sequencing of seedling leaf tissue	1358	B9-001	S-041	BxS #1	BxS #7	ellsu_17	1				SAMN08938738
1359	Sample: 1359, Grandmother: B9-001, Grandfather: S-041, Mother: BxS #1, Father: BxS #7, Population: ellsu_17, Exome capture sequencing of seedling leaf tissue	1359	B9-001	S-041	BxS #1	BxS #7	ellsu_17	1				SAMN08938739
1360	Sample: 1360, Grandmother: B9-001, Grandfather: S-041, Mother: BxS #1, Father: BxS #7, Population: ellsu_17, Exome capture sequencing of seedling leaf tissue	1360	B9-001	S-041	BxS #1	BxS #7	ellsu_17	1				SAMN08938740
1361	Sample: 1361, Grandmother: B9-001, Grandfather: S-041, Mother: BxS #1, Father: BxS #7, Population: ellsu_17, Exome capture sequencing of seedling leaf tissue	1361	B9-001	S-041	BxS #1	BxS #7	ellsu_17	1				SAMN08938741
1362	Sample: 1362, Grandmother: B9-001, Grandfather: S-041, Mother: BxS #1, Father: BxS #7, Population: ellsu_17, Exome capture sequencing of seedling leaf tissue	1362	B9-001	S-041	BxS #1	BxS #7	ellsu_17	1				SAMN08938742
1363	Sample: 1363, Grandmother: B9-001, Grandfather: S-041, Mother: BxS #1, Father: BxS #7, Population: ellsu_17, Exome capture sequencing of seedling leaf tissue	1363	B9-001	S-041	BxS #1	BxS #7	ellsu_17	1				SAMN08938743
1364	Sample: 1364, Grandmother: B9-001, Grandfather: S-041, Mother: BxS #1, Father: BxS #7, Population: ellsu_17, Exome capture sequencing of seedling leaf tissue	1364	B9-001	S-041	BxS #1	BxS #7	ellsu_17	1				SAMN08938744
1365	Sample: 1365, Grandmother: B9-001, Grandfather: S-041, Mother: BxS #1, Father: BxS #7, Population: ellsu_17, Exome capture sequencing of seedling leaf tissue	1365	B9-001	S-041	BxS #1	BxS #7	ellsu_17	1				SAMN08938745
1366	Sample: 1366, Grandmother: B9-001, Grandfather: S-041, Mother: BxS #1, Father: BxS #7, Population: ellsu_17, Exome capture sequencing of seedling leaf tissue	1366	B9-001	S-041	BxS #1	BxS #7	ellsu_17	1				SAMN08938746
1367	Sample: 1367, Grandmother: B9-001, Grandfather: S-041, Mother: BxS #1, Father: BxS #7, Population: ellsu_17, Exome capture sequencing of seedling leaf tissue	1367	B9-001	S-041	BxS #1	BxS #7	ellsu_17	1				SAMN08938747
1368	Sample: 1368, Grandmother: B9-001, Grandfather: S-041, Mother: BxS #1, Father: BxS #7, Population: ellsu_17, Exome capture sequencing of seedling leaf tissue	1368	B9-001	S-041	BxS #1	BxS #7	ellsu_17	1				SAMN08938748
1369	Sample: 1369, Grandmother: B9-001, Grandfather: S-041, Mother: BxS #1, Father: BxS #7, Population: ellsu_17, Exome capture sequencing of seedling leaf tissue	1369	B9-001	S-041	BxS #1	BxS #7	ellsu_17	1				SAMN08938749
1370	Sample: 1370, Grandmother: B9-001, Grandfather: S-041, Mother: BxS #1, Father: BxS #7, Population: ellsu_17, Exome capture sequencing of seedling leaf tissue	1370	B9-001	S-041	BxS #1	BxS #7	ellsu_17	1				SAMN08938750
1371	Sample: 1371, Grandmother: B9-001, Grandfather: S-041, Mother: BxS #1, Father: BxS #7, Population: ellsu_17, Exome capture sequencing of seedling leaf tissue	1371	B9-001	S-041	BxS #1	BxS #7	ellsu_17	1				SAMN08938751
1372	Sample: 1372, Grandmother: B9-001, Grandfather: S-041, Mother: BxS #1, Father: BxS #7, Population: ellsu_17, Exome capture sequencing of seedling leaf tissue	1372	B9-001	S-041	BxS #1	BxS #7	ellsu_17	1				SAMN08938752
1373	Sample: 1373, Grandmother: B9-001, Grandfather: S-041, Mother: BxS #1, Father: BxS #7, Population: ellsu_17, Exome capture sequencing of seedling leaf tissue	1373	B9-001	S-041	BxS #1	BxS #7	ellsu_17	1				SAMN08938753
B9-001-1	Sample: B9-001-1, Population: ellsu_17, Exome capture sequencing of seedling leaf tissue	B9-001-1					ellsu_17	1				SAMN08938754
B9-001-2	Sample: B9-001-2, Population: ellsu_17, Exome capture sequencing of seedling leaf tissue	B9-001-2					ellsu_17	1				SAMN08938755
B9-001-3	Sample: B9-001-3, Population: ellsu_17, Exome capture sequencing of seedling leaf tissue	B9-001-3					ellsu_17	1				SAMN08938756
B9-001-4	Sample: B9-001-4, Population: ellsu_17, Exome capture sequencing of seedling leaf tissue	B9-001-4					ellsu_17	1				SAMN08938757
B9-001-5	Sample: B9-001-5, Population: ellsu_17, Exome capture sequencing of seedling leaf tissue	B9-001-5					ellsu_17	1				SAMN08938758
B9-001-6	Sample: B9-001-6, Population: ellsu_17, Exome capture sequencing of seedling leaf tissue	B9-001-6					ellsu_17	1				SAMN08938759
B9-001-7	Sample: B9-001-7, Population: ellsu_17, Exome capture sequencing of seedling leaf tissue	B9-001-7					ellsu_17	1				SAMN08938760
B9-001-8	Sample: B9-001-8, Population: ellsu_17, Exome capture sequencing of seedling leaf tissue	B9-001-8					ellsu_17	1				SAMN08938761
BxS1-1	Sample: BxS1-1, Mother: B9-001, Father: S-041, Population: ellsu_17, Exome capture sequencing of seedling leaf tissue	BxS1-1			B9-001	S-041	ellsu_17	1				SAMN08938762
BxS1-2	Sample: BxS1-2, Mother: B9-001, Father: S-041, Population: ellsu_17, Exome capture sequencing of seedling leaf tissue	BxS1-2			B9-001	S-041	ellsu_17	1				SAMN08938763
BxS1-3	Sample: BxS1-3, Mother: B9-001, Father: S-041, Population: ellsu_17, Exome capture sequencing of seedling leaf tissue	BxS1-3			B9-001	S-041	ellsu_17	1				SAMN08938764
BxS1-4	Sample: BxS1-4, Mother: B9-001, Father: S-041, Population: ellsu_17, Exome capture sequencing of seedling leaf tissue	BxS1-4			B9-001	S-041	ellsu_17	1				SAMN08938765
BxS1-5	Sample: BxS1-5, Mother: B9-001, Father: S-041, Population: ellsu_17, Exome capture sequencing of seedling leaf tissue	BxS1-5			B9-001	S-041	ellsu_17	1				SAMN08938766
BxS1-6	Sample: BxS1-6, Mother: B9-001, Father: S-041, Population: ellsu_17, Exome capture sequencing of seedling leaf tissue	BxS1-6			B9-001	S-041	ellsu_17	1				SAMN08938767
BxS1-7	Sample: BxS1-7, Mother: B9-001, Father: S-041, Population: ellsu_17, Exome capture sequencing of seedling leaf tissue	BxS1-7			B9-001	S-041	ellsu_17	1				SAMN08938768
BxS1-8	Sample: BxS1-8, Mother: B9-001, Father: S-041, Population: ellsu_17, Exome capture sequencing of seedling leaf tissue	BxS1-8			B9-001	S-041	ellsu_17	1				SAMN08938769
BxS7-1	Sample: BxS7-1, Mother: B9-001, Father: S-041, Population: ellsu_17, Exome capture sequencing of seedling leaf tissue	BxS7-1			B9-001	S-041	ellsu_17	1				SAMN08938770
BxS7-2	Sample: BxS7-2, Mother: B9-001, Father: S-041, Population: ellsu_17, Exome capture sequencing of seedling leaf tissue	BxS7-2			B9-001	S-041	ellsu_17	1				SAMN08938771
BxS7-3	Sample: BxS7-3, Mother: B9-001, Father: S-041, Population: ellsu_17, Exome capture sequencing of seedling leaf tissue	BxS7-3			B9-001	S-041	ellsu_17	1				SAMN08938772
BxS7-4	Sample: BxS7-4, Mother: B9-001, Father: S-041, Population: ellsu_17, Exome capture sequencing of seedling leaf tissue	BxS7-4			B9-001	S-041	ellsu_17	1				SAMN08938773
BxS7-5	Sample: BxS7-5, Mother: B9-001, Father: S-041, Population: ellsu_17, Exome capture sequencing of seedling leaf tissue	BxS7-5			B9-001	S-041	ellsu_17	1				SAMN08938774
BxS7-6	Sample: BxS7-6, Mother: B9-001, Father: S-041, Population: ellsu_17, Exome capture sequencing of seedling leaf tissue	BxS7-6			B9-001	S-041	ellsu_17	1				SAMN08938775
BxS7-7	Sample: BxS7-7, Mother: B9-001, Father: S-041, Population: ellsu_17, Exome capture sequencing of seedling leaf tissue	BxS7-7			B9-001	S-041	ellsu_17	1				SAMN08938776
BxS7-8	Sample: BxS7-8, Mother: B9-001, Father: S-041, Population: ellsu_17, Exome capture sequencing of seedling leaf tissue	BxS7-8			B9-001	S-041	ellsu_17	1				SAMN08938777
S-041-1	Sample: S-041-1, Population: ellsu_17, Exome capture sequencing of seedling leaf tissue	S-041-1					ellsu_17	1				SAMN08938778
S-041-2	Sample: S-041-2, Population: ellsu_17, Exome capture sequencing of seedling leaf tissue	S-041-2					ellsu_17	1				SAMN08938779
S-041-3	Sample: S-041-3, Population: ellsu_17, Exome capture sequencing of seedling leaf tissue	S-041-3					ellsu_17	1				SAMN08938780
S-041-4	Sample: S-041-4, Population: ellsu_17, Exome capture sequencing of seedling leaf tissue	S-041-4					ellsu_17	1				SAMN08938781
S-041-5	Sample: S-041-5, Population: ellsu_17, Exome capture sequencing of seedling leaf tissue	S-041-5					ellsu_17	1				SAMN08938782
S-041-6	Sample: S-041-6, Population: ellsu_17, Exome capture sequencing of seedling leaf tissue	S-041-6					ellsu_17	1				SAMN08938783
S-041-7	Sample: S-041-7, Population: ellsu_17, Exome capture sequencing of seedling leaf tissue	S-041-7					ellsu_17	1				SAMN08938784
S-041-8	Sample: S-041-8, Population: ellsu_17, Exome capture sequencing of seedling leaf tissue	S-041-8					ellsu_17	1				SAMN08938785
3001	Sample: 3001, Grandmother: B9-001, Grandfather: S-041, Mother: BxS #3, Father: BxS #4, Population: ellsu_34, Exome capture sequencing of seedling leaf tissue	3001	B9-001	S-041	BxS #3	BxS #4	ellsu_34			1		SAMN08938786
3002	Sample: 3002, Grandmother: B9-001, Grandfather: S-041, Mother: BxS #3, Father: BxS #4, Population: ellsu_34, Exome capture sequencing of seedling leaf tissue	3002	B9-001	S-041	BxS #3	BxS #4	ellsu_34			1		SAMN08938787
3003	Sample: 3003, Grandmother: B9-001, Grandfather: S-041, Mother: BxS #3, Father: BxS #4, Population: ellsu_34, Exome capture sequencing of seedling leaf tissue	3003	B9-001	S-041	BxS #3	BxS #4	ellsu_34			1		SAMN08938788
3004	Sample: 3004, Grandmother: B9-001, Grandfather: S-041, Mother: BxS #3, Father: BxS #4, Population: ellsu_34, Exome capture sequencing of seedling leaf tissue	3004	B9-001	S-041	BxS #3	BxS #4	ellsu_34			1		SAMN08938789
3005	Sample: 3005, Grandmother: B9-001, Grandfather: S-041, Mother: BxS #3, Father: BxS #4, Population: ellsu_34, Exome capture sequencing of seedling leaf tissue	3005	B9-001	S-041	BxS #3	BxS #4	ellsu_34			1		SAMN08938790
3006	Sample: 3006, Grandmother: B9-001, Grandfather: S-041, Mother: BxS #3, Father: BxS #4, Population: ellsu_34, Exome capture sequencing of seedling leaf tissue	3006	B9-001	S-041	BxS #3	BxS #4	ellsu_34			1		SAMN08938791
3007	Sample: 3007, Grandmother: B9-001, Grandfather: S-041, Mother: BxS #3, Father: BxS #4, Population: ellsu_34, Exome capture sequencing of seedling leaf tissue	3007	B9-001	S-041	BxS #3	BxS #4	ellsu_34			1		SAMN08938792
3008	Sample: 3008, Grandmother: B9-001, Grandfather: S-041, Mother: BxS #3, Father: BxS #4, Population: ellsu_34, Exome capture sequencing of seedling leaf tissue	3008	B9-001	S-041	BxS #3	BxS #4	ellsu_34			1		SAMN08938793
3009	Sample: 3009, Grandmother: B9-001, Grandfather: S-041, Mother: BxS #3, Father: BxS #4, Population: ellsu_34, Exome capture sequencing of seedling leaf tissue	3009	B9-001	S-041	BxS #3	BxS #4	ellsu_34			1		SAMN08938794
3010	Sample: 3010, Grandmother: B9-001, Grandfather: S-041, Mother: BxS #3, Father: BxS #4, Population: ellsu_34, Exome capture sequencing of seedling leaf tissue	3010	B9-001	S-041	BxS #3	BxS #4	ellsu_34			1		SAMN08938795
3011	Sample: 3011, Grandmother: B9-001, Grandfather: S-041, Mother: BxS #3, Father: BxS #4, Population: ellsu_34, Exome capture sequencing of seedling leaf tissue	3011	B9-001	S-041	BxS #3	BxS #4	ellsu_34			1		SAMN08938796
3012	Sample: 3012, Grandmother: B9-001, Grandfather: S-041, Mother: BxS #3, Father: BxS #4, Population: ellsu_34, Exome capture sequencing of seedling leaf tissue	3012	B9-001	S-041	BxS #3	BxS #4	ellsu_34			1		SAMN08938797
3013	Sample: 3013, Grandmother: B9-001, Grandfather: S-041, Mother: BxS #3, Father: BxS #4, Population: ellsu_34, Exome capture sequencing of seedling leaf tissue	3013	B9-001	S-041	BxS #3	BxS #4	ellsu_34			1		SAMN08938798
3014	Sample: 3014, Grandmother: B9-001, Grandfather: S-041, Mother: BxS #3, Father: BxS #4, Population: ellsu_34, Exome capture sequencing of seedling leaf tissue	3014	B9-001	S-041	BxS #3	BxS #4	ellsu_34			1		SAMN08938799
3015	Sample: 3015, Grandmother: B9-001, Grandfather: S-041, Mother: BxS #3, Father: BxS #4, Population: ellsu_34, Exome capture sequencing of seedling leaf tissue	3015	B9-001	S-041	BxS #3	BxS #4	ellsu_34			1		SAMN08938800
3016	Sample: 3016, Grandmother: B9-001, Grandfather: S-041, Mother: BxS #3, Father: BxS #4, Population: ellsu_34, Exome capture sequencing of seedling leaf tissue	3016	B9-001	S-041	BxS #3	BxS #4	ellsu_34			1		SAMN08938801
3017	Sample: 3017, Grandmother: B9-001, Grandfather: S-041, Mother: BxS #3, Father: BxS #4, Population: ellsu_34, Exome capture sequencing of seedling leaf tissue	3017	B9-001	S-041	BxS #3	BxS #4	ellsu_34			1		SAMN08938802
3018	Sample: 3018, Grandmother: B9-001, Grandfather: S-041, Mother: BxS #3, Father: BxS #4, Population: ellsu_34, Exome capture sequencing of seedling leaf tissue	3018	B9-001	S-041	BxS #3	BxS #4	ellsu_34			1		SAMN08938803
3019	Sample: 3019, Grandmother: B9-001, Grandfather: S-041, Mother: BxS #3, Father: BxS #4, Population: ellsu_34, Exome capture sequencing of seedling leaf tissue	3019	B9-001	S-041	BxS #3	BxS #4	ellsu_34			1		SAMN08938804
3020	Sample: 3020, Grandmother: B9-001, Grandfather: S-041, Mother: BxS #3, Father: BxS #4, Population: ellsu_34, Exome capture sequencing of seedling leaf tissue	3020	B9-001	S-041	BxS #3	BxS #4	ellsu_34			1		SAMN08938805
3021	Sample: 3021, Grandmother: B9-001, Grandfather: S-041, Mother: BxS #3, Father: BxS #4, Population: ellsu_34, Exome capture sequencing of seedling leaf tissue	3021	B9-001	S-041	BxS #3	BxS #4	ellsu_34			1		SAMN08938806
3022	Sample: 3022, Grandmother: B9-001, Grandfather: S-041, Mother: BxS #3, Father: BxS #4, Population: ellsu_34, Exome capture sequencing of seedling leaf tissue	3022	B9-001	S-041	BxS #3	BxS #4	ellsu_34			1		SAMN08938807
3023	Sample: 3023, Grandmother: B9-001, Grandfather: S-041, Mother: BxS #3, Father: BxS #4, Population: ellsu_34, Exome capture sequencing of seedling leaf tissue	3023	B9-001	S-041	BxS #3	BxS #4	ellsu_34			1		SAMN08938808
3024	Sample: 3024, Grandmother: B9-001, Grandfather: S-041, Mother: BxS #3, Father: BxS #4, Population: ellsu_34, Exome capture sequencing of seedling leaf tissue	3024	B9-001	S-041	BxS #3	BxS #4	ellsu_34			1		SAMN08938809
3025	Sample: 3025, Grandmother: B9-001, Grandfather: S-041, Mother: BxS #3, Father: BxS #4, Population: ellsu_34, Exome capture sequencing of seedling leaf tissue	3025	B9-001	S-041	BxS #3	BxS #4	ellsu_34			1		SAMN08938810
3026	Sample: 3026, Grandmother: B9-001, Grandfather: S-041, Mother: BxS #3, Father: BxS #4, Population: ellsu_34, Exome capture sequencing of seedling leaf tissue	3026	B9-001	S-041	BxS #3	BxS #4	ellsu_34			1		SAMN08938811
3027	Sample: 3027, Grandmother: B9-001, Grandfather: S-041, Mother: BxS #3, Father: BxS #4, Population: ellsu_34, Exome capture sequencing of seedling leaf tissue	3027	B9-001	S-041	BxS #3	BxS #4	ellsu_34			1		SAMN08938812
3028	Sample: 3028, Grandmother: B9-001, Grandfather: S-041, Mother: BxS #3, Father: BxS #4, Population: ellsu_34, Exome capture sequencing of seedling leaf tissue	3028	B9-001	S-041	BxS #3	BxS #4	ellsu_34			1		SAMN08938813
3029	Sample: 3029, Grandmother: B9-001, Grandfather: S-041, Mother: BxS #3, Father: BxS #4, Population: ellsu_34, Exome capture sequencing of seedling leaf tissue	3029	B9-001	S-041	BxS #3	BxS #4	ellsu_34			1		SAMN08938814
3030	Sample: 3030, Grandmother: B9-001, Grandfather: S-041, Mother: BxS #3, Father: BxS #4, Population: ellsu_34, Exome capture sequencing of seedling leaf tissue	3030	B9-001	S-041	BxS #3	BxS #4	ellsu_34			1		SAMN08938815
3031	Sample: 3031, Grandmother: B9-001, Grandfather: S-041, Mother: BxS #3, Father: BxS #4, Population: ellsu_34, Exome capture sequencing of seedling leaf tissue	3031	B9-001	S-041	BxS #3	BxS #4	ellsu_34			1		SAMN08938816
3032	Sample: 3032, Grandmother: B9-001, Grandfather: S-041, Mother: BxS #3, Father: BxS #4, Population: ellsu_34, Exome capture sequencing of seedling leaf tissue	3032	B9-001	S-041	BxS #3	BxS #4	ellsu_34			1		SAMN08938817
3033	Sample: 3033, Grandmother: B9-001, Grandfather: S-041, Mother: BxS #3, Father: BxS #4, Population: ellsu_34, Exome capture sequencing of seedling leaf tissue	3033	B9-001	S-041	BxS #3	BxS #4	ellsu_34			1		SAMN08938818
3034	Sample: 3034, Grandmother: B9-001, Grandfather: S-041, Mother: BxS #3, Father: BxS #4, Population: ellsu_34, Exome capture sequencing of seedling leaf tissue	3034	B9-001	S-041	BxS #3	BxS #4	ellsu_34			1		SAMN08938819
3035	Sample: 3035, Grandmother: B9-001, Grandfather: S-041, Mother: BxS #3, Father: BxS #4, Population: ellsu_34, Exome capture sequencing of seedling leaf tissue	3035	B9-001	S-041	BxS #3	BxS #4	ellsu_34			1		SAMN08938820
3036	Sample: 3036, Grandmother: B9-001, Grandfather: S-041, Mother: BxS #3, Father: BxS #4, Population: ellsu_34, Exome capture sequencing of seedling leaf tissue	3036	B9-001	S-041	BxS #3	BxS #4	ellsu_34			1		SAMN08938821
3037	Sample: 3037, Grandmother: B9-001, Grandfather: S-041, Mother: BxS #3, Father: BxS #4, Population: ellsu_34, Exome capture sequencing of seedling leaf tissue	3037	B9-001	S-041	BxS #3	BxS #4	ellsu_34			1		SAMN08938822
3038	Sample: 3038, Grandmother: B9-001, Grandfather: S-041, Mother: BxS #3, Father: BxS #4, Population: ellsu_34, Exome capture sequencing of seedling leaf tissue	3038	B9-001	S-041	BxS #3	BxS #4	ellsu_34			1		SAMN08938823
3039	Sample: 3039, Grandmother: B9-001, Grandfather: S-041, Mother: BxS #3, Father: BxS #4, Population: ellsu_34, Exome capture sequencing of seedling leaf tissue	3039	B9-001	S-041	BxS #3	BxS #4	ellsu_34			1		SAMN08938824
3040	Sample: 3040, Grandmother: B9-001, Grandfather: S-041, Mother: BxS #3, Father: BxS #4, Population: ellsu_34, Exome capture sequencing of seedling leaf tissue	3040	B9-001	S-041	BxS #3	BxS #4	ellsu_34			1		SAMN08938825
3041	Sample: 3041, Grandmother: B9-001, Grandfather: S-041, Mother: BxS #3, Father: BxS #4, Population: ellsu_34, Exome capture sequencing of seedling leaf tissue	3041	B9-001	S-041	BxS #3	BxS #4	ellsu_34			1		SAMN08938826
3042	Sample: 3042, Grandmother: B9-001, Grandfather: S-041, Mother: BxS #3, Father: BxS #4, Population: ellsu_34, Exome capture sequencing of seedling leaf tissue	3042	B9-001	S-041	BxS #3	BxS #4	ellsu_34			1		SAMN08938827
3043	Sample: 3043, Grandmother: B9-001, Grandfather: S-041, Mother: BxS #3, Father: BxS #4, Population: ellsu_34, Exome capture sequencing of seedling leaf tissue	3043	B9-001	S-041	BxS #3	BxS #4	ellsu_34			1		SAMN08938828
3044	Sample: 3044, Grandmother: B9-001, Grandfather: S-041, Mother: BxS #3, Father: BxS #4, Population: ellsu_34, Exome capture sequencing of seedling leaf tissue	3044	B9-001	S-041	BxS #3	BxS #4	ellsu_34			1		SAMN08938829
3045	Sample: 3045, Grandmother: B9-001, Grandfather: S-041, Mother: BxS #3, Father: BxS #4, Population: ellsu_34, Exome capture sequencing of seedling leaf tissue	3045	B9-001	S-041	BxS #3	BxS #4	ellsu_34			1		SAMN08938830
3046	Sample: 3046, Grandmother: B9-001, Grandfather: S-041, Mother: BxS #3, Father: BxS #4, Population: ellsu_34, Exome capture sequencing of seedling leaf tissue	3046	B9-001	S-041	BxS #3	BxS #4	ellsu_34			1		SAMN08938831
3047	Sample: 3047, Grandmother: B9-001, Grandfather: S-041, Mother: BxS #3, Father: BxS #4, Population: ellsu_34, Exome capture sequencing of seedling leaf tissue	3047	B9-001	S-041	BxS #3	BxS #4	ellsu_34			1		SAMN08938832
3048	Sample: 3048, Grandmother: B9-001, Grandfather: S-041, Mother: BxS #3, Father: BxS #4, Population: ellsu_34, Exome capture sequencing of seedling leaf tissue	3048	B9-001	S-041	BxS #3	BxS #4	ellsu_34			1		SAMN08938833
3049	Sample: 3049, Grandmother: B9-001, Grandfather: S-041, Mother: BxS #3, Father: BxS #4, Population: ellsu_34, Exome capture sequencing of seedling leaf tissue	3049	B9-001	S-041	BxS #3	BxS #4	ellsu_34			1		SAMN08938834
3050	Sample: 3050, Grandmother: B9-001, Grandfather: S-041, Mother: BxS #3, Father: BxS #4, Population: ellsu_34, Exome capture sequencing of seedling leaf tissue	3050	B9-001	S-041	BxS #3	BxS #4	ellsu_34			1		SAMN08938835
3051	Sample: 3051, Grandmother: B9-001, Grandfather: S-041, Mother: BxS #3, Father: BxS #4, Population: ellsu_34, Exome capture sequencing of seedling leaf tissue	3051	B9-001	S-041	BxS #3	BxS #4	ellsu_34			1		SAMN08938836
3052	Sample: 3052, Grandmother: B9-001, Grandfather: S-041, Mother: BxS #3, Father: BxS #4, Population: ellsu_34, Exome capture sequencing of seedling leaf tissue	3052	B9-001	S-041	BxS #3	BxS #4	ellsu_34			1		SAMN08938837
3053	Sample: 3053, Grandmother: B9-001, Grandfather: S-041, Mother: BxS #3, Father: BxS #4, Population: ellsu_34, Exome capture sequencing of seedling leaf tissue	3053	B9-001	S-041	BxS #3	BxS #4	ellsu_34			1		SAMN08938838
3054	Sample: 3054, Grandmother: B9-001, Grandfather: S-041, Mother: BxS #3, Father: BxS #4, Population: ellsu_34, Exome capture sequencing of seedling leaf tissue	3054	B9-001	S-041	BxS #3	BxS #4	ellsu_34			1		SAMN08938839
3055	Sample: 3055, Grandmother: B9-001, Grandfather: S-041, Mother: BxS #3, Father: BxS #4, Population: ellsu_34, Exome capture sequencing of seedling leaf tissue	3055	B9-001	S-041	BxS #3	BxS #4	ellsu_34			1		SAMN08938840
3056	Sample: 3056, Grandmother: B9-001, Grandfather: S-041, Mother: BxS #3, Father: BxS #4, Population: ellsu_34, Exome capture sequencing of seedling leaf tissue	3056	B9-001	S-041	BxS #3	BxS #4	ellsu_34			1		SAMN08938841
3057	Sample: 3057, Grandmother: B9-001, Grandfather: S-041, Mother: BxS #3, Father: BxS #4, Population: ellsu_34, Exome capture sequencing of seedling leaf tissue	3057	B9-001	S-041	BxS #3	BxS #4	ellsu_34			1		SAMN08938842
3058	Sample: 3058, Grandmother: B9-001, Grandfather: S-041, Mother: BxS #3, Father: BxS #4, Population: ellsu_34, Exome capture sequencing of seedling leaf tissue	3058	B9-001	S-041	BxS #3	BxS #4	ellsu_34			1		SAMN08938843
3059	Sample: 3059, Grandmother: B9-001, Grandfather: S-041, Mother: BxS #3, Father: BxS #4, Population: ellsu_34, Exome capture sequencing of seedling leaf tissue	3059	B9-001	S-041	BxS #3	BxS #4	ellsu_34			1		SAMN08938844
3060	Sample: 3060, Grandmother: B9-001, Grandfather: S-041, Mother: BxS #3, Father: BxS #4, Population: ellsu_34, Exome capture sequencing of seedling leaf tissue	3060	B9-001	S-041	BxS #3	BxS #4	ellsu_34			1		SAMN08938845
3062	Sample: 3062, Grandmother: B9-001, Grandfather: S-041, Mother: BxS #3, Father: BxS #4, Population: ellsu_34, Exome capture sequencing of seedling leaf tissue	3062	B9-001	S-041	BxS #3	BxS #4	ellsu_34			1		SAMN08938846
3063	Sample: 3063, Grandmother: B9-001, Grandfather: S-041, Mother: BxS #3, Father: BxS #4, Population: ellsu_34, Exome capture sequencing of seedling leaf tissue	3063	B9-001	S-041	BxS #3	BxS #4	ellsu_34			1		SAMN08938847
3065	Sample: 3065, Grandmother: B9-001, Grandfather: S-041, Mother: BxS #3, Father: BxS #4, Population: ellsu_34, Exome capture sequencing of seedling leaf tissue	3065	B9-001	S-041	BxS #3	BxS #4	ellsu_34			1		SAMN08938848
3066	Sample: 3066, Grandmother: B9-001, Grandfather: S-041, Mother: BxS #3, Father: BxS #4, Population: ellsu_34, Exome capture sequencing of seedling leaf tissue	3066	B9-001	S-041	BxS #3	BxS #4	ellsu_34			1		SAMN08938849
3067	Sample: 3067, Grandmother: B9-001, Grandfather: S-041, Mother: BxS #3, Father: BxS #4, Population: ellsu_34, Exome capture sequencing of seedling leaf tissue	3067	B9-001	S-041	BxS #3	BxS #4	ellsu_34			1		SAMN08938850
3068	Sample: 3068, Grandmother: B9-001, Grandfather: S-041, Mother: BxS #3, Father: BxS #4, Population: ellsu_34, Exome capture sequencing of seedling leaf tissue	3068	B9-001	S-041	BxS #3	BxS #4	ellsu_34			1		SAMN08938851
3069	Sample: 3069, Grandmother: B9-001, Grandfather: S-041, Mother: BxS #3, Father: BxS #4, Population: ellsu_34, Exome capture sequencing of seedling leaf tissue	3069	B9-001	S-041	BxS #3	BxS #4	ellsu_34			1		SAMN08938852
3070	Sample: 3070, Grandmother: B9-001, Grandfather: S-041, Mother: BxS #3, Father: BxS #4, Population: ellsu_34, Exome capture sequencing of seedling leaf tissue	3070	B9-001	S-041	BxS #3	BxS #4	ellsu_34			1		SAMN08938853
3071	Sample: 3071, Grandmother: B9-001, Grandfather: S-041, Mother: BxS #3, Father: BxS #4, Population: ellsu_34, Exome capture sequencing of seedling leaf tissue	3071	B9-001	S-041	BxS #3	BxS #4	ellsu_34			1		SAMN08938854
3072	Sample: 3072, Grandmother: B9-001, Grandfather: S-041, Mother: BxS #3, Father: BxS #4, Population: ellsu_34, Exome capture sequencing of seedling leaf tissue	3072	B9-001	S-041	BxS #3	BxS #4	ellsu_34			1		SAMN08938855
3073	Sample: 3073, Grandmother: B9-001, Grandfather: S-041, Mother: BxS #3, Father: BxS #4, Population: ellsu_34, Exome capture sequencing of seedling leaf tissue	3073	B9-001	S-041	BxS #3	BxS #4	ellsu_34			1		SAMN08938856
3074	Sample: 3074, Grandmother: B9-001, Grandfather: S-041, Mother: BxS #3, Father: BxS #4, Population: ellsu_34, Exome capture sequencing of seedling leaf tissue	3074	B9-001	S-041	BxS #3	BxS #4	ellsu_34			1		SAMN08938857
3075	Sample: 3075, Grandmother: B9-001, Grandfather: S-041, Mother: BxS #3, Father: BxS #4, Population: ellsu_34, Exome capture sequencing of seedling leaf tissue	3075	B9-001	S-041	BxS #3	BxS #4	ellsu_34			1		SAMN08938858
3076	Sample: 3076, Grandmother: B9-001, Grandfather: S-041, Mother: BxS #3, Father: BxS #4, Population: ellsu_34, Exome capture sequencing of seedling leaf tissue	3076	B9-001	S-041	BxS #3	BxS #4	ellsu_34			1		SAMN08938859
3077	Sample: 3077, Grandmother: B9-001, Grandfather: S-041, Mother: BxS #3, Father: BxS #4, Population: ellsu_34, Exome capture sequencing of seedling leaf tissue	3077	B9-001	S-041	BxS #3	BxS #4	ellsu_34			1		SAMN08938860
3078	Sample: 3078, Grandmother: B9-001, Grandfather: S-041, Mother: BxS #3, Father: BxS #4, Population: ellsu_34, Exome capture sequencing of seedling leaf tissue	3078	B9-001	S-041	BxS #3	BxS #4	ellsu_34			1		SAMN08938861
3079	Sample: 3079, Grandmother: B9-001, Grandfather: S-041, Mother: BxS #3, Father: BxS #4, Population: ellsu_34, Exome capture sequencing of seedling leaf tissue	3079	B9-001	S-041	BxS #3	BxS #4	ellsu_34			1		SAMN08938862
3080	Sample: 3080, Grandmother: B9-001, Grandfather: S-041, Mother: BxS #3, Father: BxS #4, Population: ellsu_34, Exome capture sequencing of seedling leaf tissue	3080	B9-001	S-041	BxS #3	BxS #4	ellsu_34			1		SAMN08938863
3081	Sample: 3081, Grandmother: B9-001, Grandfather: S-041, Mother: BxS #3, Father: BxS #4, Population: ellsu_34, Exome capture sequencing of seedling leaf tissue	3081	B9-001	S-041	BxS #3	BxS #4	ellsu_34			1		SAMN08938864
3082	Sample: 3082, Grandmother: B9-001, Grandfather: S-041, Mother: BxS #3, Father: BxS #4, Population: ellsu_34, Exome capture sequencing of seedling leaf tissue	3082	B9-001	S-041	BxS #3	BxS #4	ellsu_34			1		SAMN08938865
3083	Sample: 3083, Grandmother: B9-001, Grandfather: S-041, Mother: BxS #3, Father: BxS #4, Population: ellsu_34, Exome capture sequencing of seedling leaf tissue	3083	B9-001	S-041	BxS #3	BxS #4	ellsu_34			1		SAMN08938866
3084	Sample: 3084, Grandmother: B9-001, Grandfather: S-041, Mother: BxS #3, Father: BxS #4, Population: ellsu_34, Exome capture sequencing of seedling leaf tissue	3084	B9-001	S-041	BxS #3	BxS #4	ellsu_34			1		SAMN08938867
3085	Sample: 3085, Grandmother: B9-001, Grandfather: S-041, Mother: BxS #3, Father: BxS #4, Population: ellsu_34, Exome capture sequencing of seedling leaf tissue	3085	B9-001	S-041	BxS #3	BxS #4	ellsu_34			1		SAMN08938868
3086	Sample: 3086, Grandmother: B9-001, Grandfather: S-041, Mother: BxS #3, Father: BxS #4, Population: ellsu_34, Exome capture sequencing of seedling leaf tissue	3086	B9-001	S-041	BxS #3	BxS #4	ellsu_34			1		SAMN08938869
3087	Sample: 3087, Grandmother: B9-001, Grandfather: S-041, Mother: BxS #3, Father: BxS #4, Population: ellsu_34, Exome capture sequencing of seedling leaf tissue	3087	B9-001	S-041	BxS #3	BxS #4	ellsu_34			1		SAMN08938870
3088	Sample: 3088, Grandmother: B9-001, Grandfather: S-041, Mother: BxS #3, Father: BxS #4, Population: ellsu_34, Exome capture sequencing of seedling leaf tissue	3088	B9-001	S-041	BxS #3	BxS #4	ellsu_34			1		SAMN08938871
3089	Sample: 3089, Grandmother: B9-001, Grandfather: S-041, Mother: BxS #3, Father: BxS #4, Population: ellsu_34, Exome capture sequencing of seedling leaf tissue	3089	B9-001	S-041	BxS #3	BxS #4	ellsu_34			1		SAMN08938872
3090	Sample: 3090, Grandmother: B9-001, Grandfather: S-041, Mother: BxS #3, Father: BxS #4, Population: ellsu_34, Exome capture sequencing of seedling leaf tissue	3090	B9-001	S-041	BxS #3	BxS #4	ellsu_34			1		SAMN08938873
3091	Sample: 3091, Grandmother: B9-001, Grandfather: S-041, Mother: BxS #3, Father: BxS #4, Population: ellsu_34, Exome capture sequencing of seedling leaf tissue	3091	B9-001	S-041	BxS #3	BxS #4	ellsu_34			1		SAMN08938874
3092	Sample: 3092, Grandmother: B9-001, Grandfather: S-041, Mother: BxS #3, Father: BxS #4, Population: ellsu_34, Exome capture sequencing of seedling leaf tissue	3092	B9-001	S-041	BxS #3	BxS #4	ellsu_34			1		SAMN08938875
3093	Sample: 3093, Grandmother: B9-001, Grandfather: S-041, Mother: BxS #3, Father: BxS #4, Population: ellsu_34, Exome capture sequencing of seedling leaf tissue	3093	B9-001	S-041	BxS #3	BxS #4	ellsu_34			1		SAMN08938876
3094	Sample: 3094, Grandmother: B9-001, Grandfather: S-041, Mother: BxS #3, Father: BxS #4, Population: ellsu_34, Exome capture sequencing of seedling leaf tissue	3094	B9-001	S-041	BxS #3	BxS #4	ellsu_34			1		SAMN08938877
3095	Sample: 3095, Grandmother: B9-001, Grandfather: S-041, Mother: BxS #3, Father: BxS #4, Population: ellsu_34, Exome capture sequencing of seedling leaf tissue	3095	B9-001	S-041	BxS #3	BxS #4	ellsu_34			1		SAMN08938878
3096	Sample: 3096, Grandmother: B9-001, Grandfather: S-041, Mother: BxS #3, Father: BxS #4, Population: ellsu_34, Exome capture sequencing of seedling leaf tissue	3096	B9-001	S-041	BxS #3	BxS #4	ellsu_34			1		SAMN08938879
3097	Sample: 3097, Grandmother: B9-001, Grandfather: S-041, Mother: BxS #3, Father: BxS #4, Population: ellsu_34, Exome capture sequencing of seedling leaf tissue	3097	B9-001	S-041	BxS #3	BxS #4	ellsu_34			1		SAMN08938880
3098	Sample: 3098, Grandmother: B9-001, Grandfather: S-041, Mother: BxS #3, Father: BxS #4, Population: ellsu_34, Exome capture sequencing of seedling leaf tissue	3098	B9-001	S-041	BxS #3	BxS #4	ellsu_34			1		SAMN08938881
3099	Sample: 3099, Grandmother: B9-001, Grandfather: S-041, Mother: BxS #3, Father: BxS #4, Population: ellsu_34, Exome capture sequencing of seedling leaf tissue	3099	B9-001	S-041	BxS #3	BxS #4	ellsu_34			1		SAMN08938882
3100	Sample: 3100, Grandmother: B9-001, Grandfather: S-041, Mother: BxS #3, Father: BxS #4, Population: ellsu_34, Exome capture sequencing of seedling leaf tissue	3100	B9-001	S-041	BxS #3	BxS #4	ellsu_34			1		SAMN08938883
3101	Sample: 3101, Grandmother: B9-001, Grandfather: S-041, Mother: BxS #3, Father: BxS #4, Population: ellsu_34, Exome capture sequencing of seedling leaf tissue	3101	B9-001	S-041	BxS #3	BxS #4	ellsu_34			1		SAMN08938884
3102	Sample: 3102, Grandmother: B9-001, Grandfather: S-041, Mother: BxS #3, Father: BxS #4, Population: ellsu_34, Exome capture sequencing of seedling leaf tissue	3102	B9-001	S-041	BxS #3	BxS #4	ellsu_34			1		SAMN08938885
3104	Sample: 3104, Grandmother: B9-001, Grandfather: S-041, Mother: BxS #3, Father: BxS #4, Population: ellsu_34, Exome capture sequencing of seedling leaf tissue	3104	B9-001	S-041	BxS #3	BxS #4	ellsu_34			1		SAMN08938886
3105	Sample: 3105, Grandmother: B9-001, Grandfather: S-041, Mother: BxS #3, Father: BxS #4, Population: ellsu_34, Exome capture sequencing of seedling leaf tissue	3105	B9-001	S-041	BxS #3	BxS #4	ellsu_34			1		SAMN08938887
3106	Sample: 3106, Grandmother: B9-001, Grandfather: S-041, Mother: BxS #3, Father: BxS #4, Population: ellsu_34, Exome capture sequencing of seedling leaf tissue	3106	B9-001	S-041	BxS #3	BxS #4	ellsu_34			1		SAMN08938888
3107	Sample: 3107, Grandmother: B9-001, Grandfather: S-041, Mother: BxS #3, Father: BxS #4, Population: ellsu_34, Exome capture sequencing of seedling leaf tissue	3107	B9-001	S-041	BxS #3	BxS #4	ellsu_34			1		SAMN08938889
3108	Sample: 3108, Grandmother: B9-001, Grandfather: S-041, Mother: BxS #3, Father: BxS #4, Population: ellsu_34, Exome capture sequencing of seedling leaf tissue	3108	B9-001	S-041	BxS #3	BxS #4	ellsu_34			1		SAMN08938890
3109	Sample: 3109, Grandmother: B9-001, Grandfather: S-041, Mother: BxS #3, Father: BxS #4, Population: ellsu_34, Exome capture sequencing of seedling leaf tissue	3109	B9-001	S-041	BxS #3	BxS #4	ellsu_34			1		SAMN08938891
3110	Sample: 3110, Grandmother: B9-001, Grandfather: S-041, Mother: BxS #3, Father: BxS #4, Population: ellsu_34, Exome capture sequencing of seedling leaf tissue	3110	B9-001	S-041	BxS #3	BxS #4	ellsu_34			1		SAMN08938892
3111	Sample: 3111, Grandmother: B9-001, Grandfather: S-041, Mother: BxS #3, Father: BxS #4, Population: ellsu_34, Exome capture sequencing of seedling leaf tissue	3111	B9-001	S-041	BxS #3	BxS #4	ellsu_34			1		SAMN08938893
3112	Sample: 3112, Grandmother: B9-001, Grandfather: S-041, Mother: BxS #3, Father: BxS #4, Population: ellsu_34, Exome capture sequencing of seedling leaf tissue	3112	B9-001	S-041	BxS #3	BxS #4	ellsu_34			1		SAMN08938894
3113	Sample: 3113, Grandmother: B9-001, Grandfather: S-041, Mother: BxS #3, Father: BxS #4, Population: ellsu_34, Exome capture sequencing of seedling leaf tissue	3113	B9-001	S-041	BxS #3	BxS #4	ellsu_34			1		SAMN08938895
3114	Sample: 3114, Grandmother: B9-001, Grandfather: S-041, Mother: BxS #3, Father: BxS #4, Population: ellsu_34, Exome capture sequencing of seedling leaf tissue	3114	B9-001	S-041	BxS #3	BxS #4	ellsu_34			1		SAMN08938896
3115	Sample: 3115, Grandmother: B9-001, Grandfather: S-041, Mother: BxS #3, Father: BxS #4, Population: ellsu_34, Exome capture sequencing of seedling leaf tissue	3115	B9-001	S-041	BxS #3	BxS #4	ellsu_34			1		SAMN08938897
3116	Sample: 3116, Grandmother: B9-001, Grandfather: S-041, Mother: BxS #3, Father: BxS #4, Population: ellsu_34, Exome capture sequencing of seedling leaf tissue	3116	B9-001	S-041	BxS #3	BxS #4	ellsu_34			1		SAMN08938898
3117	Sample: 3117, Grandmother: B9-001, Grandfather: S-041, Mother: BxS #3, Father: BxS #4, Population: ellsu_34, Exome capture sequencing of seedling leaf tissue	3117	B9-001	S-041	BxS #3	BxS #4	ellsu_34			1		SAMN08938899
3118	Sample: 3118, Grandmother: B9-001, Grandfather: S-041, Mother: BxS #3, Father: BxS #4, Population: ellsu_34, Exome capture sequencing of seedling leaf tissue	3118	B9-001	S-041	BxS #3	BxS #4	ellsu_34			1		SAMN08938900
3119	Sample: 3119, Grandmother: B9-001, Grandfather: S-041, Mother: BxS #3, Father: BxS #4, Population: ellsu_34, Exome capture sequencing of seedling leaf tissue	3119	B9-001	S-041	BxS #3	BxS #4	ellsu_34			1		SAMN08938901
3120	Sample: 3120, Grandmother: B9-001, Grandfather: S-041, Mother: BxS #3, Father: BxS #4, Population: ellsu_34, Exome capture sequencing of seedling leaf tissue	3120	B9-001	S-041	BxS #3	BxS #4	ellsu_34			1		SAMN08938902
4001	Sample: 4001, Grandmother: B9-001, Grandfather: S-041, Mother: BxS #4, Father: BxS #3, Population: ellsu_43, Exome capture sequencing of seedling leaf tissue	4001	B9-001	S-041	BxS #4	BxS #3	ellsu_43				1	SAMN08938903
4002	Sample: 4002, Grandmother: B9-001, Grandfather: S-041, Mother: BxS #4, Father: BxS #3, Population: ellsu_43, Exome capture sequencing of seedling leaf tissue	4002	B9-001	S-041	BxS #4	BxS #3	ellsu_43				1	SAMN08938904
4003	Sample: 4003, Grandmother: B9-001, Grandfather: S-041, Mother: BxS #4, Father: BxS #3, Population: ellsu_43, Exome capture sequencing of seedling leaf tissue	4003	B9-001	S-041	BxS #4	BxS #3	ellsu_43				1	SAMN08938905
4004	Sample: 4004, Grandmother: B9-001, Grandfather: S-041, Mother: BxS #4, Father: BxS #3, Population: ellsu_43, Exome capture sequencing of seedling leaf tissue	4004	B9-001	S-041	BxS #4	BxS #3	ellsu_43				1	SAMN08938906
4005	Sample: 4005, Grandmother: B9-001, Grandfather: S-041, Mother: BxS #4, Father: BxS #3, Population: ellsu_43, Exome capture sequencing of seedling leaf tissue	4005	B9-001	S-041	BxS #4	BxS #3	ellsu_43				1	SAMN08938907
4006	Sample: 4006, Grandmother: B9-001, Grandfather: S-041, Mother: BxS #4, Father: BxS #3, Population: ellsu_43, Exome capture sequencing of seedling leaf tissue	4006	B9-001	S-041	BxS #4	BxS #3	ellsu_43				1	SAMN08938908
4007	Sample: 4007, Grandmother: B9-001, Grandfather: S-041, Mother: BxS #4, Father: BxS #3, Population: ellsu_43, Exome capture sequencing of seedling leaf tissue	4007	B9-001	S-041	BxS #4	BxS #3	ellsu_43				1	SAMN08938909
4008	Sample: 4008, Grandmother: B9-001, Grandfather: S-041, Mother: BxS #4, Father: BxS #3, Population: ellsu_43, Exome capture sequencing of seedling leaf tissue	4008	B9-001	S-041	BxS #4	BxS #3	ellsu_43				1	SAMN08938910
4009	Sample: 4009, Grandmother: B9-001, Grandfather: S-041, Mother: BxS #4, Father: BxS #3, Population: ellsu_43, Exome capture sequencing of seedling leaf tissue	4009	B9-001	S-041	BxS #4	BxS #3	ellsu_43				1	SAMN08938911
4010	Sample: 4010, Grandmother: B9-001, Grandfather: S-041, Mother: BxS #4, Father: BxS #3, Population: ellsu_43, Exome capture sequencing of seedling leaf tissue	4010	B9-001	S-041	BxS #4	BxS #3	ellsu_43				1	SAMN08938912
4011	Sample: 4011, Grandmother: B9-001, Grandfather: S-041, Mother: BxS #4, Father: BxS #3, Population: ellsu_43, Exome capture sequencing of seedling leaf tissue	4011	B9-001	S-041	BxS #4	BxS #3	ellsu_43				1	SAMN08938913
4012	Sample: 4012, Grandmother: B9-001, Grandfather: S-041, Mother: BxS #4, Father: BxS #3, Population: ellsu_43, Exome capture sequencing of seedling leaf tissue	4012	B9-001	S-041	BxS #4	BxS #3	ellsu_43				1	SAMN08938914
4013	Sample: 4013, Grandmother: B9-001, Grandfather: S-041, Mother: BxS #4, Father: BxS #3, Population: ellsu_43, Exome capture sequencing of seedling leaf tissue	4013	B9-001	S-041	BxS #4	BxS #3	ellsu_43				1	SAMN08938915
4014	Sample: 4014, Grandmother: B9-001, Grandfather: S-041, Mother: BxS #4, Father: BxS #3, Population: ellsu_43, Exome capture sequencing of seedling leaf tissue	4014	B9-001	S-041	BxS #4	BxS #3	ellsu_43				1	SAMN08938916
4015	Sample: 4015, Grandmother: B9-001, Grandfather: S-041, Mother: BxS #4, Father: BxS #3, Population: ellsu_43, Exome capture sequencing of seedling leaf tissue	4015	B9-001	S-041	BxS #4	BxS #3	ellsu_43				1	SAMN08938917
4016	Sample: 4016, Grandmother: B9-001, Grandfather: S-041, Mother: BxS #4, Father: BxS #3, Population: ellsu_43, Exome capture sequencing of seedling leaf tissue	4016	B9-001	S-041	BxS #4	BxS #3	ellsu_43				1	SAMN08938918
4017	Sample: 4017, Grandmother: B9-001, Grandfather: S-041, Mother: BxS #4, Father: BxS #3, Population: ellsu_43, Exome capture sequencing of seedling leaf tissue	4017	B9-001	S-041	BxS #4	BxS #3	ellsu_43				1	SAMN08938919
4018	Sample: 4018, Grandmother: B9-001, Grandfather: S-041, Mother: BxS #4, Father: BxS #3, Population: ellsu_43, Exome capture sequencing of seedling leaf tissue	4018	B9-001	S-041	BxS #4	BxS #3	ellsu_43				1	SAMN08938920
4019	Sample: 4019, Grandmother: B9-001, Grandfather: S-041, Mother: BxS #4, Father: BxS #3, Population: ellsu_43, Exome capture sequencing of seedling leaf tissue	4019	B9-001	S-041	BxS #4	BxS #3	ellsu_43				1	SAMN08938921
4020	Sample: 4020, Grandmother: B9-001, Grandfather: S-041, Mother: BxS #4, Father: BxS #3, Population: ellsu_43, Exome capture sequencing of seedling leaf tissue	4020	B9-001	S-041	BxS #4	BxS #3	ellsu_43				1	SAMN08938922
4021	Sample: 4021, Grandmother: B9-001, Grandfather: S-041, Mother: BxS #4, Father: BxS #3, Population: ellsu_43, Exome capture sequencing of seedling leaf tissue	4021	B9-001	S-041	BxS #4	BxS #3	ellsu_43				1	SAMN08938923
4022	Sample: 4022, Grandmother: B9-001, Grandfather: S-041, Mother: BxS #4, Father: BxS #3, Population: ellsu_43, Exome capture sequencing of seedling leaf tissue	4022	B9-001	S-041	BxS #4	BxS #3	ellsu_43				1	SAMN08938924
4023	Sample: 4023, Grandmother: B9-001, Grandfather: S-041, Mother: BxS #4, Father: BxS #3, Population: ellsu_43, Exome capture sequencing of seedling leaf tissue	4023	B9-001	S-041	BxS #4	BxS #3	ellsu_43				1	SAMN08938925
4024	Sample: 4024, Grandmother: B9-001, Grandfather: S-041, Mother: BxS #4, Father: BxS #3, Population: ellsu_43, Exome capture sequencing of seedling leaf tissue	4024	B9-001	S-041	BxS #4	BxS #3	ellsu_43				1	SAMN08938926
4025	Sample: 4025, Grandmother: B9-001, Grandfather: S-041, Mother: BxS #4, Father: BxS #3, Population: ellsu_43, Exome capture sequencing of seedling leaf tissue	4025	B9-001	S-041	BxS #4	BxS #3	ellsu_43				1	SAMN08938927
4026	Sample: 4026, Grandmother: B9-001, Grandfather: S-041, Mother: BxS #4, Father: BxS #3, Population: ellsu_43, Exome capture sequencing of seedling leaf tissue	4026	B9-001	S-041	BxS #4	BxS #3	ellsu_43				1	SAMN08938928
4027	Sample: 4027, Grandmother: B9-001, Grandfather: S-041, Mother: BxS #4, Father: BxS #3, Population: ellsu_43, Exome capture sequencing of seedling leaf tissue	4027	B9-001	S-041	BxS #4	BxS #3	ellsu_43				1	SAMN08938929
4028	Sample: 4028, Grandmother: B9-001, Grandfather: S-041, Mother: BxS #4, Father: BxS #3, Population: ellsu_43, Exome capture sequencing of seedling leaf tissue	4028	B9-001	S-041	BxS #4	BxS #3	ellsu_43				1	SAMN08938930
4029	Sample: 4029, Grandmother: B9-001, Grandfather: S-041, Mother: BxS #4, Father: BxS #3, Population: ellsu_43, Exome capture sequencing of seedling leaf tissue	4029	B9-001	S-041	BxS #4	BxS #3	ellsu_43				1	SAMN08938931
4030	Sample: 4030, Grandmother: B9-001, Grandfather: S-041, Mother: BxS #4, Father: BxS #3, Population: ellsu_43, Exome capture sequencing of seedling leaf tissue	4030	B9-001	S-041	BxS #4	BxS #3	ellsu_43				1	SAMN08938932
4031	Sample: 4031, Grandmother: B9-001, Grandfather: S-041, Mother: BxS #4, Father: BxS #3, Population: ellsu_43, Exome capture sequencing of seedling leaf tissue	4031	B9-001	S-041	BxS #4	BxS #3	ellsu_43				1	SAMN08938933
4032	Sample: 4032, Grandmother: B9-001, Grandfather: S-041, Mother: BxS #4, Father: BxS #3, Population: ellsu_43, Exome capture sequencing of seedling leaf tissue	4032	B9-001	S-041	BxS #4	BxS #3	ellsu_43				1	SAMN08938934
4033	Sample: 4033, Grandmother: B9-001, Grandfather: S-041, Mother: BxS #4, Father: BxS #3, Population: ellsu_43, Exome capture sequencing of seedling leaf tissue	4033	B9-001	S-041	BxS #4	BxS #3	ellsu_43				1	SAMN08938935
4034	Sample: 4034, Grandmother: B9-001, Grandfather: S-041, Mother: BxS #4, Father: BxS #3, Population: ellsu_43, Exome capture sequencing of seedling leaf tissue	4034	B9-001	S-041	BxS #4	BxS #3	ellsu_43				1	SAMN08938936
4035	Sample: 4035, Grandmother: B9-001, Grandfather: S-041, Mother: BxS #4, Father: BxS #3, Population: ellsu_43, Exome capture sequencing of seedling leaf tissue	4035	B9-001	S-041	BxS #4	BxS #3	ellsu_43				1	SAMN08938937
4036	Sample: 4036, Grandmother: B9-001, Grandfather: S-041, Mother: BxS #4, Father: BxS #3, Population: ellsu_43, Exome capture sequencing of seedling leaf tissue	4036	B9-001	S-041	BxS #4	BxS #3	ellsu_43				1	SAMN08938938
4037	Sample: 4037, Grandmother: B9-001, Grandfather: S-041, Mother: BxS #4, Father: BxS #3, Population: ellsu_43, Exome capture sequencing of seedling leaf tissue	4037	B9-001	S-041	BxS #4	BxS #3	ellsu_43				1	SAMN08938939
4038	Sample: 4038, Grandmother: B9-001, Grandfather: S-041, Mother: BxS #4, Father: BxS #3, Population: ellsu_43, Exome capture sequencing of seedling leaf tissue	4038	B9-001	S-041	BxS #4	BxS #3	ellsu_43				1	SAMN08938940
4039	Sample: 4039, Grandmother: B9-001, Grandfather: S-041, Mother: BxS #4, Father: BxS #3, Population: ellsu_43, Exome capture sequencing of seedling leaf tissue	4039	B9-001	S-041	BxS #4	BxS #3	ellsu_43				1	SAMN08938941
4040	Sample: 4040, Grandmother: B9-001, Grandfather: S-041, Mother: BxS #4, Father: BxS #3, Population: ellsu_43, Exome capture sequencing of seedling leaf tissue	4040	B9-001	S-041	BxS #4	BxS #3	ellsu_43				1	SAMN08938942
4041	Sample: 4041, Grandmother: B9-001, Grandfather: S-041, Mother: BxS #4, Father: BxS #3, Population: ellsu_43, Exome capture sequencing of seedling leaf tissue	4041	B9-001	S-041	BxS #4	BxS #3	ellsu_43				1	SAMN08938943
4042	Sample: 4042, Grandmother: B9-001, Grandfather: S-041, Mother: BxS #4, Father: BxS #3, Population: ellsu_43, Exome capture sequencing of seedling leaf tissue	4042	B9-001	S-041	BxS #4	BxS #3	ellsu_43				1	SAMN08938944
4043	Sample: 4043, Grandmother: B9-001, Grandfather: S-041, Mother: BxS #4, Father: BxS #3, Population: ellsu_43, Exome capture sequencing of seedling leaf tissue	4043	B9-001	S-041	BxS #4	BxS #3	ellsu_43				1	SAMN08938945
4044	Sample: 4044, Grandmother: B9-001, Grandfather: S-041, Mother: BxS #4, Father: BxS #3, Population: ellsu_43, Exome capture sequencing of seedling leaf tissue	4044	B9-001	S-041	BxS #4	BxS #3	ellsu_43				1	SAMN08938946
4045	Sample: 4045, Grandmother: B9-001, Grandfather: S-041, Mother: BxS #4, Father: BxS #3, Population: ellsu_43, Exome capture sequencing of seedling leaf tissue	4045	B9-001	S-041	BxS #4	BxS #3	ellsu_43				1	SAMN08938947
4046	Sample: 4046, Grandmother: B9-001, Grandfather: S-041, Mother: BxS #4, Father: BxS #3, Population: ellsu_43, Exome capture sequencing of seedling leaf tissue	4046	B9-001	S-041	BxS #4	BxS #3	ellsu_43				1	SAMN08938948
4048	Sample: 4048, Grandmother: B9-001, Grandfather: S-041, Mother: BxS #4, Father: BxS #3, Population: ellsu_43, Exome capture sequencing of seedling leaf tissue	4048	B9-001	S-041	BxS #4	BxS #3	ellsu_43				1	SAMN08938949
4049	Sample: 4049, Grandmother: B9-001, Grandfather: S-041, Mother: BxS #4, Father: BxS #3, Population: ellsu_43, Exome capture sequencing of seedling leaf tissue	4049	B9-001	S-041	BxS #4	BxS #3	ellsu_43				1	SAMN08938950
4050	Sample: 4050, Grandmother: B9-001, Grandfather: S-041, Mother: BxS #4, Father: BxS #3, Population: ellsu_43, Exome capture sequencing of seedling leaf tissue	4050	B9-001	S-041	BxS #4	BxS #3	ellsu_43				1	SAMN08938951
4051	Sample: 4051, Grandmother: B9-001, Grandfather: S-041, Mother: BxS #4, Father: BxS #3, Population: ellsu_43, Exome capture sequencing of seedling leaf tissue	4051	B9-001	S-041	BxS #4	BxS #3	ellsu_43				1	SAMN08938952
4052	Sample: 4052, Grandmother: B9-001, Grandfather: S-041, Mother: BxS #4, Father: BxS #3, Population: ellsu_43, Exome capture sequencing of seedling leaf tissue	4052	B9-001	S-041	BxS #4	BxS #3	ellsu_43				1	SAMN08938953
4053	Sample: 4053, Grandmother: B9-001, Grandfather: S-041, Mother: BxS #4, Father: BxS #3, Population: ellsu_43, Exome capture sequencing of seedling leaf tissue	4053	B9-001	S-041	BxS #4	BxS #3	ellsu_43				1	SAMN08938954
4054	Sample: 4054, Grandmother: B9-001, Grandfather: S-041, Mother: BxS #4, Father: BxS #3, Population: ellsu_43, Exome capture sequencing of seedling leaf tissue	4054	B9-001	S-041	BxS #4	BxS #3	ellsu_43				1	SAMN08938955
4055	Sample: 4055, Grandmother: B9-001, Grandfather: S-041, Mother: BxS #4, Father: BxS #3, Population: ellsu_43, Exome capture sequencing of seedling leaf tissue	4055	B9-001	S-041	BxS #4	BxS #3	ellsu_43				1	SAMN08938956
4056	Sample: 4056, Grandmother: B9-001, Grandfather: S-041, Mother: BxS #4, Father: BxS #3, Population: ellsu_43, Exome capture sequencing of seedling leaf tissue	4056	B9-001	S-041	BxS #4	BxS #3	ellsu_43				1	SAMN08938957
4057	Sample: 4057, Grandmother: B9-001, Grandfather: S-041, Mother: BxS #4, Father: BxS #3, Population: ellsu_43, Exome capture sequencing of seedling leaf tissue	4057	B9-001	S-041	BxS #4	BxS #3	ellsu_43				1	SAMN08938958
4058	Sample: 4058, Grandmother: B9-001, Grandfather: S-041, Mother: BxS #4, Father: BxS #3, Population: ellsu_43, Exome capture sequencing of seedling leaf tissue	4058	B9-001	S-041	BxS #4	BxS #3	ellsu_43				1	SAMN08938959
4059	Sample: 4059, Grandmother: B9-001, Grandfather: S-041, Mother: BxS #4, Father: BxS #3, Population: ellsu_43, Exome capture sequencing of seedling leaf tissue	4059	B9-001	S-041	BxS #4	BxS #3	ellsu_43				1	SAMN08938960
4060	Sample: 4060, Grandmother: B9-001, Grandfather: S-041, Mother: BxS #4, Father: BxS #3, Population: ellsu_43, Exome capture sequencing of seedling leaf tissue	4060	B9-001	S-041	BxS #4	BxS #3	ellsu_43				1	SAMN08938961
4061	Sample: 4061, Grandmother: B9-001, Grandfather: S-041, Mother: BxS #4, Father: BxS #3, Population: ellsu_43, Exome capture sequencing of seedling leaf tissue	4061	B9-001	S-041	BxS #4	BxS #3	ellsu_43				1	SAMN08938962
4063	Sample: 4063, Grandmother: B9-001, Grandfather: S-041, Mother: BxS #4, Father: BxS #3, Population: ellsu_43, Exome capture sequencing of seedling leaf tissue	4063	B9-001	S-041	BxS #4	BxS #3	ellsu_43				1	SAMN08938963
7001	Sample: 7001, Grandmother: B9-001, Grandfather: S-041, Mother: BxS #7, Father: BxS #1, Population: ellsu_71, Exome capture sequencing of seedling leaf tissue	7001	B9-001	S-041	BxS #7	BxS #1	ellsu_71		1			SAMN08938964
7002	Sample: 7002, Grandmother: B9-001, Grandfather: S-041, Mother: BxS #7, Father: BxS #1, Population: ellsu_71, Exome capture sequencing of seedling leaf tissue	7002	B9-001	S-041	BxS #7	BxS #1	ellsu_71		1			SAMN08938965
7003	Sample: 7003, Grandmother: B9-001, Grandfather: S-041, Mother: BxS #7, Father: BxS #1, Population: ellsu_71, Exome capture sequencing of seedling leaf tissue	7003	B9-001	S-041	BxS #7	BxS #1	ellsu_71		1			SAMN08938966
7004	Sample: 7004, Grandmother: B9-001, Grandfather: S-041, Mother: BxS #7, Father: BxS #1, Population: ellsu_71, Exome capture sequencing of seedling leaf tissue	7004	B9-001	S-041	BxS #7	BxS #1	ellsu_71		1			SAMN08938967
7005	Sample: 7005, Grandmother: B9-001, Grandfather: S-041, Mother: BxS #7, Father: BxS #1, Population: ellsu_71, Exome capture sequencing of seedling leaf tissue	7005	B9-001	S-041	BxS #7	BxS #1	ellsu_71		1			SAMN08938968
7006	Sample: 7006, Grandmother: B9-001, Grandfather: S-041, Mother: BxS #7, Father: BxS #1, Population: ellsu_71, Exome capture sequencing of seedling leaf tissue	7006	B9-001	S-041	BxS #7	BxS #1	ellsu_71		1			SAMN08938969
7007	Sample: 7007, Grandmother: B9-001, Grandfather: S-041, Mother: BxS #7, Father: BxS #1, Population: ellsu_71, Exome capture sequencing of seedling leaf tissue	7007	B9-001	S-041	BxS #7	BxS #1	ellsu_71		1			SAMN08938970
7008	Sample: 7008, Grandmother: B9-001, Grandfather: S-041, Mother: BxS #7, Father: BxS #1, Population: ellsu_71, Exome capture sequencing of seedling leaf tissue	7008	B9-001	S-041	BxS #7	BxS #1	ellsu_71		1			SAMN08938971
7009	Sample: 7009, Grandmother: B9-001, Grandfather: S-041, Mother: BxS #7, Father: BxS #1, Population: ellsu_71, Exome capture sequencing of seedling leaf tissue	7009	B9-001	S-041	BxS #7	BxS #1	ellsu_71		1			SAMN08938972
7010	Sample: 7010, Grandmother: B9-001, Grandfather: S-041, Mother: BxS #7, Father: BxS #1, Population: ellsu_71, Exome capture sequencing of seedling leaf tissue	7010	B9-001	S-041	BxS #7	BxS #1	ellsu_71		1			SAMN08938973
7011	Sample: 7011, Grandmother: B9-001, Grandfather: S-041, Mother: BxS #7, Father: BxS #1, Population: ellsu_71, Exome capture sequencing of seedling leaf tissue	7011	B9-001	S-041	BxS #7	BxS #1	ellsu_71		1			SAMN08938974
7012	Sample: 7012, Grandmother: B9-001, Grandfather: S-041, Mother: BxS #7, Father: BxS #1, Population: ellsu_71, Exome capture sequencing of seedling leaf tissue	7012	B9-001	S-041	BxS #7	BxS #1	ellsu_71		1			SAMN08938975
7013	Sample: 7013, Grandmother: B9-001, Grandfather: S-041, Mother: BxS #7, Father: BxS #1, Population: ellsu_71, Exome capture sequencing of seedling leaf tissue	7013	B9-001	S-041	BxS #7	BxS #1	ellsu_71		1			SAMN08938976
7014	Sample: 7014, Grandmother: B9-001, Grandfather: S-041, Mother: BxS #7, Father: BxS #1, Population: ellsu_71, Exome capture sequencing of seedling leaf tissue	7014	B9-001	S-041	BxS #7	BxS #1	ellsu_71		1			SAMN08938977
7015	Sample: 7015, Grandmother: B9-001, Grandfather: S-041, Mother: BxS #7, Father: BxS #1, Population: ellsu_71, Exome capture sequencing of seedling leaf tissue	7015	B9-001	S-041	BxS #7	BxS #1	ellsu_71		1			SAMN08938978
7016	Sample: 7016, Grandmother: B9-001, Grandfather: S-041, Mother: BxS #7, Father: BxS #1, Population: ellsu_71, Exome capture sequencing of seedling leaf tissue	7016	B9-001	S-041	BxS #7	BxS #1	ellsu_71		1			SAMN08938979
7017	Sample: 7017, Grandmother: B9-001, Grandfather: S-041, Mother: BxS #7, Father: BxS #1, Population: ellsu_71, Exome capture sequencing of seedling leaf tissue	7017	B9-001	S-041	BxS #7	BxS #1	ellsu_71		1			SAMN08938980
7018	Sample: 7018, Grandmother: B9-001, Grandfather: S-041, Mother: BxS #7, Father: BxS #1, Population: ellsu_71, Exome capture sequencing of seedling leaf tissue	7018	B9-001	S-041	BxS #7	BxS #1	ellsu_71		1			SAMN08938981
7019	Sample: 7019, Grandmother: B9-001, Grandfather: S-041, Mother: BxS #7, Father: BxS #1, Population: ellsu_71, Exome capture sequencing of seedling leaf tissue	7019	B9-001	S-041	BxS #7	BxS #1	ellsu_71		1			SAMN08938982
7020	Sample: 7020, Grandmother: B9-001, Grandfather: S-041, Mother: BxS #7, Father: BxS #1, Population: ellsu_71, Exome capture sequencing of seedling leaf tissue	7020	B9-001	S-041	BxS #7	BxS #1	ellsu_71		1			SAMN08938983
7021	Sample: 7021, Grandmother: B9-001, Grandfather: S-041, Mother: BxS #7, Father: BxS #1, Population: ellsu_71, Exome capture sequencing of seedling leaf tissue	7021	B9-001	S-041	BxS #7	BxS #1	ellsu_71		1			SAMN08938984
7022	Sample: 7022, Grandmother: B9-001, Grandfather: S-041, Mother: BxS #7, Father: BxS #1, Population: ellsu_71, Exome capture sequencing of seedling leaf tissue	7022	B9-001	S-041	BxS #7	BxS #1	ellsu_71		1			SAMN08938985
7023	Sample: 7023, Grandmother: B9-001, Grandfather: S-041, Mother: BxS #7, Father: BxS #1, Population: ellsu_71, Exome capture sequencing of seedling leaf tissue	7023	B9-001	S-041	BxS #7	BxS #1	ellsu_71		1			SAMN08938986
7024	Sample: 7024, Grandmother: B9-001, Grandfather: S-041, Mother: BxS #7, Father: BxS #1, Population: ellsu_71, Exome capture sequencing of seedling leaf tissue	7024	B9-001	S-041	BxS #7	BxS #1	ellsu_71		1			SAMN08938987
7025	Sample: 7025, Grandmother: B9-001, Grandfather: S-041, Mother: BxS #7, Father: BxS #1, Population: ellsu_71, Exome capture sequencing of seedling leaf tissue	7025	B9-001	S-041	BxS #7	BxS #1	ellsu_71		1			SAMN08938988
7026	Sample: 7026, Grandmother: B9-001, Grandfather: S-041, Mother: BxS #7, Father: BxS #1, Population: ellsu_71, Exome capture sequencing of seedling leaf tissue	7026	B9-001	S-041	BxS #7	BxS #1	ellsu_71		1			SAMN08938989
7027	Sample: 7027, Grandmother: B9-001, Grandfather: S-041, Mother: BxS #7, Father: BxS #1, Population: ellsu_71, Exome capture sequencing of seedling leaf tissue	7027	B9-001	S-041	BxS #7	BxS #1	ellsu_71		1			SAMN08938990
7028	Sample: 7028, Grandmother: B9-001, Grandfather: S-041, Mother: BxS #7, Father: BxS #1, Population: ellsu_71, Exome capture sequencing of seedling leaf tissue	7028	B9-001	S-041	BxS #7	BxS #1	ellsu_71		1			SAMN08938991
7029	Sample: 7029, Grandmother: B9-001, Grandfather: S-041, Mother: BxS #7, Father: BxS #1, Population: ellsu_71, Exome capture sequencing of seedling leaf tissue	7029	B9-001	S-041	BxS #7	BxS #1	ellsu_71		1			SAMN08938992
7030	Sample: 7030, Grandmother: B9-001, Grandfather: S-041, Mother: BxS #7, Father: BxS #1, Population: ellsu_71, Exome capture sequencing of seedling leaf tissue	7030	B9-001	S-041	BxS #7	BxS #1	ellsu_71		1			SAMN08938993
7031	Sample: 7031, Grandmother: B9-001, Grandfather: S-041, Mother: BxS #7, Father: BxS #1, Population: ellsu_71, Exome capture sequencing of seedling leaf tissue	7031	B9-001	S-041	BxS #7	BxS #1	ellsu_71		1			SAMN08938994
7032	Sample: 7032, Grandmother: B9-001, Grandfather: S-041, Mother: BxS #7, Father: BxS #1, Population: ellsu_71, Exome capture sequencing of seedling leaf tissue	7032	B9-001	S-041	BxS #7	BxS #1	ellsu_71		1			SAMN08938995
7033	Sample: 7033, Grandmother: B9-001, Grandfather: S-041, Mother: BxS #7, Father: BxS #1, Population: ellsu_71, Exome capture sequencing of seedling leaf tissue	7033	B9-001	S-041	BxS #7	BxS #1	ellsu_71		1			SAMN08938996
7035	Sample: 7035, Grandmother: B9-001, Grandfather: S-041, Mother: BxS #7, Father: BxS #1, Population: ellsu_71, Exome capture sequencing of seedling leaf tissue	7035	B9-001	S-041	BxS #7	BxS #1	ellsu_71		1			SAMN08938997
7036	Sample: 7036, Grandmother: B9-001, Grandfather: S-041, Mother: BxS #7, Father: BxS #1, Population: ellsu_71, Exome capture sequencing of seedling leaf tissue	7036	B9-001	S-041	BxS #7	BxS #1	ellsu_71		1			SAMN08938998
7037	Sample: 7037, Grandmother: B9-001, Grandfather: S-041, Mother: BxS #7, Father: BxS #1, Population: ellsu_71, Exome capture sequencing of seedling leaf tissue	7037	B9-001	S-041	BxS #7	BxS #1	ellsu_71		1			SAMN08938999
7038	Sample: 7038, Grandmother: B9-001, Grandfather: S-041, Mother: BxS #7, Father: BxS #1, Population: ellsu_71, Exome capture sequencing of seedling leaf tissue	7038	B9-001	S-041	BxS #7	BxS #1	ellsu_71		1			SAMN08939000
7039	Sample: 7039, Grandmother: B9-001, Grandfather: S-041, Mother: BxS #7, Father: BxS #1, Population: ellsu_71, Exome capture sequencing of seedling leaf tissue	7039	B9-001	S-041	BxS #7	BxS #1	ellsu_71		1			SAMN08939001
7040	Sample: 7040, Grandmother: B9-001, Grandfather: S-041, Mother: BxS #7, Father: BxS #1, Population: ellsu_71, Exome capture sequencing of seedling leaf tissue	7040	B9-001	S-041	BxS #7	BxS #1	ellsu_71		1			SAMN08939002
7041	Sample: 7041, Grandmother: B9-001, Grandfather: S-041, Mother: BxS #7, Father: BxS #1, Population: ellsu_71, Exome capture sequencing of seedling leaf tissue	7041	B9-001	S-041	BxS #7	BxS #1	ellsu_71		1			SAMN08939003
7042	Sample: 7042, Grandmother: B9-001, Grandfather: S-041, Mother: BxS #7, Father: BxS #1, Population: ellsu_71, Exome capture sequencing of seedling leaf tissue	7042	B9-001	S-041	BxS #7	BxS #1	ellsu_71		1			SAMN08939004
7043	Sample: 7043, Grandmother: B9-001, Grandfather: S-041, Mother: BxS #7, Father: BxS #1, Population: ellsu_71, Exome capture sequencing of seedling leaf tissue	7043	B9-001	S-041	BxS #7	BxS #1	ellsu_71		1			SAMN08939005
7044	Sample: 7044, Grandmother: B9-001, Grandfather: S-041, Mother: BxS #7, Father: BxS #1, Population: ellsu_71, Exome capture sequencing of seedling leaf tissue	7044	B9-001	S-041	BxS #7	BxS #1	ellsu_71		1			SAMN08939006
7045	Sample: 7045, Grandmother: B9-001, Grandfather: S-041, Mother: BxS #7, Father: BxS #1, Population: ellsu_71, Exome capture sequencing of seedling leaf tissue	7045	B9-001	S-041	BxS #7	BxS #1	ellsu_71		1			SAMN08939007
7046	Sample: 7046, Grandmother: B9-001, Grandfather: S-041, Mother: BxS #7, Father: BxS #1, Population: ellsu_71, Exome capture sequencing of seedling leaf tissue	7046	B9-001	S-041	BxS #7	BxS #1	ellsu_71		1			SAMN08939008
7047	Sample: 7047, Grandmother: B9-001, Grandfather: S-041, Mother: BxS #7, Father: BxS #1, Population: ellsu_71, Exome capture sequencing of seedling leaf tissue	7047	B9-001	S-041	BxS #7	BxS #1	ellsu_71		1			SAMN08939009
7048	Sample: 7048, Grandmother: B9-001, Grandfather: S-041, Mother: BxS #7, Father: BxS #1, Population: ellsu_71, Exome capture sequencing of seedling leaf tissue	7048	B9-001	S-041	BxS #7	BxS #1	ellsu_71		1			SAMN08939010
7049	Sample: 7049, Grandmother: B9-001, Grandfather: S-041, Mother: BxS #7, Father: BxS #1, Population: ellsu_71, Exome capture sequencing of seedling leaf tissue	7049	B9-001	S-041	BxS #7	BxS #1	ellsu_71		1			SAMN08939011
7050	Sample: 7050, Grandmother: B9-001, Grandfather: S-041, Mother: BxS #7, Father: BxS #1, Population: ellsu_71, Exome capture sequencing of seedling leaf tissue	7050	B9-001	S-041	BxS #7	BxS #1	ellsu_71		1			SAMN08939012
7051	Sample: 7051, Grandmother: B9-001, Grandfather: S-041, Mother: BxS #7, Father: BxS #1, Population: ellsu_71, Exome capture sequencing of seedling leaf tissue	7051	B9-001	S-041	BxS #7	BxS #1	ellsu_71		1			SAMN08939013
7052	Sample: 7052, Grandmother: B9-001, Grandfather: S-041, Mother: BxS #7, Father: BxS #1, Population: ellsu_71, Exome capture sequencing of seedling leaf tissue	7052	B9-001	S-041	BxS #7	BxS #1	ellsu_71		1			SAMN08939014
7053	Sample: 7053, Grandmother: B9-001, Grandfather: S-041, Mother: BxS #7, Father: BxS #1, Population: ellsu_71, Exome capture sequencing of seedling leaf tissue	7053	B9-001	S-041	BxS #7	BxS #1	ellsu_71		1			SAMN08939015
7054	Sample: 7054, Grandmother: B9-001, Grandfather: S-041, Mother: BxS #7, Father: BxS #1, Population: ellsu_71, Exome capture sequencing of seedling leaf tissue	7054	B9-001	S-041	BxS #7	BxS #1	ellsu_71		1			SAMN08939016
7055	Sample: 7055, Grandmother: B9-001, Grandfather: S-041, Mother: BxS #7, Father: BxS #1, Population: ellsu_71, Exome capture sequencing of seedling leaf tissue	7055	B9-001	S-041	BxS #7	BxS #1	ellsu_71		1			SAMN08939017
7056	Sample: 7056, Grandmother: B9-001, Grandfather: S-041, Mother: BxS #7, Father: BxS #1, Population: ellsu_71, Exome capture sequencing of seedling leaf tissue	7056	B9-001	S-041	BxS #7	BxS #1	ellsu_71		1			SAMN08939018
7057	Sample: 7057, Grandmother: B9-001, Grandfather: S-041, Mother: BxS #7, Father: BxS #1, Population: ellsu_71, Exome capture sequencing of seedling leaf tissue	7057	B9-001	S-041	BxS #7	BxS #1	ellsu_71		1			SAMN08939019
7058	Sample: 7058, Grandmother: B9-001, Grandfather: S-041, Mother: BxS #7, Father: BxS #1, Population: ellsu_71, Exome capture sequencing of seedling leaf tissue	7058	B9-001	S-041	BxS #7	BxS #1	ellsu_71		1			SAMN08939020
7060	Sample: 7060, Grandmother: B9-001, Grandfather: S-041, Mother: BxS #7, Father: BxS #1, Population: ellsu_71, Exome capture sequencing of seedling leaf tissue	7060	B9-001	S-041	BxS #7	BxS #1	ellsu_71		1			SAMN08939021
7061	Sample: 7061, Grandmother: B9-001, Grandfather: S-041, Mother: BxS #7, Father: BxS #1, Population: ellsu_71, Exome capture sequencing of seedling leaf tissue	7061	B9-001	S-041	BxS #7	BxS #1	ellsu_71		1			SAMN08939022
7062	Sample: 7062, Grandmother: B9-001, Grandfather: S-041, Mother: BxS #7, Father: BxS #1, Population: ellsu_71, Exome capture sequencing of seedling leaf tissue	7062	B9-001	S-041	BxS #7	BxS #1	ellsu_71		1			SAMN08939023
7064	Sample: 7064, Grandmother: B9-001, Grandfather: S-041, Mother: BxS #7, Father: BxS #1, Population: ellsu_71, Exome capture sequencing of seedling leaf tissue	7064	B9-001	S-041	BxS #7	BxS #1	ellsu_71		1			SAMN08939024
7065	Sample: 7065, Grandmother: B9-001, Grandfather: S-041, Mother: BxS #7, Father: BxS #1, Population: ellsu_71, Exome capture sequencing of seedling leaf tissue	7065	B9-001	S-041	BxS #7	BxS #1	ellsu_71		1			SAMN08939025
7066	Sample: 7066, Grandmother: B9-001, Grandfather: S-041, Mother: BxS #7, Father: BxS #1, Population: ellsu_71, Exome capture sequencing of seedling leaf tissue	7066	B9-001	S-041	BxS #7	BxS #1	ellsu_71		1			SAMN08939026
7067	Sample: 7067, Grandmother: B9-001, Grandfather: S-041, Mother: BxS #7, Father: BxS #1, Population: ellsu_71, Exome capture sequencing of seedling leaf tissue	7067	B9-001	S-041	BxS #7	BxS #1	ellsu_71		1			SAMN08939027
7068	Sample: 7068, Grandmother: B9-001, Grandfather: S-041, Mother: BxS #7, Father: BxS #1, Population: ellsu_71, Exome capture sequencing of seedling leaf tissue	7068	B9-001	S-041	BxS #7	BxS #1	ellsu_71		1			SAMN08939028
7069	Sample: 7069, Grandmother: B9-001, Grandfather: S-041, Mother: BxS #7, Father: BxS #1, Population: ellsu_71, Exome capture sequencing of seedling leaf tissue	7069	B9-001	S-041	BxS #7	BxS #1	ellsu_71		1			SAMN08939029
7070	Sample: 7070, Grandmother: B9-001, Grandfather: S-041, Mother: BxS #7, Father: BxS #1, Population: ellsu_71, Exome capture sequencing of seedling leaf tissue	7070	B9-001	S-041	BxS #7	BxS #1	ellsu_71		1			SAMN08939030
7071	Sample: 7071, Grandmother: B9-001, Grandfather: S-041, Mother: BxS #7, Father: BxS #1, Population: ellsu_71, Exome capture sequencing of seedling leaf tissue	7071	B9-001	S-041	BxS #7	BxS #1	ellsu_71		1			SAMN08939031
7072	Sample: 7072, Grandmother: B9-001, Grandfather: S-041, Mother: BxS #7, Father: BxS #1, Population: ellsu_71, Exome capture sequencing of seedling leaf tissue	7072	B9-001	S-041	BxS #7	BxS #1	ellsu_71		1			SAMN08939032
7074	Sample: 7074, Grandmother: B9-001, Grandfather: S-041, Mother: BxS #7, Father: BxS #1, Population: ellsu_71, Exome capture sequencing of seedling leaf tissue	7074	B9-001	S-041	BxS #7	BxS #1	ellsu_71		1			SAMN08939033
7075	Sample: 7075, Grandmother: B9-001, Grandfather: S-041, Mother: BxS #7, Father: BxS #1, Population: ellsu_71, Exome capture sequencing of seedling leaf tissue	7075	B9-001	S-041	BxS #7	BxS #1	ellsu_71		1			SAMN08939034
7076	Sample: 7076, Grandmother: B9-001, Grandfather: S-041, Mother: BxS #7, Father: BxS #1, Population: ellsu_71, Exome capture sequencing of seedling leaf tissue	7076	B9-001	S-041	BxS #7	BxS #1	ellsu_71		1			SAMN08939035
7077	Sample: 7077, Grandmother: B9-001, Grandfather: S-041, Mother: BxS #7, Father: BxS #1, Population: ellsu_71, Exome capture sequencing of seedling leaf tissue	7077	B9-001	S-041	BxS #7	BxS #1	ellsu_71		1			SAMN08939036
7078	Sample: 7078, Grandmother: B9-001, Grandfather: S-041, Mother: BxS #7, Father: BxS #1, Population: ellsu_71, Exome capture sequencing of seedling leaf tissue	7078	B9-001	S-041	BxS #7	BxS #1	ellsu_71		1			SAMN08939037
7079	Sample: 7079, Grandmother: B9-001, Grandfather: S-041, Mother: BxS #7, Father: BxS #1, Population: ellsu_71, Exome capture sequencing of seedling leaf tissue	7079	B9-001	S-041	BxS #7	BxS #1	ellsu_71		1			SAMN08939038
7080	Sample: 7080, Grandmother: B9-001, Grandfather: S-041, Mother: BxS #7, Father: BxS #1, Population: ellsu_71, Exome capture sequencing of seedling leaf tissue	7080	B9-001	S-041	BxS #7	BxS #1	ellsu_71		1			SAMN08939039
7081	Sample: 7081, Grandmother: B9-001, Grandfather: S-041, Mother: BxS #7, Father: BxS #1, Population: ellsu_71, Exome capture sequencing of seedling leaf tissue	7081	B9-001	S-041	BxS #7	BxS #1	ellsu_71		1			SAMN08939040
7082	Sample: 7082, Grandmother: B9-001, Grandfather: S-041, Mother: BxS #7, Father: BxS #1, Population: ellsu_71, Exome capture sequencing of seedling leaf tissue	7082	B9-001	S-041	BxS #7	BxS #1	ellsu_71		1			SAMN08939041
7083	Sample: 7083, Grandmother: B9-001, Grandfather: S-041, Mother: BxS #7, Father: BxS #1, Population: ellsu_71, Exome capture sequencing of seedling leaf tissue	7083	B9-001	S-041	BxS #7	BxS #1	ellsu_71		1			SAMN08939042
7084	Sample: 7084, Grandmother: B9-001, Grandfather: S-041, Mother: BxS #7, Father: BxS #1, Population: ellsu_71, Exome capture sequencing of seedling leaf tissue	7084	B9-001	S-041	BxS #7	BxS #1	ellsu_71		1			SAMN08939043
7085	Sample: 7085, Grandmother: B9-001, Grandfather: S-041, Mother: BxS #7, Father: BxS #1, Population: ellsu_71, Exome capture sequencing of seedling leaf tissue	7085	B9-001	S-041	BxS #7	BxS #1	ellsu_71		1			SAMN08939044
7086	Sample: 7086, Grandmother: B9-001, Grandfather: S-041, Mother: BxS #7, Father: BxS #1, Population: ellsu_71, Exome capture sequencing of seedling leaf tissue	7086	B9-001	S-041	BxS #7	BxS #1	ellsu_71		1			SAMN08939045
7087	Sample: 7087, Grandmother: B9-001, Grandfather: S-041, Mother: BxS #7, Father: BxS #1, Population: ellsu_71, Exome capture sequencing of seedling leaf tissue	7087	B9-001	S-041	BxS #7	BxS #1	ellsu_71		1			SAMN08939046
7089	Sample: 7089, Grandmother: B9-001, Grandfather: S-041, Mother: BxS #7, Father: BxS #1, Population: ellsu_71, Exome capture sequencing of seedling leaf tissue	7089	B9-001	S-041	BxS #7	BxS #1	ellsu_71		1			SAMN08939047
7090	Sample: 7090, Grandmother: B9-001, Grandfather: S-041, Mother: BxS #7, Father: BxS #1, Population: ellsu_71, Exome capture sequencing of seedling leaf tissue	7090	B9-001	S-041	BxS #7	BxS #1	ellsu_71		1			SAMN08939048
7091	Sample: 7091, Grandmother: B9-001, Grandfather: S-041, Mother: BxS #7, Father: BxS #1, Population: ellsu_71, Exome capture sequencing of seedling leaf tissue	7091	B9-001	S-041	BxS #7	BxS #1	ellsu_71		1			SAMN08939049
7092	Sample: 7092, Grandmother: B9-001, Grandfather: S-041, Mother: BxS #7, Father: BxS #1, Population: ellsu_71, Exome capture sequencing of seedling leaf tissue	7092	B9-001	S-041	BxS #7	BxS #1	ellsu_71		1			SAMN08939050
7093	Sample: 7093, Grandmother: B9-001, Grandfather: S-041, Mother: BxS #7, Father: BxS #1, Population: ellsu_71, Exome capture sequencing of seedling leaf tissue	7093	B9-001	S-041	BxS #7	BxS #1	ellsu_71		1			SAMN08939051
7094	Sample: 7094, Grandmother: B9-001, Grandfather: S-041, Mother: BxS #7, Father: BxS #1, Population: ellsu_71, Exome capture sequencing of seedling leaf tissue	7094	B9-001	S-041	BxS #7	BxS #1	ellsu_71		1			SAMN08939052
7095	Sample: 7095, Grandmother: B9-001, Grandfather: S-041, Mother: BxS #7, Father: BxS #1, Population: ellsu_71, Exome capture sequencing of seedling leaf tissue	7095	B9-001	S-041	BxS #7	BxS #1	ellsu_71		1			SAMN08939053
7097	Sample: 7097, Grandmother: B9-001, Grandfather: S-041, Mother: BxS #7, Father: BxS #1, Population: ellsu_71, Exome capture sequencing of seedling leaf tissue	7097	B9-001	S-041	BxS #7	BxS #1	ellsu_71		1			SAMN08939054
7098	Sample: 7098, Grandmother: B9-001, Grandfather: S-041, Mother: BxS #7, Father: BxS #1, Population: ellsu_71, Exome capture sequencing of seedling leaf tissue	7098	B9-001	S-041	BxS #7	BxS #1	ellsu_71		1			SAMN08939055
7099	Sample: 7099, Grandmother: B9-001, Grandfather: S-041, Mother: BxS #7, Father: BxS #1, Population: ellsu_71, Exome capture sequencing of seedling leaf tissue	7099	B9-001	S-041	BxS #7	BxS #1	ellsu_71		1			SAMN08939056
7100	Sample: 7100, Grandmother: B9-001, Grandfather: S-041, Mother: BxS #7, Father: BxS #1, Population: ellsu_71, Exome capture sequencing of seedling leaf tissue	7100	B9-001	S-041	BxS #7	BxS #1	ellsu_71		1			SAMN08939057
7101	Sample: 7101, Grandmother: B9-001, Grandfather: S-041, Mother: BxS #7, Father: BxS #1, Population: ellsu_71, Exome capture sequencing of seedling leaf tissue	7101	B9-001	S-041	BxS #7	BxS #1	ellsu_71		1			SAMN08939058
7102	Sample: 7102, Grandmother: B9-001, Grandfather: S-041, Mother: BxS #7, Father: BxS #1, Population: ellsu_71, Exome capture sequencing of seedling leaf tissue	7102	B9-001	S-041	BxS #7	BxS #1	ellsu_71		1			SAMN08939059
7103	Sample: 7103, Grandmother: B9-001, Grandfather: S-041, Mother: BxS #7, Father: BxS #1, Population: ellsu_71, Exome capture sequencing of seedling leaf tissue	7103	B9-001	S-041	BxS #7	BxS #1	ellsu_71		1			SAMN08939060
7104	Sample: 7104, Grandmother: B9-001, Grandfather: S-041, Mother: BxS #7, Father: BxS #1, Population: ellsu_71, Exome capture sequencing of seedling leaf tissue	7104	B9-001	S-041	BxS #7	BxS #1	ellsu_71		1			SAMN08939061
7105	Sample: 7105, Grandmother: B9-001, Grandfather: S-041, Mother: BxS #7, Father: BxS #1, Population: ellsu_71, Exome capture sequencing of seedling leaf tissue	7105	B9-001	S-041	BxS #7	BxS #1	ellsu_71		1			SAMN08939062
7106	Sample: 7106, Grandmother: B9-001, Grandfather: S-041, Mother: BxS #7, Father: BxS #1, Population: ellsu_71, Exome capture sequencing of seedling leaf tissue	7106	B9-001	S-041	BxS #7	BxS #1	ellsu_71		1			SAMN08939063
7107	Sample: 7107, Grandmother: B9-001, Grandfather: S-041, Mother: BxS #7, Father: BxS #1, Population: ellsu_71, Exome capture sequencing of seedling leaf tissue	7107	B9-001	S-041	BxS #7	BxS #1	ellsu_71		1			SAMN08939064
7108	Sample: 7108, Grandmother: B9-001, Grandfather: S-041, Mother: BxS #7, Father: BxS #1, Population: ellsu_71, Exome capture sequencing of seedling leaf tissue	7108	B9-001	S-041	BxS #7	BxS #1	ellsu_71		1			SAMN08939065
B9-001-11	Sample: B9-001-11, Population: ellsu_71, ellsu_34, & ellsu_43, Exome capture sequencing of seedling leaf tissue	B9-001-11					ellsu_71, ellsu_34, & ellsu_43		1	1	1	SAMN08939066
B9-001-12	Sample: B9-001-12, Population: ellsu_71, ellsu_34, & ellsu_43, Exome capture sequencing of seedling leaf tissue	B9-001-12					ellsu_71, ellsu_34, & ellsu_43		1	1	1	SAMN08939067
B9-001-13	Sample: B9-001-13, Population: ellsu_71, ellsu_34, & ellsu_43, Exome capture sequencing of seedling leaf tissue	B9-001-13					ellsu_71, ellsu_34, & ellsu_43		1	1	1	SAMN08939068
B9-001-14	Sample: B9-001-14, Population: ellsu_71, ellsu_34, & ellsu_43, Exome capture sequencing of seedling leaf tissue	B9-001-14					ellsu_71, ellsu_34, & ellsu_43		1	1	1	SAMN08939069
BXS1-11	Sample: BXS1-11, Mother: B9-001, Father: S-041, Population: ellsu_71, Exome capture sequencing of seedling leaf tissue	BXS1-11			B9-001	S-041	ellsu_71		1			SAMN08939070
BXS1-12	Sample: BXS1-12, Mother: B9-001, Father: S-041, Population: ellsu_71, Exome capture sequencing of seedling leaf tissue	BXS1-12			B9-001	S-041	ellsu_71		1			SAMN08939071
BXS1-13	Sample: BXS1-13, Mother: B9-001, Father: S-041, Population: ellsu_71, Exome capture sequencing of seedling leaf tissue	BXS1-13			B9-001	S-041	ellsu_71		1			SAMN08939072
BXS1-14	Sample: BXS1-14, Mother: B9-001, Father: S-041, Population: ellsu_71, Exome capture sequencing of seedling leaf tissue	BXS1-14			B9-001	S-041	ellsu_71		1			SAMN08939073
BXS3-11	Sample: BXS3-11, Mother: B9-001, Father: S-041, Population: ellsu_34 & ellsu_43, Exome capture sequencing of seedling leaf tissue	BXS3-11			B9-001	S-041	ellsu_34 & ellsu_43			1	1	SAMN08939074
BXS3-12	Sample: BXS3-12, Mother: B9-001, Father: S-041, Population: ellsu_34 & ellsu_43, Exome capture sequencing of seedling leaf tissue	BXS3-12			B9-001	S-041	ellsu_34 & ellsu_43			1	1	SAMN08939075
BXS3-13	Sample: BXS3-13, Mother: B9-001, Father: S-041, Population: ellsu_34 & ellsu_43, Exome capture sequencing of seedling leaf tissue	BXS3-13			B9-001	S-041	ellsu_34 & ellsu_43			1	1	SAMN08939076
BXS3-14	Sample: BXS3-14, Mother: B9-001, Father: S-041, Population: ellsu_34 & ellsu_43, Exome capture sequencing of seedling leaf tissue	BXS3-14			B9-001	S-041	ellsu_34 & ellsu_43			1	1	SAMN08939077
BXS4-11	Sample: BXS4-11, Mother: B9-001, Father: S-041, Population: ellsu_34 & ellsu_43, Exome capture sequencing of seedling leaf tissue	BXS4-11			B9-001	S-041	ellsu_34 & ellsu_43			1	1	SAMN08939078
BXS4-12	Sample: BXS4-12, Mother: B9-001, Father: S-041, Population: ellsu_34 & ellsu_43, Exome capture sequencing of seedling leaf tissue	BXS4-12			B9-001	S-041	ellsu_34 & ellsu_43			1	1	SAMN08939079
BXS4-13	Sample: BXS4-13, Mother: B9-001, Father: S-041, Population: ellsu_34 & ellsu_43, Exome capture sequencing of seedling leaf tissue	BXS4-13			B9-001	S-041	ellsu_34 & ellsu_43			1	1	SAMN08939080
BXS4-14	Sample: BXS4-14, Mother: B9-001, Father: S-041, Population: ellsu_34 & ellsu_43, Exome capture sequencing of seedling leaf tissue	BXS4-14			B9-001	S-041	ellsu_34 & ellsu_43			1	1	SAMN08939081
BXS7-11	Sample: BXS7-11, Mother: B9-001, Father: S-041, Population: ellsu_71, Exome capture sequencing of seedling leaf tissue	BXS7-11			B9-001	S-041	ellsu_71		1			SAMN08939082
BXS7-12	Sample: BXS7-12, Mother: B9-001, Father: S-041, Population: ellsu_71, Exome capture sequencing of seedling leaf tissue	BXS7-12			B9-001	S-041	ellsu_71		1			SAMN08939083
BXS7-13	Sample: BXS7-13, Mother: B9-001, Father: S-041, Population: ellsu_71, Exome capture sequencing of seedling leaf tissue	BXS7-13			B9-001	S-041	ellsu_71		1			SAMN08939084
BXS7-14	Sample: BXS7-14, Mother: B9-001, Father: S-041, Population: ellsu_71, Exome capture sequencing of seedling leaf tissue	BXS7-14			B9-001	S-041	ellsu_71		1			SAMN08939085
S-041-11	Sample: S-041-11, Population: ellsu_71, ellsu_34, & ellsu_43, Exome capture sequencing of seedling leaf tissue	S-041-11					ellsu_71, ellsu_34, & ellsu_43		1	1	1	SAMN08939086
S-041-12	Sample: S-041-12, Population: ellsu_71, ellsu_34, & ellsu_43, Exome capture sequencing of seedling leaf tissue	S-041-12					ellsu_71, ellsu_34, & ellsu_43		1	1	1	SAMN08939087
S-041-13	Sample: S-041-13, Population: ellsu_71, ellsu_34, & ellsu_43, Exome capture sequencing of seedling leaf tissue	S-041-13					ellsu_71, ellsu_34, & ellsu_43		1	1	1	SAMN08939088
S-041-14	Sample: S-041-14, Population: ellsu_71, ellsu_34, & ellsu_43, Exome capture sequencing of seedling leaf tissue	S-041-14					ellsu_71, ellsu_34, & ellsu_43		1	1	1	SAMN08939089
