# Supplementary material for: Genome-Wide Association Study in Pseudo-F2 Populations of Switchgrass Identifies Genetic Loci Affecting Heading and Anthesis Dates
Source: Front Plant Sci. 2018 Sep 13;9:1250. doi: 10.3389/fpls.2018.01250 (PMC6146286; doi:10.3389/fpls.2018.01250)
Supplement: Supplementary file 7 [file Table_4.xlsx]

## Sheet: 50kb
Supplementary TABLE S4. Candidate gene associations for heading and anthesis date identified by GWAS at Lafayette and DeKalb locations for year 2015 and 2016 across 50kb region.
SNP	locusName	Chr	Pos1	Pos2	Best-hit-arabi-name	arabi-defline	Best-hit-rice-name	rice-defline	Trait	Location	Year	Switchgrass-V4	3A	3B	1A	1B	7071A	7071B	7055A	7055B	3A	3B	7071A	7071B	1A	1B	7055A	7055B
rs628677	Pavir.Ha01808	8A	51681615	51684762	AT5G44720.2	Molybdenum cofactor sulfurase family protein	Os09g38772.1	MOSC domain-containing protein, mitochondrial precursor, putative, expressed	Heading	Lafayette and DeKalb	2015/2016	Pavir.9NG354200
	Pavir.Ha01809	8A	51697902	51698276			Os01g41145.1	retrotransposon protein, putative, unclassified, expressed	Heading	Lafayette and DeKalb	2015/2016	Pavir.5NG074800
	Pavir.Ha01810	8A	51699714	51701409	AT3G11660.1	NDR1/HIN1-like 1	Os11g05860.1	harpin-induced protein 1 domain containing protein, expressed	Heading	Lafayette and DeKalb	2015/2016	Pavir.8NG051400					17.005	9.57004	15.8821	5.12602					14.4982	5.50053	15.8821	5.12602
	Pavir.Ha01811	8A	51708573	51709763					Heading	Lafayette and DeKalb	2015/2016															2.63578		3.09833
	Pavir.Ha01812	8A	51710311	51713039	AT5G22870.1	Late embryogenesis abundant (LEA) hydroxyproline-rich glycoprotein family	Os11g05870.1	harpin-induced protein 1 domain containing protein, expressed	Heading	Lafayette and DeKalb	2015/2016	Pavir.8KG073100
	Pavir.Ha01813	8A	51713406	51719193	AT5G52340.1	exocyst subunit exo70 family protein A2	Os11g05880.1	exo70 exocyst complex subunit, putative, expressed	Heading	Lafayette and DeKalb	2015/2016	Pavir.8NG051100						0.562778		0.322755
	Pavir.Ha01814	8A	51721282	51722088	AT2G34320.1	Polynucleotidyl transferase, ribonuclease H-like superfamily protein	Os03g30510.1	expressed protein	Heading	Lafayette and DeKalb	2015/2016	Pavir.9NG497300
	Pavir.Ha01815	8A	51726711	51732546	AT5G24470.1	pseudo-response regulator 5	Os11g05930.1	response regulator receiver domain containing protein, expressed	Heading	Lafayette and DeKalb	2015/2016	Pavir.8NG050900					10.1946	14.6339	11.7429	18.7705
	Pavir.Ha01816	8A	51733340	51734285			Os12g06280.1	expressed protein	Heading	Lafayette and DeKalb	2015/2016	Pavir.8NG050800
	Pavir.Ha01817	8A	51734849	51736286	AT3G44190.1	FAD/NAD(P)-binding oxidoreductase family protein	Os11g05970.1	pyridine nucleotide-disulphide oxidoreductase family protein, putative, expressed	Heading	Lafayette and DeKalb	2015/2016	Pavir.8NG050700
	Pavir.Ha01818	8A	51736955	51738231					Heading	Lafayette and DeKalb	2015/2016	Pavir.8NG050500						1.43546		1.59846
	Pavir.Ha01819	8A	51739013	51741044	AT1G06140.1	Pentatricopeptide repeat (PPR) superfamily protein	Os11g05980.1	tetratricopeptide-like helical, putative, expressed	Heading	Lafayette and DeKalb	2015/2016	Pavir.8NG050400
	Pavir.Ha01820	8A	51741341	51745628	AT3G11670.1	UDP-Glycosyltransferase superfamily protein	Os11g05990.1	digalactosyldiacylglycerol synthase, chloroplast precursor, putative, expressed	Heading	Lafayette and DeKalb	2015/2016	Pavir.8NG050300
	Pavir.Ha01821	8A	51756764	51762535	AT2G27230.2	transcription factor-related	Os11g06010.1	helix-loop-helix DNA-binding protein, putative, expressed	Heading	Lafayette and DeKalb	2015/2016	Pavir.8NG050100
	Pavir.Ha01822	8A	51762538	51767527	AT2G35940.2	BEL1-like homeodomain 1	Os11g06020.1	homeobox domain containing protein, expressed	Heading	Lafayette and DeKalb	2015/2016	Pavir.8NG050000	7.97478	20.1703	9.80337	19.273
rs1088884	Pavir.Eb00229	5B	3721218	3723716	AT4G32300.1	S-domain-2 5	Os01g10710.1	receptor-like protein kinase, putative, expressed	Heading	Lafayette	2015/2016	Pavir.5NG042600
	Pavir.Eb00230	5B	3727111	3734738	AT4G32300.1	S-domain-2 5	Os04g23760.1	lectin protein kinase family protein, putative, expressed	Heading	Lafayette	2015/2016	Pavir.5NG043000
	Pavir.Eb00231	5B	3731247	3731954					Heading	Lafayette	2015/2016	Pavir.9KG356900		2.52926		1.96596
	Pavir.Eb00232	5B	3749132	3750669	AT1G53380.2	Plant protein of unknown function (DUF641)	Os01g10680.2	GIL1, putative, expressed	Heading	Lafayette	2015/2016	Pavir.5NG043600
	Pavir.Eb00233	5B	3754784	3760769					Heading	Lafayette	2015/2016	Pavir.7KG336200
	Pavir.Eb00234	5B	3761770	3764785	AT1G53460.1		Os01g10630.1	expressed protein	Heading	Lafayette	2015/2016	Pavir.5NG044200
	Pavir.Eb00235	5B	3771194	3773452	AT1G78700.1	BES1/BZR1 homolog 4	Os01g10610.1	BES1/BZR1 homolog protein, putative, expressed	Heading	Lafayette	2015/2016	Pavir.5NG044300
	Pavir.Eb00236	5B	3774233	3776780	AT4G18910.1	NOD26-like intrinsic protein 1;2	Os05g11560.1	aquaporin protein, putative, expressed	Heading	Lafayette	2015/2016	Pavir.5NG044400	0.833612	0.337428	0.908095	0.214814
	Pavir.Eb00237	5B	3777007	3777308	AT1G65480.1	PEBP (phosphatidylethanolamine-binding protein) family protein	Os01g10590.1	osFTL8 FT-Like8 homologous to Flowering Locus T gene; contains Pfam profile PF01161: Phosphatidylethanolamine-binding protein, expressed	Heading	Lafayette	2015/2016	Pavir.5NG044500
	Pavir.Eb00238	5B	3793010	3794997	AT1G78600.2	light-regulated zinc finger protein 1	Os01g10580.1	B-box zinc finger family protein, putative, expressed	Heading	Lafayette	2015/2016	Pavir.5NG044800
	Pavir.Eb00239	5B	3802872	3803593					Heading	Lafayette	2015/2016	Pavir.5NG028300		0.404778		0.236555
	Pavir.Eb00240	5B	3819521	3831328	AT3G58770.1		Os01g10530.2	expressed protein	Heading	Lafayette	2015/2016	Pavir.5NG044900					3.63923	1.22513	1.90426	1.30151	2.9471	1.49768	3.63923	1.22513
rs712216	Pavir.Ia02787	9A	55046404	55056051	AT2G44710.1	RNA-binding (RRM/RBD/RNP motifs) family protein	Os10g08570.1	RNA recognition motif family protein, expressed	Anthesis	Lafayette and DeKalb	2016	Pavir.9NG380400
	Pavir.Ia02788	9A	55062191	55062532					Anthesis	Lafayette and DeKalb	2016	Pavir.3NG178000
	Pavir.Ia02789	9A	55066029	55066397	AT4G29090.1	Ribonuclease H-like superfamily protein	Os09g15410.1	retrotransposon protein, putative, unclassified	Anthesis	Lafayette and DeKalb	2016	Pavir.J560700						0.336645		0.683473		0.508188		0.336645
	Pavir.Ia02790	9A	55093268	55095392	AT5G31412.1	hAT transposon superfamily protein	Os01g52430.1	hAT dimerisation domain-containing protein, putative, expressed	Anthesis	Lafayette and DeKalb	2016	Pavir.J711900
	Pavir.Ia02791	9A	55096520	55109100	AT1G50200.1	Alanyl-tRNA synthetase	Os10g10244.1	alanyl-tRNA synthetase, putative, expressed	Anthesis	Lafayette and DeKalb	2016	Pavir.9NG380900	27.515	44.2417	36.6035	57.4448
	Pavir.Ia02792	9A	55116308	55117891					Anthesis	Lafayette and DeKalb	2016	Pavir.2KG181200
	Pavir.Ia02793	9A	55138020	55141068					Anthesis	Lafayette and DeKalb	2016	Pavir.9NG381200
rs888297	Pavir.Bb00118	2B	1685796	1688829	AT1G64625.1	Serine/threonine-protein kinase WNK (With No Lysine)-related	Os07g01130.1	pentatricopeptide containing protein, putative, expressed	Heading	Lafayette and DeKalb	2016	Pavir.2KG017300		1.60791		1.56938
	Pavir.Bb00119	2B	1691663	1693222	AT1G74580.1	Pentatricopeptide repeat (PPR) superfamily protein	Os07g01130.1	pentatricopeptide containing protein, putative, expressed	Heading	Lafayette and DeKalb	2016	Pavir.2KG017400
	Pavir.Bb00120	2B	1706238	1708552	AT3G09220.1	laccase 7	Os07g01110.1	laccase precursor protein, putative, expressed	Heading	Lafayette and DeKalb	2016	Pavir.2KG017500
	Pavir.Bb00121	2B	1708508	1711438	AT3G54060.1		Os03g01008.1	expressed protein	Heading	Lafayette and DeKalb	2016	Pavir.2KG017600
	Pavir.Bb00122	2B	1714532	1717604					Heading	Lafayette and DeKalb	2016	Pavir.3KG244500
	Pavir.Bb00123	2B	1720891	1724280	AT2G39890.1	proline transporter 1	Os07g01090.1	transmembrane amino acid transporter protein, putative, expressed	Heading	Lafayette and DeKalb	2016	Pavir.2KG017700
	Pavir.Bb00124	2B	1736797	1742150	AT2G39950.1		Os07g01060.1	expressed protein	Heading	Lafayette and DeKalb	2016	Pavir.2KG017800
	Pavir.Bb00125	2B	1754675	1758123	AT5G01220.1	sulfoquinovosyldiacylglycerol 2	Os07g01030.1	glycosyl transferase, group 1 domain containing protein, expressed	Heading	Lafayette and DeKalb	2016	Pavir.2KG018000
rs2175421	Pavir.J40827	contig97249	40	2442	AT5G37680.1	ADP-ribosylation factor-like A1A	Os02g49980.1	ADP-ribosylation factor, putative, expressed	Anthesis	Lafayette/DeKalb	2016	Pavir.1NG406900	17.5308	11.5825	17.1415	11.1152	15.3918	10.7912	21.3035	11.3705
