# Supplementary material for: Genome-Wide Association Study in Pseudo-F2 Populations of Switchgrass Identifies Genetic Loci Affecting Heading and Anthesis Dates
Source: Front Plant Sci. 2018 Sep 13;9:1250. doi: 10.3389/fpls.2018.01250 (PMC6146286; doi:10.3389/fpls.2018.01250)
Supplement: Supplementary file 8 [file Table_5.xlsx]

## Sheet: Sheet2
Supplementary Table S5. A list of total 47 FT genes in switchgrass genome
# BLASTP 2.6.0+
# Query: ABI94605.1 flowering locus T-like 1 [Cucurbita maxima]
# Database: Pvi_v1ref
Switchgrass V1.1	% identity	alignment length	mismatches	gap opens	q. start	q. end	s. start	s. end	evalue	bit score	Best-hit-arabi	Best-hit-arabi	arabi-symbol	arabi-defline	Best-hit-rice	rice-defline
Pavir.Da02168	78.363	171	37	0	3	173	5	175	6.45e-102	291	Pavir.Da02168	AT1G65480.1	FT	PEBP (phosphatidylethanolamine-binding protein) family protein	LOC_Os06g06320.1	osFTL2 FT-Like2 homologous to Flowering Locus T gene; contains Pfam profile PF01161: Phosphatidylethanolamine-binding protein, expressed
Pavir.Eb00206	77.976	168	37	0	6	173	5	172	1.89e-99	285	Pavir.Eb00206	AT1G65480.1	FT	PEBP (phosphatidylethanolamine-binding protein) family protein	LOC_Os01g11940.1	osFTL1 FT-Like1 homologous to Flowering Locus T gene; contains Pfam profile PF01161: Phosphatidylethanolamine-binding protein, expressed
Pavir.J16496	69.412	170	52	0	4	173	2	171	2.15e-91	265	Pavir.J16496	AT1G65480.1	FT	PEBP (phosphatidylethanolamine-binding protein) family protein	LOC_Os02g39064.1	osFTL5 FT-Like5 homologous to Flowering Locus T gene; contains Pfam profile PF01161: Phosphatidylethanolamine-binding protein, expressed
Pavir.Gb01380	70	170	51	0	4	173	2	171	1.6e-90	263	Pavir.Gb01380	AT1G65480.1	FT	PEBP (phosphatidylethanolamine-binding protein) family protein	LOC_Os04g41130.1	osFTL6 FT-Like6 homologous to Flowering Locus T gene; contains Pfam profile PF01161: Phosphatidylethanolamine-binding protein, expressed
Pavir.Ab02223	69.412	170	52	0	4	173	2	171	2.59e-90	262	Pavir.Ab02223	AT1G65480.1	FT	PEBP (phosphatidylethanolamine-binding protein) family protein	LOC_Os02g39064.1	osFTL5 FT-Like5 homologous to Flowering Locus T gene; contains Pfam profile PF01161: Phosphatidylethanolamine-binding protein, expressed
Pavir.Ga01549	70	170	51	0	4	173	2	171	1.44e-89	260	Pavir.Ga01549	AT1G65480.1	FT	PEBP (phosphatidylethanolamine-binding protein) family protein	LOC_Os04g41130.1	osFTL6 FT-Like6 homologous to Flowering Locus T gene; contains Pfam profile PF01161: Phosphatidylethanolamine-binding protein, expressed
Pavir.Hb00543	71.176	170	49	0	4	173	5	174	9.23e-89	258	Pavir.Hb00543	AT1G65480.1	FT	PEBP (phosphatidylethanolamine-binding protein) family protein	LOC_Os11g18870.1	osFTL11 FT-Like11 homologous to Flowering Locus T gene; contains Pfam profile PF01161: Phosphatidylethanolamine-binding protein, expressed
Pavir.J02746	61.364	176	68	0	1	176	1	176	1.2e-78	233	Pavir.J02746	AT1G65480.1	FT	PEBP (phosphatidylethanolamine-binding protein) family protein	LOC_Os09g33850.1	osFTL4 FT-Like4 homologous to Flowering Locus T gene; contains Pfam profile PF01161: Phosphatidylethanolamine-binding protein, expressed
Pavir.Aa02861	63.158	171	63	0	6	176	4	174	8.6e-78	231	Pavir.Aa02861	AT1G65480.1	FT	PEBP (phosphatidylethanolamine-binding protein) family protein	LOC_Os02g13830.1	osFTL13 FT-Like13 homologous to Flowering Locus T gene; contains Pfam profile PF01161: Phosphatidylethanolamine-binding protein, expressed
Pavir.Gb01926	61.143	175	68	0	6	180	5	179	1.18e-77	231	Pavir.Gb01926	AT1G65480.1	FT	PEBP (phosphatidylethanolamine-binding protein) family protein	LOC_Os02g13830.1	osFTL13 FT-Like13 homologous to Flowering Locus T gene; contains Pfam profile PF01161: Phosphatidylethanolamine-binding protein, expressed
Pavir.Ha01748	61.714	175	64	2	1	174	1	173	4.01e-74	221	Pavir.Ha01748	AT2G27550.1	ATC	centroradialis	LOC_Os11g05470.1	RCN1 Centroradialis-like1 homogous to TFL1 gene; contains Pfam profile PF01161: Phosphatidylethanolamine-binding protein, expressed
Pavir.Ga02029	59.649	171	69	0	6	176	5	175	4.06e-74	221	Pavir.Ga02029	AT1G65480.1	FT	PEBP (phosphatidylethanolamine-binding protein) family protein	LOC_Os02g13830.1	osFTL13 FT-Like13 homologous to Flowering Locus T gene; contains Pfam profile PF01161: Phosphatidylethanolamine-binding protein, expressed
Pavir.J12294	61.31	168	64	1	6	173	2	168	4.99e-74	221	Pavir.J12294	AT1G65480.1	FT	PEBP (phosphatidylethanolamine-binding protein) family protein	LOC_Os05g44180.1	osFTL10 FT-Like10 homologous to Flowering Locus T gene; contains Pfam profile PF01161: Phosphatidylethanolamine-binding protein, expressed
Pavir.Hb01802	61.143	175	65	2	1	174	1	173	1.07e-73	220	Pavir.Hb01802	AT2G27550.1	ATC	centroradialis	LOC_Os11g05470.1	RCN1 Centroradialis-like1 homogous to TFL1 gene; contains Pfam profile PF01161: Phosphatidylethanolamine-binding protein, expressed
Pavir.Ca00144	61.143	175	65	2	1	174	1	173	4.4e-73	218	Pavir.Ca00144	AT2G27550.1	ATC	centroradialis	LOC_Os11g05470.1	RCN1 Centroradialis-like1 homogous to TFL1 gene; contains Pfam profile PF01161: Phosphatidylethanolamine-binding protein, expressed
Pavir.J07379	60.714	168	65	1	6	173	2	168	7.86e-73	218	Pavir.J07379	AT1G65480.1	FT	PEBP (phosphatidylethanolamine-binding protein) family protein	LOC_Os05g44180.1	osFTL10 FT-Like10 homologous to Flowering Locus T gene; contains Pfam profile PF01161: Phosphatidylethanolamine-binding protein, expressed
Pavir.Aa01965	60.571	175	66	2	1	174	1	173	8.77e-73	218	Pavir.Aa01965	AT2G27550.1	ATC	centroradialis	LOC_Os02g32950.1	RCN2 Centroradialis-like1 homologous to TFL1 gene; contains Pfam profile PF01161: Phosphatidylethanolamine-binding protein, expressed
Pavir.J05082	59.524	168	67	1	6	173	2	168	1.97e-72	217	Pavir.J05082	AT1G65480.1	FT	PEBP (phosphatidylethanolamine-binding protein) family protein	LOC_Os05g44180.1	osFTL10 FT-Like10 homologous to Flowering Locus T gene; contains Pfam profile PF01161: Phosphatidylethanolamine-binding protein, expressed
Pavir.Ab01802	60	175	67	2	1	174	1	173	9.22e-72	215	Pavir.Ab01802	AT2G27550.1	ATC	centroradialis	LOC_Os02g32950.1	RCN2 Centroradialis-like1 homologous to TFL1 gene; contains Pfam profile PF01161: Phosphatidylethanolamine-binding protein, expressed
Pavir.Db01782	80.159	126	21	1	48	173	3	124	2.07e-71	215	Pavir.Db01782	AT1G65480.1	FT	PEBP (phosphatidylethanolamine-binding protein) family protein	LOC_Os06g06320.1	osFTL2 FT-Like2 homologous to Flowering Locus T gene; contains Pfam profile PF01161: Phosphatidylethanolamine-binding protein, expressed
Pavir.Da00834	65.278	144	50	0	30	173	1	144	8.81e-69	207	Pavir.Da00834	AT1G65480.1	FT	PEBP (phosphatidylethanolamine-binding protein) family protein	LOC_Os06g35940.1	osFTL12 FT-Like12 homologous to Flowering Locus T gene; contains Pfam profile PF01161: Phosphatidylethanolamine-binding protein, expressed
Pavir.Ga01921	58.96	173	67	3	3	174	4	173	1.83e-68	207	Pavir.Ga01921	AT2G27550.1	ATC	centroradialis	LOC_Os04g33570.1	RCN4 Centroradialis-like1 homologous to TFL1 gene; contains Pfam profile PF01161: Phosphatidylethanolamine-binding protein, expressed
Pavir.Gb01907	57.955	176	69	4	1	174	1	173	1.17e-66	202	Pavir.Gb01907	AT2G27550.1	ATC	centroradialis	LOC_Os04g33570.1	RCN4 Centroradialis-like1 homologous to TFL1 gene; contains Pfam profile PF01161: Phosphatidylethanolamine-binding protein, expressed
Pavir.J18534	84.906	106	16	0	68	173	1	106	4.99e-65	196	Pavir.J18534	AT1G65480.1	FT	PEBP (phosphatidylethanolamine-binding protein) family protein	LOC_Os06g06320.1	osFTL2 FT-Like2 homologous to Flowering Locus T gene; contains Pfam profile PF01161: Phosphatidylethanolamine-binding protein, expressed
Pavir.J31547	84.906	106	16	0	68	173	1	106	6.22e-65	196	Pavir.J31547	AT1G65480.1	FT	PEBP (phosphatidylethanolamine-binding protein) family protein	LOC_Os06g06320.1	osFTL2 FT-Like2 homologous to Flowering Locus T gene; contains Pfam profile PF01161: Phosphatidylethanolamine-binding protein, expressed
Pavir.Cb01858	61.446	166	62	1	1	164	1	166	3.71e-63	193	Pavir.Cb01858	AT4G20370.1	TSF	PEBP (phosphatidylethanolamine-binding protein) family protein	LOC_Os12g13030.1	osFTL7 FT-Like7 homologous to Flowering Locus T gene; contains Pfam profile PF01161: Phosphatidylethanolamine-binding protein, expressed
Pavir.Ca00392	60.241	166	64	1	1	164	1	166	5.78e-61	188	Pavir.Ca00392	AT4G20370.1	TSF	PEBP (phosphatidylethanolamine-binding protein) family protein	LOC_Os12g13030.1	osFTL7 FT-Like7 homologous to Flowering Locus T gene; contains Pfam profile PF01161: Phosphatidylethanolamine-binding protein, expressed
Pavir.Ha00530	79.091	110	23	0	64	173	6	115	7.57e-61	186	Pavir.Ha00530	AT1G65480.1	FT	PEBP (phosphatidylethanolamine-binding protein) family protein	LOC_Os11g18870.1	osFTL11 FT-Like11 homologous to Flowering Locus T gene; contains Pfam profile PF01161: Phosphatidylethanolamine-binding protein, expressed
Pavir.Ga02666	49.444	180	78	5	1	174	1	173	5.32e-51	162	Pavir.Ga02666	AT1G18100.1	E12A11,MFT	PEBP (phosphatidylethanolamine-binding protein) family protein	LOC_Os06g30370.1	osMFT1 MFT-Like1 homologous to Mother of FT and TFL1 gene; contains Pfam profile PF01161: Phosphatidylethanolamine-binding protein, expressed
Pavir.J13847	82.558	86	15	0	88	173	1	86	3.96e-48	152	Pavir.J13847	AT1G65480.1	FT	PEBP (phosphatidylethanolamine-binding protein) family protein	LOC_Os06g06320.1	osFTL2 FT-Like2 homologous to Flowering Locus T gene; contains Pfam profile PF01161: Phosphatidylethanolamine-binding protein, expressed
Pavir.J21416	80.233	86	17	0	88	173	1	86	8.76e-48	151	Pavir.J21416	AT1G65480.1	FT	PEBP (phosphatidylethanolamine-binding protein) family protein	LOC_Os01g11940.1	osFTL1 FT-Like1 homologous to Flowering Locus T gene; contains Pfam profile PF01161: Phosphatidylethanolamine-binding protein, expressed
Pavir.J34162	60.606	99	39	0	4	102	6	104	7.11e-42	137	Pavir.J34162	AT5G62040.1		PEBP (phosphatidylethanolamine-binding protein) family protein	LOC_Os01g10590.1	osFTL8 FT-Like8 homologous to Flowering Locus T gene; contains Pfam profile PF01161: Phosphatidylethanolamine-binding protein, expressed
Pavir.Da01177	71.765	85	24	0	3	87	13	97	8.72e-42	136	Pavir.Da01177	AT1G65480.1	FT	PEBP (phosphatidylethanolamine-binding protein) family protein	LOC_Os06g06320.1	osFTL2 FT-Like2 homologous to Flowering Locus T gene; contains Pfam profile PF01161: Phosphatidylethanolamine-binding protein, expressed
Pavir.Ea00062	75.61	82	20	0	6	87	5	86	2.43e-41	135	Pavir.Ea00062	AT1G65480.1	FT	PEBP (phosphatidylethanolamine-binding protein) family protein	LOC_Os01g11940.1	osFTL1 FT-Like1 homologous to Flowering Locus T gene; contains Pfam profile PF01161: Phosphatidylethanolamine-binding protein, expressed
Pavir.J12909	62.887	97	36	0	6	102	5	101	2.94e-41	135	Pavir.J12909	AT5G62040.1		PEBP (phosphatidylethanolamine-binding protein) family protein	LOC_Os01g54490.1	osFTL9 FT-Like9 homologous to Flowering Locus T gene; contains Pfam profile PF01161: Phosphatidylethanolamine-binding protein
Pavir.J31609	62.245	98	37	0	5	102	7	104	9.33e-41	134	Pavir.J31609	AT1G65480.1	FT	PEBP (phosphatidylethanolamine-binding protein) family protein	LOC_Os01g11940.1	osFTL1 FT-Like1 homologous to Flowering Locus T gene; contains Pfam profile PF01161: Phosphatidylethanolamine-binding protein, expressed
Pavir.Ea00747	58.879	107	42	1	68	174	1	105	9.47e-39	129	Pavir.Ea00747	AT1G18100.1	E12A11,MFT	PEBP (phosphatidylethanolamine-binding protein) family protein	LOC_Os01g02120.1	osMFT2 MFT-Like2 homologous to Mother of FT and TFL1 gene; contains Pfam profile PF01161: Phosphatidylethanolamine-binding protein, expressed
Pavir.J14868	57.843	102	43	0	6	107	4	105	2.05e-38	128	Pavir.J14868	AT1G65480.1	FT	PEBP (phosphatidylethanolamine-binding protein) family protein	LOC_Os06g35940.1	osFTL12 FT-Like12 homologous to Flowering Locus T gene; contains Pfam profile PF01161: Phosphatidylethanolamine-binding protein, expressed
Pavir.J31387	57.843	102	42	1	1	102	1	101	5.24e-35	119	Pavir.J31387	AT1G18100.1	E12A11,MFT	PEBP (phosphatidylethanolamine-binding protein) family protein	LOC_Os01g02120.1	osMFT2 MFT-Like2 homologous to Mother of FT and TFL1 gene; contains Pfam profile PF01161: Phosphatidylethanolamine-binding protein, expressed
Pavir.Da01429	52.941	102	47	1	1	102	1	101	1.36e-32	113	Pavir.Da01429	AT1G18100.1	E12A11,MFT	PEBP (phosphatidylethanolamine-binding protein) family protein	LOC_Os06g30370.1	osMFT1 MFT-Like1 homologous to Mother of FT and TFL1 gene; contains Pfam profile PF01161: Phosphatidylethanolamine-binding protein, expressed
Pavir.J22028	67.123	73	24	0	101	173	3	75	5.67e-32	111	Pavir.J22028	AT1G65480.1	FT	PEBP (phosphatidylethanolamine-binding protein) family protein	LOC_Os06g35940.1	osFTL12 FT-Like12 homologous to Flowering Locus T gene; contains Pfam profile PF01161: Phosphatidylethanolamine-binding protein, expressed
Pavir.Ea00768	54.545	99	44	1	1	99	1	98	1.67e-31	111	Pavir.Ea00768	AT1G18100.1	E12A11,MFT	PEBP (phosphatidylethanolamine-binding protein) family protein	LOC_Os01g02120.1	osMFT2 MFT-Like2 homologous to Mother of FT and TFL1 gene; contains Pfam profile PF01161: Phosphatidylethanolamine-binding protein, expressed
Pavir.J06345	62.791	86	31	1	88	173	1	85	1.04e-30	108	Pavir.J06345	AT1G65480.1	FT	PEBP (phosphatidylethanolamine-binding protein) family protein	LOC_Os05g44180.1	osFTL10 FT-Like10 homologous to Flowering Locus T gene; contains Pfam profile PF01161: Phosphatidylethanolamine-binding protein, expressed
Pavir.Eb00237	57.534	73	30	1	102	173	5	77	1.46e-23	90.1	Pavir.Eb00237	AT1G65480.1	FT	PEBP (phosphatidylethanolamine-binding protein) family protein	LOC_Os01g10590.1	osFTL8 FT-Like8 homologous to Flowering Locus T gene; contains Pfam profile PF01161: Phosphatidylethanolamine-binding protein, expressed
Pavir.J22163	57.813	64	27	0	4	67	5	68	2.8e-21	84	Pavir.J22163	AT1G65480.1	FT	PEBP (phosphatidylethanolamine-binding protein) family protein	LOC_Os11g18870.1	osFTL11 FT-Like11 homologous to Flowering Locus T gene; contains Pfam profile PF01161: Phosphatidylethanolamine-binding protein, expressed
Pavir.Da01266	49.367	79	32	3	102	174	1	77	8.62e-16	69.7	Pavir.Da01266	AT1G18100.1	E12A11,MFT	PEBP (phosphatidylethanolamine-binding protein) family protein	LOC_Os06g30370.1	osMFT1 MFT-Like1 homologous to Mother of FT and TFL1 gene; contains Pfam profile PF01161: Phosphatidylethanolamine-binding protein, expressed
Pavir.Ea00223	60	40	16	0	134	173	9	48	6.21e-10	54.3	Pavir.Ea00223	AT1G65480.1	FT	PEBP (phosphatidylethanolamine-binding protein) family protein	LOC_Os01g10590.1	osFTL8 FT-Like8 homologous to Flowering Locus T gene; contains Pfam profile PF01161: Phosphatidylethanolamine-binding protein, expressed
